# Supplementary material for: Copper-catalyzed asymmetric addition of arylboronates to isatins: a catalytic cycle involving alkoxocopper intermediates
Source: Royal Society of Chemistry journal article supplement (doi:10.1039/c0cc01635g), 2010-01-01

# Copper-catalyzed asymmetric addition of arylboronates to isatins: A catalytic cycle involving alkoxocopper intermediates

Ryo Shintani,\* Keishi Takatsu and Tamio Hayashi\*

Department of Chemistry, Graduate School of Science, Kyoto University,  
Sakyo, Kyoto 606-8502, Japan

## Electronic Supplementary Information

### I. General

All air- and moisture-sensitive manipulations were carried out with standard Schlenk techniques under nitrogen or in a glove box under argon.

THF, toluene, and dioxane were purified by passing through neutral alumina columns under nitrogen. DMF was distilled over CaH<sub>2</sub> under vacuum. CH<sub>2</sub>Cl<sub>2</sub> was distilled over CaH<sub>2</sub> under nitrogen. Hexane was distilled over benzophenone ketyl under nitrogen.

5-Fluoroisatin (Wako Chemicals), 5-methylisatin (ICN), 6-bromoisatin (Wako Chemicals), 6-chloroisatin (Wako Chemicals), isatin (Wako Chemicals), triphenylmethyl bromide (TCI), ethyl chloroglyoxylate (TCI), 2,6-dimethylaniline (Wako Chemicals), aniline (Wako Chemicals), 2,6-diethylaniline (Wako Chemicals), 2,6-diisopropylaniline (TCI), pyridine (Wako Chemicals), (*S*)-phenylglycinol (Wako Chemicals), (*S*)-valinol (TCI), (*S*)-*tert*-leucinol (Aldrich), trimethyl orthoformate (Wako Chemicals), trimethylsilyldiazomethane (Nacalai Tesque; 10 wt% in hexane), triethylsilane (ShinEtsu), trifluoroacetic acid (Wako Chemicals), KO*t*-Bu (Wako Chemicals), NaH (Kanto Chemicals; 60 wt% in mineral oil), LiAlH<sub>4</sub> (Kanto Chemicals), HCl (TCI; 1.0 M solution in Et<sub>2</sub>O), KPF<sub>6</sub> (Aldrich), and HBF<sub>4</sub>*aq* (Wako Chemicals; 42 wt%) were used as received. CuCl (Kanto Chemicals) was washed with HCl<sub>aq</sub> and dried under vacuum prior to use.

Arylboronic acid neopentylglycol esters **2**,<sup>1</sup> CuOt-Bu(IPr),<sup>2</sup> and (*R,R*)-**7**<sup>3</sup> were synthesized following the literature procedures.

All other chemicals and solvents were purchased from Aldrich, Wako Chemicals, TCI, or Kanto Chemicals and used as received.

### II. Synthesis of Substrates and Ligand Salts

#### 5-Fluoro-1-tritylisatin (1a)

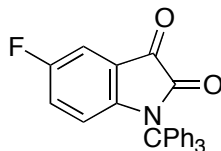

NaH (356 mg, 8.90 mmol; 60 wt% in mineral oil) was added portionwise to a solution of 5-fluoroisatin (1.32 g, 8.01 mmol) in DMF (8.0 mL), and the resulting mixture was stirred for 30 min at room temperature. Triphenylmethyl bromide (2.84 g, 8.78 mmol) was added to it

<sup>1</sup> H. Chaumeil, S. Signorella and C. Le Drian, *Tetrahedron* 2000, **56**, 9655.

<sup>2</sup> N. P. Mankad, D. S. Laitar and J. P. Sadighi, *Organometallics* 2004, **23**, 3369.

<sup>3</sup> T. J. Seiders, D. W. Ward and R. H. Grubbs, *Org. Lett.* 2001, **3**, 3225.

with additional DMF (2.0 mL), and the mixture was stirred for 2.5 h at room temperature. The reaction mixture was diluted with  $\text{CHCl}_3$  and washed with saturated NaCl aq. The organic layer was dried over  $\text{MgSO}_4$ , filtered, and concentrated under vacuum. The residue was chromatographed on silica gel with  $\text{CHCl}_3/\text{EtOAc}/\text{hexane} = 1/1/6$ , and the solid thus obtained was recrystallized from  $\text{CH}_2\text{Cl}_2/\text{hexane}$  to afford 5-fluoro-1-tritylisatin (2.72 g, 6.68 mmol; 83% yield) as an orange solid.

$^1\text{H}$  NMR ( $\text{CDCl}_3$ ):  $\delta$  7.42 (d,  $^3J_{\text{HH}} = 7.2$  Hz, 6H), 7.31-7.23 (m, 10H), 6.91 (td,  $^3J = 8.7$  Hz and  $^4J_{\text{HH}} = 2.9$  Hz, 1H), 6.35 (dd,  $^3J_{\text{HH}} = 8.9$  Hz and  $^4J_{\text{HF}} = 3.7$  Hz, 1H).  $^{13}\text{C}$  NMR ( $\text{CDCl}_3$ ):  $\delta$  182.5 (d,  $^4J_{\text{CF}} = 2.1$  Hz), 159.2 (d,  $^5J_{\text{CF}} = 2.1$  Hz), 158.8 (d,  $^1J_{\text{CF}} = 247$  Hz), 148.4 (d,  $^4J_{\text{CF}} = 2.1$  Hz), 141.0, 129.3, 128.1, 127.6, 123.3 (d,  $^2J_{\text{CF}} = 23.8$  Hz), 119.9 (d,  $^3J_{\text{CF}} = 6.2$  Hz), 119.0 (d,  $^3J_{\text{CF}} = 7.2$  Hz), 111.3 (d,  $^2J_{\text{CF}} = 23.8$  Hz), 75.7. Anal. Calcd for  $\text{C}_{27}\text{H}_{18}\text{FNO}_2$ : C, 79.59; H, 4.45. Found: C, 79.70; H, 4.35.

### 5-Methyl-1-tritylisatin (1b)

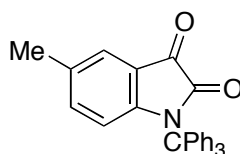

This was synthesized from 5-methylisatin, following the procedure for compound **1a**. Orange solid. 72% yield.

$^1\text{H}$  NMR ( $\text{CDCl}_3$ ):  $\delta$  7.44 (d,  $^3J_{\text{HH}} = 7.0$  Hz, 6H), 7.39 (dd,  $^4J_{\text{HH}} = 1.3$  Hz and  $^5J_{\text{HH}} = 0.6$  Hz, 1H), 7.27 (t,  $^3J_{\text{HH}} = 7.0$  Hz, 6H), 7.23 (tt,  $^3J_{\text{HH}} = 7.3$  Hz and  $^4J_{\text{HH}} = 1.3$  Hz, 3H), 6.99 (dd,  $^3J_{\text{HH}} = 8.4$  Hz and  $^4J_{\text{HH}} = 1.6$  Hz, 1H), 6.25 (d,  $^3J_{\text{HH}} = 8.3$  Hz, 1H), 2.23 (s, 3H).  $^{13}\text{C}$  NMR ( $\text{CDCl}_3$ ):  $\delta$  183.2, 159.6, 150.1, 141.3, 137.4, 133.1, 129.3, 128.0, 127.4, 125.0, 119.2, 117.5, 75.4, 20.4. Anal. Calcd for  $\text{C}_{28}\text{H}_{21}\text{NO}_2$ : C, 83.35; H, 5.25. Found: C, 83.14; H, 5.30.

### 6-Bromo-1-tritylisatin (1c)

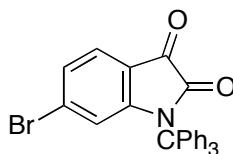

This was synthesized from 6-bromoisatin, following the procedure for compound **1a**. Yellow solid. 78% yield.

$^1\text{H}$  NMR ( $\text{CDCl}_3$ ):  $\delta$  7.45-7.40 (m, 7H), 7.30 (t,  $^3J_{\text{HH}} = 6.9$  Hz, 6H), 7.26 (tt,  $^3J_{\text{HH}} = 6.9$  Hz and  $^4J_{\text{HH}} = 1.3$  Hz, 3H), 7.16 (dd,  $^3J_{\text{HH}} = 7.9$  Hz and  $^4J_{\text{HH}} = 1.4$  Hz, 1H), 6.46 (d,  $^4J_{\text{HH}} = 1.3$  Hz, 1H).  $^{13}\text{C}$  NMR ( $\text{CDCl}_3$ ):  $\delta$  181.8, 159.2, 153.0, 140.8, 132.1, 129.3, 128.2, 127.7, 126.7, 125.6, 121.0, 117.9, 75.9. Anal. Calcd for  $\text{C}_{27}\text{H}_{18}\text{BrNO}_2$ : C, 69.24; H, 3.87. Found: C, 69.27; H, 3.86.

### 6-Chloro-1-tritylisatin (1d)

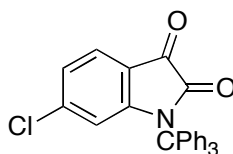

This was synthesized from 6-chloroisatin, following the procedure for compound **1a**. Yellow solid. 70% yield.

$^1\text{H}$  NMR ( $\text{CDCl}_3$ ):  $\delta$  7.52 (d,  $^3J_{\text{HH}} = 8.0$  Hz, 1H), 7.42 (d,  $^3J_{\text{HH}} = 7.3$  Hz, 6H), 7.30 (t,  $^3J_{\text{HH}}$

= 7.3 Hz, 6H), 7.26 (tt,  $^3J_{\text{HH}} = 7.1$  Hz and  $^4J_{\text{HH}} = 1.3$  Hz, 3H), 6.99 (dd,  $^3J_{\text{HH}} = 8.0$  Hz and  $^4J_{\text{HH}} = 1.6$  Hz, 1H), 6.31 (d,  $^3J_{\text{HH}} = 1.6$  Hz, 1H).  $^{13}\text{C}$  NMR ( $\text{CDCl}_3$ ):  $\delta$  181.5, 159.3, 153.2, 143.2, 140.8, 129.3, 128.2, 127.7, 125.7, 123.7, 118.1, 117.5, 75.8. Anal. Calcd for  $\text{C}_{27}\text{H}_{18}\text{ClNO}_2$ : C, 76.50; H, 4.28. Found: C, 76.50; H, 4.24.

### 1-Tritylisatin (1e; CAS 41128-14-7)

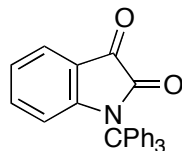

This was synthesized from isatin, following the procedure for compound **1a**. Yellow solid. 94% yield.

$^1\text{H}$  NMR ( $\text{CDCl}_3$ ):  $\delta$  7.59 (dd,  $^3J_{\text{HH}} = 7.6$  Hz and  $^4J_{\text{HH}} = 1.6$  Hz, 1H), 7.44 (d,  $^3J_{\text{HH}} = 7.2$  Hz, 6H), 7.28 (t,  $^3J_{\text{HH}} = 7.4$  Hz, 6H), 7.23 (t,  $^3J_{\text{HH}} = 7.3$  Hz, 3H), 7.19 (ddd,  $^3J_{\text{HH}} = 8.2$  and 7.5 Hz and  $^4J_{\text{HH}} = 1.1$  Hz, 1H), 6.99 (t,  $^3J_{\text{HH}} = 7.4$  Hz, 1H), 6.38 (d,  $^3J_{\text{HH}} = 8.3$  Hz, 1H).  $^{13}\text{C}$  NMR ( $\text{CDCl}_3$ ):  $\delta$  183.0, 159.4, 152.2, 141.2, 136.8, 129.3, 128.0, 127.4, 124.7, 123.3, 119.1, 117.7, 75.5.

### (S)-**8a**<sup>4</sup>

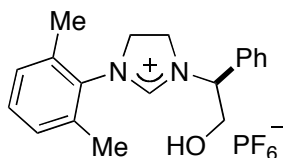

Ethyl chloroglyoxylate (2.47 mL, 22.0 mmol) was added dropwise to a solution of 2,6-dimethylaniline (2.42 g, 20.0 mmol) and pyridine (1.77 mL, 22.0 mmol) in  $\text{CH}_2\text{Cl}_2$  (20 mL) at 0 °C, and the resulting solution was stirred for 12 h at room temperature. The reaction mixture was diluted with EtOAc and washed successively with 1 M HCl<sub>aq</sub>, saturated  $\text{NaHCO}_3$ <sub>aq</sub>, and saturated NaCl<sub>aq</sub>. The organic layer was dried over  $\text{MgSO}_4$ , filtered, and concentrated under vacuum to afford ethyl 2,6-dimethylphenyloxamate as a pale pink solid (4.29 g, 19.4 mmol; 97% yield).

$^1\text{H}$  NMR ( $\text{CDCl}_3$ ):  $\delta$  8.40 (bs, 1H), 7.15 (dd,  $^3J_{\text{HH}} = 8.6$  and 6.3 Hz, 1H), 7.10 (d,  $^3J_{\text{HH}} = 7.4$  Hz, 2H), 4.43 (q,  $^3J_{\text{HH}} = 7.2$  Hz, 2H), 2.24 (s, 6H), 1.44 (t,  $^3J_{\text{HH}} = 7.1$  Hz, 3H).

A solution of ethyl 2,6-dimethylphenyloxamate (664 mg, 3.00 mmol) and (S)-phenylglycinol (454 mg, 3.31 mmol) in  $\text{CH}_2\text{Cl}_2$  (8.0 mL) was refluxed for 3 days. The reaction mixture was diluted with EtOAc and washed successively with 1 M HCl<sub>aq</sub> and saturated NaCl<sub>aq</sub>. The organic layer was dried over  $\text{MgSO}_4$ , filtered, and concentrated under vacuum to afford (S)-N-(2,6-dimethylphenyl)-N'-(2-hydroxy-1-phenylethyl)oxalamide as a white solid. This solid was added to a suspension of  $\text{LiAlH}_4$  (456 mg, 12.0 mmol) in THF (8.0 mL) at 0 °C, and the mixture was stirred for 20 h at 70 °C. The reaction was cooled to 0 °C, and  $\text{H}_2\text{O}$  (0.4 mL), 15% NaOH<sub>aq</sub> (0.4 mL), and  $\text{H}_2\text{O}$  (1.2 mL) were slowly added to it. The precipitate that formed was removed by filtration through celite with THF. The filtrate was concentrated under vacuum to afford (S)-N-(2,6-dimethylphenyl)-N'-(2-hydroxy-1-phenylethyl)ethylenediamine as a pale yellow oil (853 mg, 3.00 mmol; 100% yield).

$^1\text{H}$  NMR ( $\text{CDCl}_3$ ):  $\delta$  7.37-7.33 (m, 2H), 7.30-7.27 (m, 3H), 6.98 (d,  $^3J_{\text{HH}} = 7.4$  Hz, 2H), 6.81 (t,  $^3J_{\text{HH}} = 7.4$  Hz, 1H), 3.79 (dd,  $^3J_{\text{HH}} = 8.4$  and 4.5 Hz, 1H), 3.73 (dd,  $^2J_{\text{HH}} = 10.7$  Hz

<sup>4</sup> H. Clavier, L. Coutable, L. Toupet, J.-C. Guillemin and M. Mauduit, *J. Organomet. Chem.* 2005, **690**, 5237.

and  $^3J_{\text{HH}} = 4.5$  Hz, 1H), 3.58 (dd,  $^2J_{\text{HH}} = 10.7$  Hz and  $^3J_{\text{HH}} = 8.5$  Hz, 1H), 3.15-3.03 (m, 2H), 2.79 (ddd,  $^2J_{\text{HH}} = 12.1$  Hz and  $^3J_{\text{HH}} = 7.3$  and 4.5 Hz, 1H), 2.71 (ddd,  $^2J_{\text{HH}} = 12.0$  Hz and  $^3J_{\text{HH}} = 6.1$  and 4.7 Hz, 1H), 2.28 (s, 6H).

HCl (3.0 mL, 3.0 mmol; 1.0 M solution in Et<sub>2</sub>O) was added dropwise to a solution of (*S*)-*N*-(2,6-dimethylphenyl)-*N'*-(2-hydroxy-1-phenylethyl)ethylenediamine (853 mg, 3.00 mmol) in Et<sub>2</sub>O (10 mL) and the mixture was stirred for 5 min at room temperature. This was then diluted with hexane and the resulting precipitate was collected by filtration. The solid thus obtained was dissolved in toluene (6.0 mL), and trimethyl orthoformate (1.42 mL, 13.0 mmol) was added to it. This mixture was stirred for 20 h at 90 °C, and the solvent was removed under vacuum. The residue was then dissolved in H<sub>2</sub>O (20 mL) and washed with EtOAc. KPF<sub>6</sub> (1.11 g, 6.03 mmol) was added to the aqueous solution and the mixture was stirred for 12 h at room temperature. After extraction with CH<sub>2</sub>Cl<sub>2</sub>, the organic layer was dried over MgSO<sub>4</sub>, filtered, and concentrated under vacuum. The resulting solid was redissolved in CH<sub>2</sub>Cl<sub>2</sub> and diluted with hexane. The precipitate that formed was collected by filtration to afford compound (*S*)-**8a** as a white solid (689 mg, 1.56 mmol; 52% yield).  $[\alpha]^{20}_{\text{D}} +24.5$  (*c* 1.00, acetone).

<sup>1</sup>H NMR (acetone-*d*<sub>6</sub>): δ 8.90 (s, 1H), 7.57-7.54 (m, 2H), 7.52-7.44 (m, 3H), 7.34 (t,  $^3J_{\text{HH}} = 7.5$  Hz, 1H), 7.26 (d,  $^3J_{\text{HH}} = 7.6$  Hz, 2H), 5.17 (dd,  $^3J_{\text{HH}} = 9.3$  and 4.2 Hz, 1H), 4.82 (bs, 1H), 4.51-4.43 (m, 2H), 4.42-4.25 (m, 3H), 4.19 (ddd,  $^2J_{\text{HH}} = 11.6$  Hz and  $^3J_{\text{HH}} = 6.3$  and 3.9 Hz, 1H), 2.41 (s, 6H). <sup>13</sup>C NMR (acetone-*d*<sub>6</sub>): δ 159.8, 137.0, 135.1, 134.7, 131.0, 130.1, 130.03, 129.98, 128.7, 65.2, 61.9, 51.4, 48.6, 17.7. Anal. Calcd for C<sub>19</sub>H<sub>23</sub>F<sub>6</sub>N<sub>2</sub>OP: C, 51.82; H, 5.26. Found: C, 51.79; H, 5.17.

#### (*S*)-**8b**

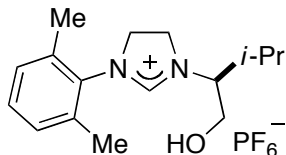

This was synthesized from (*S*)-valinol and ethyl 2,6-dimethylphenyloxamate, following the procedure for compound (*S*)-**8a**. White solid. 34% yield.  $[\alpha]^{20}_{\text{D}} -1.9$  (*c* 1.00, acetone).

<sup>1</sup>H NMR (acetone-*d*<sub>6</sub>): δ 8.70 (s, 1H), 7.33 (t,  $^3J_{\text{HH}} = 7.6$  Hz, 1H), 7.25 (d,  $^3J_{\text{HH}} = 7.7$  Hz, 2H), 4.54-4.50 (m, 1H), 4.50-4.45 (m, 4H), 4.04-3.98 (m, 1H), 3.94-3.87 (m, 1H), 3.69 (ddd,  $^2J_{\text{HH}} = 10.2$  Hz and  $^3J_{\text{HH}} = 8.2$  and 3.8 Hz, 1H), 2.39 (s, 6H), 2.26-2.14 (m, 1H), 1.15 (d,  $^3J_{\text{HH}} = 6.7$  Hz, 3H), 1.07 (d,  $^3J_{\text{HH}} = 6.6$  Hz, 3H). <sup>13</sup>C NMR (acetone-*d*<sub>6</sub>): δ 160.3, 137.0, 134.6, 130.9, 130.0, 68.2, 59.6, 51.3, 47.7, 28.0, 20.1, 19.3, 17.6. Anal. Calcd for C<sub>16</sub>H<sub>25</sub>F<sub>6</sub>N<sub>2</sub>OP: C, 47.29; H, 6.20. Found: C, 47.38; H, 6.19.

#### (*S*)-**8c**

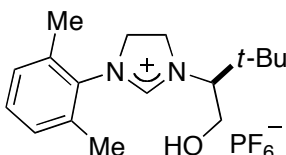

This was synthesized from (*S*)-*tert*-leucinol and ethyl 2,6-dimethylphenyloxamate, following the procedure for compound (*S*)-**8a**. White solid. 50% yield.  $[\alpha]^{20}_{\text{D}} +11.3$  (*c* 1.00, acetone).

<sup>1</sup>H NMR (acetone-*d*<sub>6</sub>): δ 8.73 (s, 1H), 7.33 (t,  $^3J_{\text{HH}} = 7.6$  Hz, 1H), 7.26 (d,  $^3J_{\text{HH}} = 7.6$  Hz, 2H), 4.61-4.45 (m, 5H), 4.10-4.05 (m, 1H), 3.99 (ddd,  $^2J_{\text{HH}} = 11.7$  Hz and  $^3J_{\text{HH}} = 10.3$  and 5.6

Hz, 1H), 3.80 (dd,  $^3J_{\text{HH}} = 10.3$  and  $3.9$  Hz, 1H), 2.38 (s, 6H), 1.15 (s, 9H).  $^{13}\text{C}$  NMR (acetone- $d_6$ ):  $\delta$  161.2, 136.9, 134.5, 130.9, 130.0, 71.4, 58.0, 51.5, 49.9, 34.2, 27.5, 17.6. Anal. Calcd for  $\text{C}_{17}\text{H}_{27}\text{F}_6\text{N}_2\text{OP}$ : C, 48.57; H, 6.47. Found: C, 48.34; H, 6.41.

**(S)-8d**

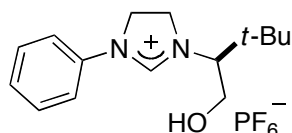

This was synthesized from aniline and ethyl chloroglyoxylate, following the procedure for compound (S)-8a. White solid. 45% yield.  $[\alpha]_{\text{D}}^{20} +8.0$  (c 1.00, acetone).

$^1\text{H}$  NMR (acetone- $d_6$ ):  $\delta$  9.21 (s, 1H), 7.54-7.47 (m, 4H), 7.36 (tt,  $^3J_{\text{HH}} = 7.1$  Hz and  $^4J_{\text{HH}} = 1.3$  Hz, 1H), 4.73-4.63 (m, 2H), 4.55-4.43 (m, 2H), 4.35 (t,  $^3J_{\text{HH}} = 5.2$  Hz, 1H), 4.08-3.99 (m, 2H), 3.84 (dd,  $^3J_{\text{HH}} = 9.3$  and  $4.5$  Hz, 1H), 1.14 (s, 9H).  $^{13}\text{C}$  NMR (acetone- $d_6$ ):  $\delta$  156.5, 137.3, 130.8, 127.7, 118.8, 72.2, 58.3, 49.8, 49.3, 34.4, 27.5. Anal. Calcd for  $\text{C}_{15}\text{H}_{23}\text{F}_6\text{N}_2\text{OP}$ : C, 45.92; H, 5.91. Found: C, 45.66; H, 5.73.

**(S)-8e**

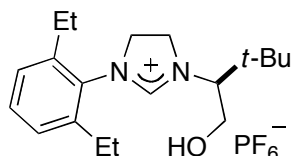

This was synthesized from 2,6-diethylaniline and ethyl chloroglyoxylate, following the procedure for compound (S)-8a. White amorphous. 25% yield.  $[\alpha]_{\text{D}}^{20} +7.5$  (c 0.84, acetone).

$^1\text{H}$  NMR (acetone- $d_6$ ):  $\delta$  8.75 (s, 1H), 7.45 (t,  $^3J_{\text{HH}} = 7.7$  Hz, 1H), 7.32 (d,  $^3J_{\text{HH}} = 7.7$  Hz, 2H), 4.62-4.45 (m, 5H), 4.06 (dt,  $^2J_{\text{HH}} = 11.9$  Hz and  $^3J_{\text{HH}} = 4.0$  Hz, 1H), 3.99 (ddd,  $^2J_{\text{HH}} = 11.7$  Hz and  $^3J_{\text{HH}} = 11.0$  and  $5.7$  Hz, 1H), 3.82 (dd,  $^3J_{\text{HH}} = 10.4$  and  $4.0$  Hz, 1H), 2.74 (q,  $^3J_{\text{HH}} = 7.9$  Hz, 2H), 2.72 (q,  $^3J_{\text{HH}} = 7.9$  Hz, 2H), 1.25 (t,  $^3J_{\text{HH}} = 7.4$  Hz, 3H), 1.24 (t,  $^3J_{\text{HH}} = 7.6$  Hz, 3H), 1.15 (s, 9H).  $^{13}\text{C}$  NMR (acetone- $d_6$ ):  $\delta$  161.3, 142.94, 142.92, 133.1, 131.5, 128.30, 128.26, 71.5, 57.9, 53.0, 50.0, 34.3, 27.5, 24.6, 24.5, 15.6, 15.5. HRMS (ESI-TOF) calcd for  $\text{C}_{19}\text{H}_{31}\text{N}_2\text{O}$  (M- $\text{PF}_6^-$ ) 303.2431, found 303.2430.

**(S)-8f**

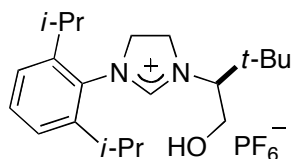

This was synthesized from 2,6-diisopropylaniline and ethyl chloroglyoxylate, following the procedure for compound (S)-8a. Pale yellow solid. 17% yield.  $[\alpha]_{\text{D}}^{20} +6.5$  (c 0.99, acetone).

$^1\text{H}$  NMR (acetone- $d_6$ ):  $\delta$  8.81 (s, 1H), 7.53 (t,  $^3J_{\text{HH}} = 7.8$  Hz, 1H), 7.39 (d,  $^3J_{\text{HH}} = 7.5$  Hz, 2H), 4.64-4.44 (m, 5H), 4.08-4.04 (m, 1H), 3.99 (ddd,  $^2J_{\text{HH}} = 11.7$  Hz and  $^3J_{\text{HH}} = 10.2$  and  $5.7$  Hz, 1H), 3.82 (dd,  $^3J_{\text{HH}} = 10.4$  and  $4.1$  Hz, 1H), 3.20-3.11 (m, 2H), 1.31 (d,  $^3J_{\text{HH}} = 6.8$  Hz, 3H), 1.30 (d,  $^3J_{\text{HH}} = 6.8$  Hz, 3H), 1.23 (d,  $^3J_{\text{HH}} = 6.7$  Hz, 3H), 1.22 (d,  $^3J_{\text{HH}} = 6.8$  Hz, 3H), 1.14 (s, 9H).  $^{13}\text{C}$  NMR (acetone- $d_6$ ):  $\delta$  161.3, 147.8, 147.7, 131.9, 131.4, 125.69, 125.66, 71.5, 57.8, 54.2, 49.9, 34.3, 29.3, 29.2, 27.5, 25.10, 25.05, 23.99, 23.96. Anal. Calcd for  $\text{C}_{21}\text{H}_{35}\text{F}_6\text{N}_2\text{OP}$ : C, 52.94; H, 7.40. Found: C, 52.87; H, 7.31.

**(S)-9**

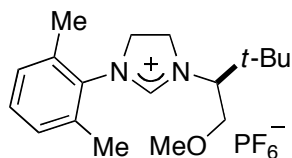

Trimethylsilyldiazomethane (1.0 mL, 0.60 mmol; 10 wt% in hexane) was added dropwise to a solution of compound (*S*)-**8c** (63.1 mg, 0.150 mmol) and HBF<sub>4</sub>*aq* (32.0 mg, 0.150 mmol; 42 wt%) in CH<sub>2</sub>Cl<sub>2</sub> (1.0 mL) at 0 °C. The reaction mixture was stirred for 10 min at 0 °C and it was poured into H<sub>2</sub>O. After extraction with CH<sub>2</sub>Cl<sub>2</sub>, the organic layer was dried over MgSO<sub>4</sub>, filtered, and concentrated under vacuum. The residue was chromatographed on silica gel with acetone/CH<sub>2</sub>Cl<sub>2</sub> = 1/5 to afford compound (*S*)-**9** as a white solid (54.9 mg, 0.126 mmol; 84% yield). [ $\alpha$ ]<sub>D</sub><sup>20</sup> -2.1 (*c* 0.50, acetone).

<sup>1</sup>H NMR (acetone-*d*<sub>6</sub>):  $\delta$  8.72 (s, 1H), 7.34 (t, <sup>3</sup>*J*<sub>HH</sub> = 7.6 Hz, 1H), 7.26 (d, <sup>3</sup>*J*<sub>HH</sub> = 8.1 Hz, 2H), 4.58-4.46 (m, 4H), 3.93 (dd, <sup>2</sup>*J*<sub>HH</sub> = 9.6 Hz and <sup>3</sup>*J*<sub>HH</sub> = 2.5 Hz, 1H), 3.90 (dd, <sup>2</sup>*J*<sub>HH</sub> = 9.8 Hz and <sup>3</sup>*J*<sub>HH</sub> = 8.9 Hz, 1H), 3.85 (dd, <sup>3</sup>*J*<sub>HH</sub> = 8.9 and 2.4 Hz, 1H), 3.45 (s, 3H), 2.38 (s, 6H), 1.16 (s, 9H). <sup>13</sup>C NMR (acetone-*d*<sub>6</sub>):  $\delta$  161.1, 136.9, 134.5, 131.1, 130.0, 68.9, 68.4, 59.0, 51.5, 50.4, 34.4, 27.5, 17.6. HRMS (ESI-TOF) calcd for C<sub>18</sub>H<sub>29</sub>N<sub>2</sub>O (M-PF<sub>6</sub><sup>-</sup>) 289.2274, found 289.2275.

### III. Catalytic and Stoichiometric Reactions

#### Procedure for Equation 1.

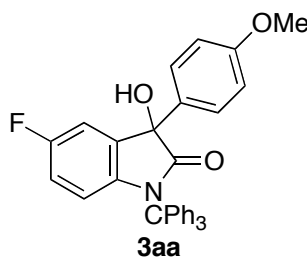

A solution of CuOt-Bu(IPr) (10.5 mg, 20.0  $\mu$ mol), isatin **1a** (81.5 mg, 0.200 mmol), 4-methoxyphenylboronate **2a** (52.8 mg, 0.240 mmol), and KOt-Bu (22.4 mg, 0.200 mmol) in dioxane (1.0 mL) was stirred for 15 h at 30 °C. The reaction was quenched with H<sub>2</sub>O (60  $\mu$ L), and this was passed through a pad of silica gel with EtOAc. The solvent was removed under vacuum, and the residue was purified by silica gel preparative TLC with EtOAc/hexane = 1/2 to afford product **3aa** as a white solid (84.7 mg, 0.164 mmol; 82% yield).

<sup>1</sup>H NMR (CDCl<sub>3</sub>):  $\delta$  7.39-7.34 (m, 8H), 7.25-7.18 (m, 9H), 7.01 (dd, <sup>3</sup>*J*<sub>HF</sub> = 7.4 Hz and <sup>4</sup>*J*<sub>HH</sub> = 2.8 Hz, 1H), 6.92 (d, <sup>3</sup>*J*<sub>HH</sub> = 8.8 Hz, 2H), 6.64 (td, <sup>3</sup>*J* = 9.0 Hz and <sup>4</sup>*J*<sub>HH</sub> = 2.7 Hz, 1H), 6.28 (dd, <sup>3</sup>*J*<sub>HH</sub> = 8.9 Hz and <sup>4</sup>*J*<sub>HF</sub> = 4.0 Hz, 1H), 3.83 (s, 3H), 3.13 (s, 1H). <sup>13</sup>C NMR (CDCl<sub>3</sub>):  $\delta$  179.5, 159.9, 159.1 (d, <sup>1</sup>*J*<sub>CF</sub> = 243 Hz), 141.7, 139.0 (d, <sup>4</sup>*J*<sub>CF</sub> = 2.1 Hz), 133.6 (d, <sup>3</sup>*J*<sub>CF</sub> = 7.2 Hz), 132.2, 129.2, 127.9, 127.2, 127.0, 117.1 (d, <sup>3</sup>*J*<sub>CF</sub> = 7.2 Hz), 114.8 (d, <sup>2</sup>*J*<sub>CF</sub> = 22.7 Hz), 114.3, 112.2 (d, <sup>2</sup>*J*<sub>CF</sub> = 24.8 Hz), 77.4, 74.7, 55.4. Anal. Calcd for C<sub>34</sub>H<sub>26</sub>FNO<sub>3</sub>: C, 79.21; H, 5.08. Found: C, 78.91; H, 4.95.

### Procedure for Equation 2.<sup>5</sup>

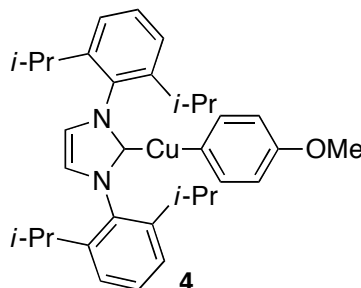

4-Methoxyphenylboronate **2a** (220 mg, 1.00 mmol) was added to a solution of CuOt-Bu(IPr) (525 mg, 1.00 mmol) in dioxane (10 mL) at room temperature. The reaction mixture was stirred for 30 min at 30 °C, and then the solvent was removed under vacuum. The residue was washed with hexane to afford compound **4** (CAS 1064085-74-0) as a pale yellow solid (489 mg, 0.874 mmol; 87% yield).

<sup>1</sup>H NMR (C<sub>6</sub>D<sub>6</sub>): δ 7.54 (d, <sup>3</sup>J<sub>HH</sub> = 8.3 Hz, 2H), 7.24 (t, <sup>3</sup>J<sub>HH</sub> = 7.8 Hz, 2H), 7.10 (d, <sup>3</sup>J<sub>HH</sub> = 7.8 Hz, 4H), 6.90 (d, <sup>3</sup>J<sub>HH</sub> = 8.3 Hz, 2H), 6.31 (s, 2H), 3.39 (s, 3H), 2.66 (sept, <sup>3</sup>J<sub>HH</sub> = 6.8 Hz, 4H), 1.43 (d, <sup>3</sup>J<sub>HH</sub> = 6.8 Hz, 12H), 1.11 (d, <sup>3</sup>J<sub>HH</sub> = 6.8 Hz, 12H). <sup>13</sup>C NMR (C<sub>6</sub>D<sub>6</sub>): δ 186.1, 158.0, 155.8, 145.9, 141.1, 135.4, 130.5, 124.2, 122.3, 112.6, 54.4, 29.1, 25.2, 23.7.

### Procedure for Equation 3.

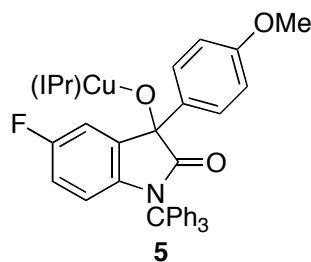

A solution of isatin **1a** (112 mg, 0.200 mmol) and compound **4** (81.5 mg, 0.200 mmol) in dioxane (2.0 mL) was stirred for 30 min at 30 °C. The solvent was removed under vacuum to afford compound **5** as a pale yellow solid (203 mg, 0.199 mmol; 99% yield). The structure was confirmed by X-ray crystallographic analysis after recrystallization from *n*-Bu<sub>2</sub>O/pentane at room temperature.

<sup>1</sup>H NMR (C<sub>6</sub>D<sub>6</sub>): δ 7.50-7.46 (m, 8H), 7.30 (t, <sup>3</sup>J<sub>HH</sub> = 7.8 Hz, 2H), 7.12 (d, <sup>3</sup>J<sub>HH</sub> = 8.0 Hz, 2H), 7.10 (d, <sup>3</sup>J<sub>HH</sub> = 8.2 Hz, 2H), 7.03-7.00 (m, 1H), 7.00 (t, <sup>3</sup>J<sub>HH</sub> = 7.6 Hz, 6H), 6.94 (t, <sup>3</sup>J<sub>HH</sub> = 7.3 Hz, 3H), 6.67 (d, <sup>3</sup>J<sub>HH</sub> = 8.8 Hz, 2H), 6.30-6.23 (m, 2H), 6.27 (s, 2H), 3.44 (s, 3H), 2.64-2.56 (m, 4H), 1.31 (d, <sup>3</sup>J<sub>HH</sub> = 6.8 Hz, 6H), 1.21 (d, <sup>3</sup>J<sub>HH</sub> = 6.9 Hz, 6H), 1.09 (d, <sup>3</sup>J<sub>HH</sub> = 6.9 Hz, 6H), 1.05 (d, <sup>3</sup>J<sub>HH</sub> = 6.8 Hz, 6H). <sup>13</sup>C NMR (C<sub>6</sub>D<sub>6</sub>): δ 186.2, 183.6, 159.3 (d, <sup>1</sup>J<sub>CF</sub> = 241 Hz), 158.6, 145.9, 143.7, 142.9, 141.6, 138.8, 135.5, 130.5, 129.8, 127.8, 127.6, 126.4, 124.3 (d, <sup>3</sup>J<sub>CF</sub> = 7.2 Hz), 122.5, 115.8 (d, <sup>3</sup>J<sub>CF</sub> = 6.2 Hz), 113.5, 112.3 (d, <sup>2</sup>J<sub>CF</sub> = 23.8 Hz), 111.8 (d, <sup>2</sup>J<sub>CF</sub> = 23.8 Hz), 83.0, 74.2, 54.8, 29.0, 24.9, 24.7, 24.1, 24.0. HRMS (ESI-TOF) calcd for C<sub>61</sub>H<sub>62</sub>CuFN<sub>3</sub>O<sub>3</sub> (M+H<sup>+</sup>) 966.4066, found 966.4091.

<sup>5</sup> T. Ohnishi, M. Nishiura and Z. Hou, *Angew. Chem., Int. Ed.* 2008, **47**, 5792.

### General Procedure for Table 2.

A solution of CuCl (3.0 mg, 30  $\mu$ mol), (*S*)-**8c** (13.9 mg, 33  $\mu$ mol), and KO*t*-Bu (40.4 mg, 0.36 mmol) in THF (0.75 mL) was stirred for 15 min at room temperature. The solvent was removed under vacuum and the residue was dissolved in dioxane (0.75 mL). Arylboronate **2** (0.36 mmol) was added to it and the mixture was stirred for 5 min at room temperature. Isatin **1** (0.30 mmol) was then added to this mixture with additional dioxane (0.75 mL), and the resulting mixture was stirred for 15 h at 30 °C. The reaction was quenched with H<sub>2</sub>O (90  $\mu$ L) and this was passed through a pad of silica gel with EtOAc. The solvent was removed under vacuum, and the residue was purified by silica gel preparative TLC with EtOAc/hexane to afford product **3**.

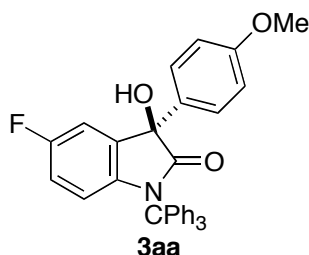

**Entry 1.** White solid. 80% yield. The ee was determined on a Daicel Chiralcel OD-H column with hexane/2-propanol = 90/10, flow = 0.5 mL/min. Retention times: 19.9 min [major enantiomer], 34.3 min [minor enantiomer]. 88% ee.  $[\alpha]^{20}_{\text{D}} -5.0$  (*c* 0.98, CHCl<sub>3</sub>). The absolute configuration was assigned by analogy with entry 10.

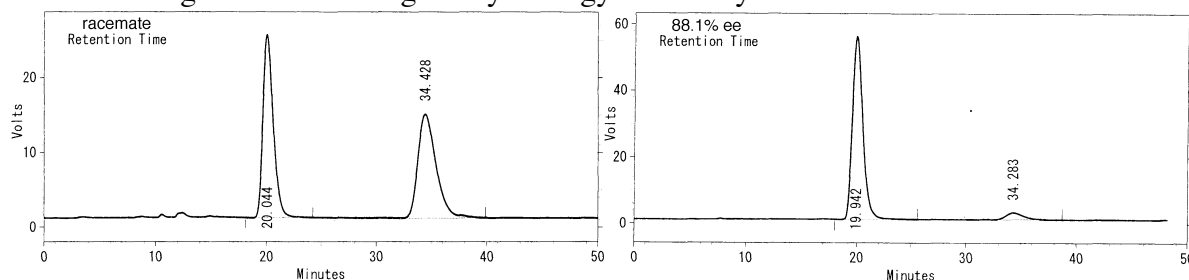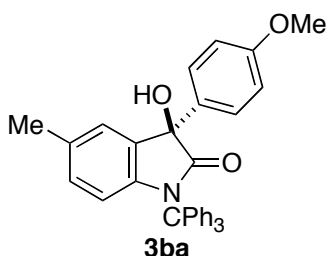

**Entry 2.** Pale yellow solid. 67% yield. The ee was determined on a Daicel Chiralcel OD-H column with hexane/2-propanol = 90/10, flow = 0.8 mL/min. Retention times: 8.8 min [major enantiomer], 15.1 min [minor enantiomer]. 85% ee.  $[\alpha]^{20}_{\text{D}} -42.6$  (*c* 0.50, CHCl<sub>3</sub>). The absolute configuration was assigned by analogy with entry 10.

<sup>1</sup>H NMR (CDCl<sub>3</sub>):  $\delta$  7.39 (d, <sup>3</sup>*J*<sub>HH</sub> = 7.2 Hz, 6H), 7.36 (d, <sup>3</sup>*J*<sub>HH</sub> = 8.8 Hz, 2H), 7.22 (t, <sup>3</sup>*J*<sub>HH</sub> = 7.3 Hz, 6H), 7.17 (t, <sup>3</sup>*J*<sub>HH</sub> = 7.1 Hz, 3H), 7.09 (d, <sup>4</sup>*J*<sub>HH</sub> = 1.3 Hz, 1H), 6.90 (d, <sup>3</sup>*J*<sub>HH</sub> = 8.8 Hz, 2H), 6.74 (dd, <sup>3</sup>*J*<sub>HH</sub> = 8.4 Hz and <sup>4</sup>*J*<sub>HH</sub> = 1.3 Hz, 1H), 6.22 (d, <sup>3</sup>*J*<sub>HH</sub> = 8.3 Hz, 1H), 3.81 (s, 3H), 3.13 (s, 1H), 2.20 (s, 3H). <sup>13</sup>C NMR (CDCl<sub>3</sub>):  $\delta$  179.7, 159.7, 142.0, 140.9, 132.9, 132.7, 131.9, 129.3, 128.8, 127.9, 127.1, 127.0, 125.1, 116.1, 114.2, 77.4, 74.5, 55.5, 20.9. Anal. Calcd for C<sub>35</sub>H<sub>29</sub>NO<sub>3</sub>: C, 82.17; H, 5.71. Found: C, 82.03; H, 5.86.



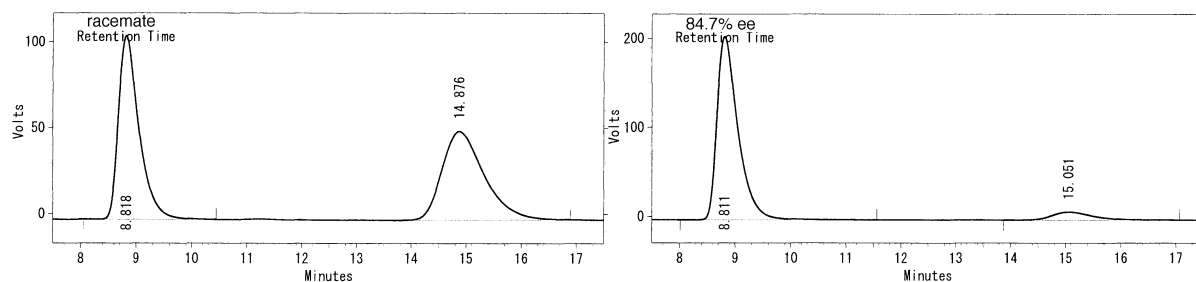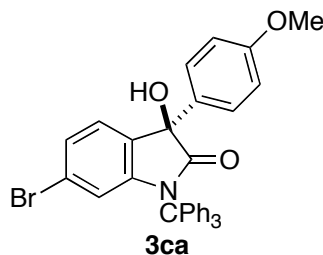

**Entry 3.** Pale yellow solid. 83% yield. The ee was determined on a Daicel Chiralcel OD-H column with hexane/2-propanol = 90/10, flow = 0.8 mL/min. Retention times: 10.4 min [major enantiomer], 16.6 min [minor enantiomer]. 89% ee.  $[\alpha]_D^{20} -50.2$  (*c* 1.00, CHCl<sub>3</sub>). The absolute configuration was assigned by analogy with entry 10.

<sup>1</sup>H NMR (CDCl<sub>3</sub>): δ 7.36 (d, <sup>3</sup>*J*<sub>HH</sub> = 7.2 Hz, 6H), 7.32 (d, <sup>3</sup>*J*<sub>HH</sub> = 8.8 Hz, 2H), 7.26-7.20 (m, 9H), 7.14 (d, <sup>3</sup>*J*<sub>HH</sub> = 7.9 Hz, 1H), 7.11 (d, <sup>3</sup>*J*<sub>HH</sub> = 7.9 Hz, 1H), 6.90 (d, <sup>3</sup>*J*<sub>HH</sub> = 8.8 Hz, 2H), 6.42 (s, 1H), 3.82 (s, 3H), 3.10 (s, 1H). <sup>13</sup>C NMR (CDCl<sub>3</sub>): δ 179.3, 159.8, 144.5, 141.5, 132.0, 130.9, 129.1, 128.0, 127.2, 127.0, 125.9, 125.7, 121.9, 119.2, 114.2, 76.9, 74.7, 55.4. Anal. Calcd for C<sub>34</sub>H<sub>26</sub>BrNO<sub>3</sub>: C, 70.84; H, 4.55. Found: C, 70.68; H, 4.54.

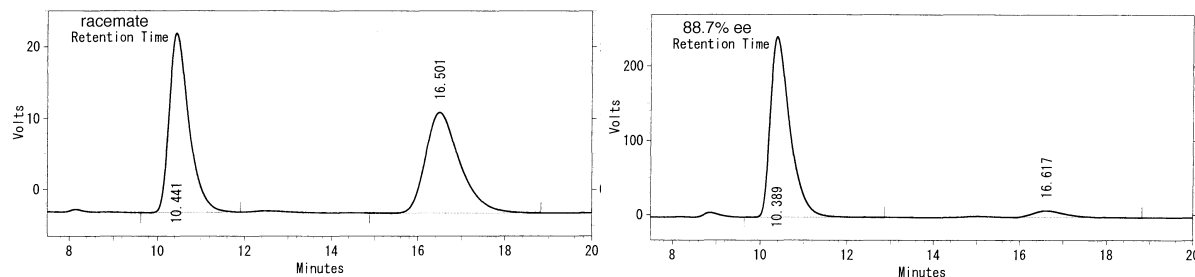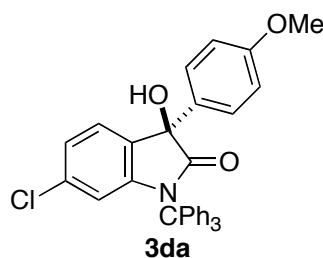

**Entry 4.** Pale yellow solid. 70% yield. The ee was determined on a Daicel Chiralcel OD-H column with hexane/2-propanol = 90/10, flow = 0.5 mL/min. Retention times: 19.3 min [major enantiomer], 29.7 min [minor enantiomer]. 89% ee.  $[\alpha]_D^{20} -40.5$  (*c* 0.99, CHCl<sub>3</sub>). The absolute configuration was assigned by analogy with entry 10.

<sup>1</sup>H NMR (CDCl<sub>3</sub>): δ 7.36 (d, <sup>3</sup>*J*<sub>HH</sub> = 7.1 Hz, 6H), 7.32 (d, <sup>3</sup>*J*<sub>HH</sub> = 8.9 Hz, 2H), 7.27-7.18 (m, 10H), 6.96 (dd, <sup>3</sup>*J*<sub>HH</sub> = 8.1 Hz and <sup>4</sup>*J*<sub>HH</sub> = 1.8 Hz, 1H), 6.90 (d, <sup>3</sup>*J*<sub>HH</sub> = 8.8 Hz, 2H), 6.28 (d, <sup>4</sup>*J*<sub>HH</sub> = 1.7 Hz, 1H), 3.82 (s, 3H), 3.11 (s, 1H). <sup>13</sup>C NMR (CDCl<sub>3</sub>): δ 179.4, 159.8, 144.4, 141.5, 133.9, 132.1, 130.3, 129.1, 128.0, 127.2, 127.0, 125.4, 123.0, 116.5, 114.2, 76.9, 74.7, 55.4. Anal. Calcd for C<sub>34</sub>H<sub>26</sub>ClNO<sub>3</sub>: C, 76.76; H, 4.93. Found: C, 76.50; H, 4.90.

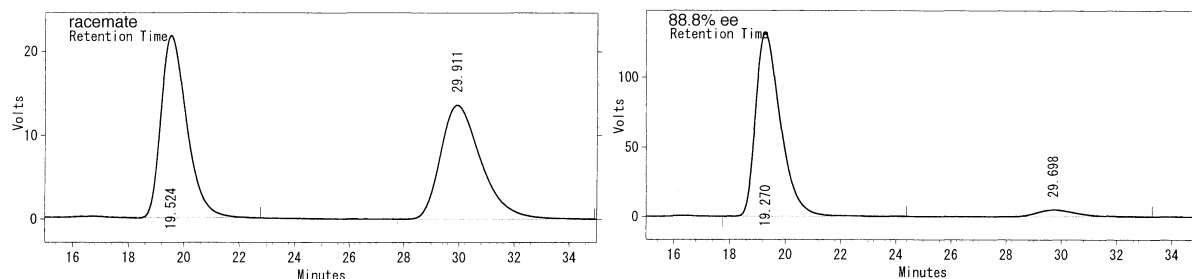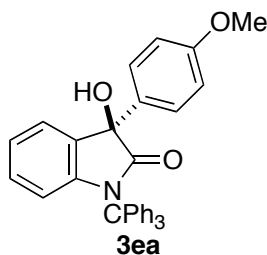

**Entry 5.** The reaction was conducted for 36 h. Pale yellow solid. 76% yield. The ee was determined on a Daicel Chiralcel OD-H column with hexane/2-propanol = 90/10, flow = 0.5 mL/min. Retention times: 19.6 min [major enantiomer], 32.8 min [minor enantiomer]. 85% ee.  $[\alpha]_D^{20}$  -18.4 (*c* 1.01, CHCl<sub>3</sub>). The absolute configuration was assigned by analogy with entry 10.

<sup>1</sup>H NMR (CDCl<sub>3</sub>): δ 7.39 (d, <sup>3</sup>*J*<sub>HH</sub> = 7.1 Hz, 6H), 7.36 (d, <sup>3</sup>*J*<sub>HH</sub> = 8.8 Hz, 2H), 7.28 (dd, <sup>3</sup>*J*<sub>HH</sub> = 6.7 Hz and <sup>4</sup>*J*<sub>HH</sub> = 1.7 Hz, 1H), 7.23 (t, <sup>3</sup>*J*<sub>HH</sub> = 7.3 Hz, 6H), 7.19 (t, <sup>3</sup>*J*<sub>HH</sub> = 7.1 Hz, 3H), 6.99-6.93 (m, 2H), 6.91 (d, <sup>3</sup>*J*<sub>HH</sub> = 8.8 Hz, 2H), 6.35 (dd, <sup>3</sup>*J*<sub>HH</sub> = 7.5 Hz and <sup>4</sup>*J*<sub>HH</sub> = 1.2 Hz, 1H), 3.82 (s, 3H), 3.10 (s, 1H). <sup>13</sup>C NMR (CDCl<sub>3</sub>): δ 179.7, 159.8, 143.3, 142.0, 132.7, 131.9, 129.3, 128.3, 127.9, 127.11, 127.06, 124.5, 123.0, 116.2, 114.2, 77.3, 74.5, 55.4. Anal. Calcd for C<sub>34</sub>H<sub>27</sub>NO<sub>3</sub>: C, 82.07; H, 5.47. Found: C, 81.80; H, 5.41.

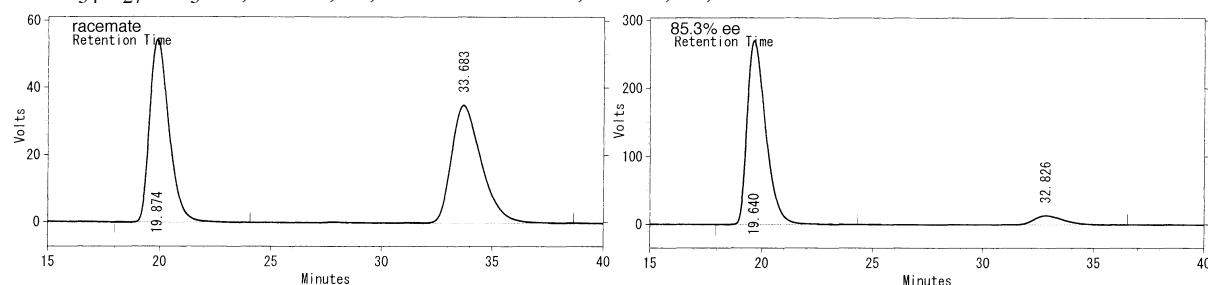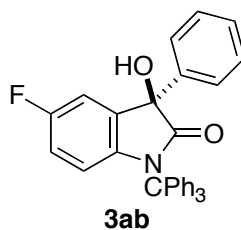

**Entry 6.** White solid. 74% yield. The ee was determined on a Daicel Chiralcel OD-H column with hexane/2-propanol = 90/10, flow = 0.5 mL/min. Retention times: 11.3 min [major enantiomer], 14.0 min [minor enantiomer]. 91% ee.  $[\alpha]_D^{20}$  +4.0 (*c* 0.98, CHCl<sub>3</sub>). The absolute configuration was assigned by analogy with entry 10.

<sup>1</sup>H NMR (CDCl<sub>3</sub>): δ 7.44-7.34 (m, 11H), 7.26-7.19 (m, 9H), 6.98 (dd, <sup>3</sup>*J*<sub>HF</sub> = 7.4 Hz and <sup>4</sup>*J*<sub>HH</sub> = 2.8 Hz, 1H), 6.65 (td, <sup>3</sup>*J* = 8.9 Hz and <sup>4</sup>*J*<sub>HH</sub> = 2.8 Hz, 1H), 6.30 (dd, <sup>3</sup>*J*<sub>HH</sub> = 9.0 Hz and <sup>4</sup>*J*<sub>HF</sub> = 4.1 Hz, 1H), 3.21 (s, 1H). <sup>13</sup>C NMR (CDCl<sub>3</sub>): δ 179.3, 159.1 (d, <sup>1</sup>*J*<sub>CF</sub> = 244 Hz), 141.7,

140.2, 139.1 (d,  $^4J_{\text{CF}} = 3.1$  Hz), 133.6 (d,  $^3J_{\text{CF}} = 8.3$  Hz), 129.2, 128.9, 128.6, 127.9, 127.2, 125.4, 117.2 (d,  $^3J_{\text{CF}} = 7.2$  Hz), 114.9 (d,  $^2J_{\text{CF}} = 22.7$  Hz), 112.3 (d,  $^2J_{\text{CF}} = 23.8$  Hz), 77.8 (d,  $^4J_{\text{CF}} = 2.1$  Hz), 74.8. Anal. Calcd for  $\text{C}_{33}\text{H}_{24}\text{FNO}_2$ : C, 81.63; H, 4.98. Found: C, 81.73; H, 5.01.

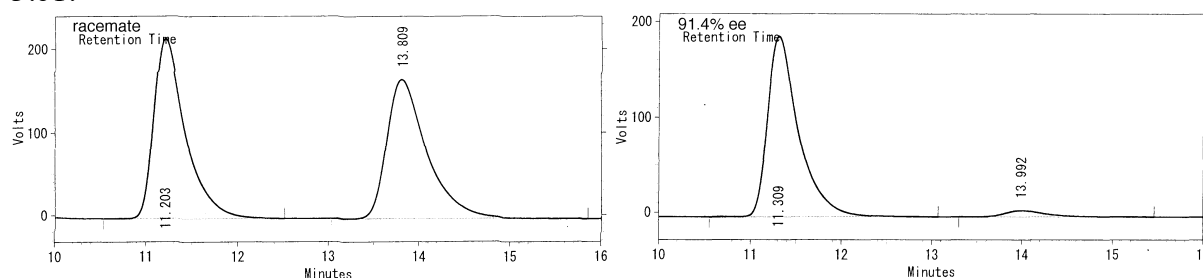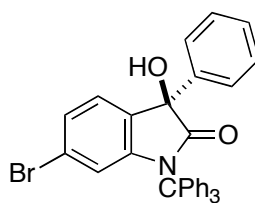

**3cb**

**Entry 7.** White solid. 83% yield. The ee was determined on a Daicel Chiralcel OD-H column with hexane/2-propanol = 95/5, flow = 0.5 mL/min. Retention times: 19.5 min [major enantiomer], 26.0 min [minor enantiomer]. 92% ee.  $[\alpha]_{\text{D}}^{20} -19.3$  (*c* 0.50,  $\text{CHCl}_3$ ). The absolute configuration was assigned by analogy with entry 10.

$^1\text{H}$  NMR ( $\text{CDCl}_3$ ):  $\delta$  7.41-7.34 (m, 11H), 7.28-7.21 (m, 9H), 7.119 (s, 1H), 7.117 (s, 1H), 6.44 (s, 1H), 3.14 (s, 1H).  $^{13}\text{C}$  NMR ( $\text{CDCl}_3$ ):  $\delta$  179.2, 144.7, 141.5, 140.1, 130.8, 129.2, 128.9, 128.7, 128.0, 127.4, 126.1, 125.8, 125.5, 122.1, 119.4, 77.4, 74.9. Anal. Calcd for  $\text{C}_{33}\text{H}_{24}\text{BrNO}_2$ : C, 72.53; H, 4.43. Found: C, 72.41; H, 4.37.

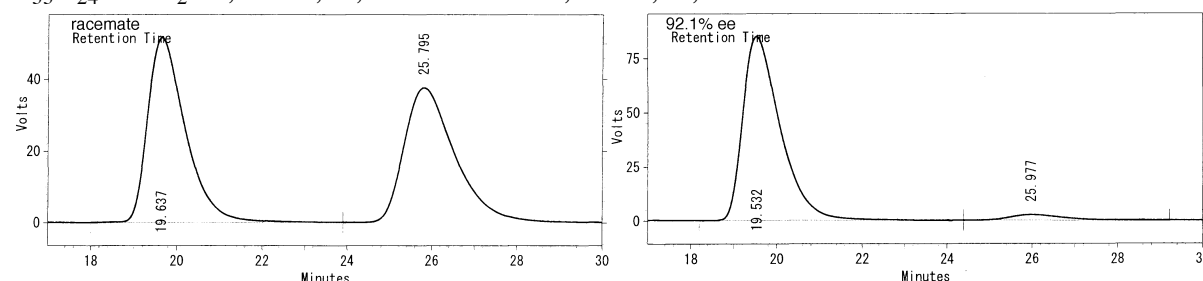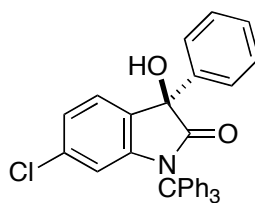

**3db**

**Entry 8.** Pale yellow solid. 87% yield. The ee was determined on a Daicel Chiralcel OD-H column with hexane/2-propanol = 95/5, flow = 0.5 mL/min. Retention times: 18.0 min [major enantiomer], 23.3 min [minor enantiomer]. 92% ee.  $[\alpha]_{\text{D}}^{20} -32.5$  (*c* 0.50,  $\text{CHCl}_3$ ). The absolute configuration was assigned by analogy with entry 10.

$^1\text{H}$  NMR ( $\text{CDCl}_3$ ):  $\delta$  7.41-7.34 (m, 11H), 7.28-7.20 (m, 9H), 7.18 (d,  $^3J_{\text{HH}} = 7.9$  Hz, 1H), 6.96 (dd,  $^3J_{\text{HH}} = 7.9$  Hz and  $^4J_{\text{HH}} = 1.8$  Hz, 1H), 6.30 (d,  $^4J_{\text{HH}} = 1.7$  Hz, 1H), 3.15 (s, 1H).  $^{13}\text{C}$  NMR ( $\text{CDCl}_3$ ):  $\delta$  179.3, 144.6, 141.5, 140.2, 134.2, 130.3, 129.2, 128.9, 128.7, 128.0, 127.3,

125.5, 125.4, 123.2, 116.6, 77.3, 74.9. Anal. Calcd for C<sub>33</sub>H<sub>24</sub>ClNO<sub>2</sub>: C, 78.95; H, 4.82. Found: C, 78.74; H, 4.75.

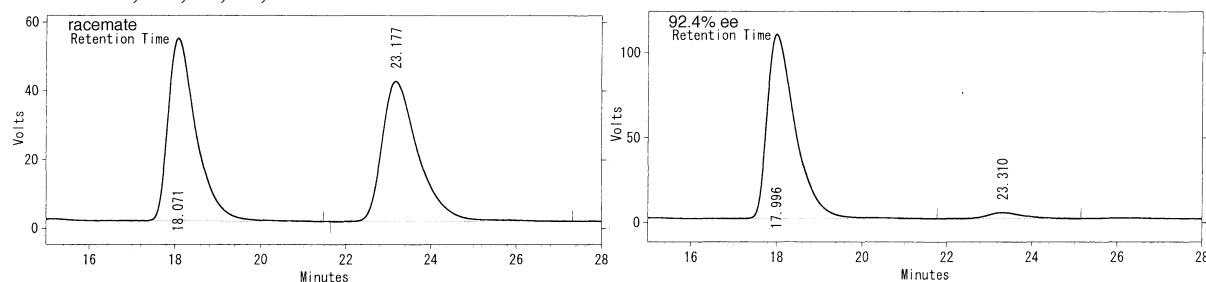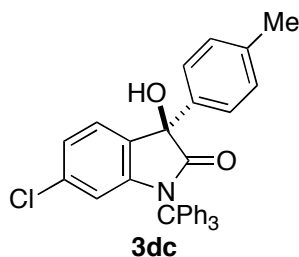

**Entry 9.** White solid. 87% yield. The ee was determined on a Daicel Chiralcel OD-H column with hexane/2-propanol = 95/5, flow = 0.5 mL/min. Retention times: 20.8 min [major enantiomer], 29.5 min [minor enantiomer]. 92% ee.  $[\alpha]_D^{20}$  -35.1 (*c* 0.50, CHCl<sub>3</sub>). The absolute configuration was assigned by analogy with entry 10.

<sup>1</sup>H NMR (CDCl<sub>3</sub>): δ 7.38-7.35 (m, 6H), 7.29-7.16 (m, 14H), 6.95 (dd, <sup>3</sup>J<sub>HH</sub> = 7.9 Hz and <sup>3</sup>J<sub>HH</sub> = 1.8 Hz, 1H), 6.29 (d, <sup>4</sup>J<sub>HH</sub> = 1.7 Hz, 1H), 3.10 (s, 1H), 2.36 (s, 3H). <sup>13</sup>C NMR (CDCl<sub>3</sub>): δ 179.4, 144.5, 141.5, 138.5, 137.2, 134.0, 130.4, 129.6, 129.2, 128.0, 127.3, 125.5, 125.4, 123.1, 116.6, 77.2, 74.8, 21.3. Anal. Calcd for C<sub>34</sub>H<sub>26</sub>ClNO<sub>2</sub>: C, 79.14; H, 5.08. Found: C, 79.14; H, 5.16.

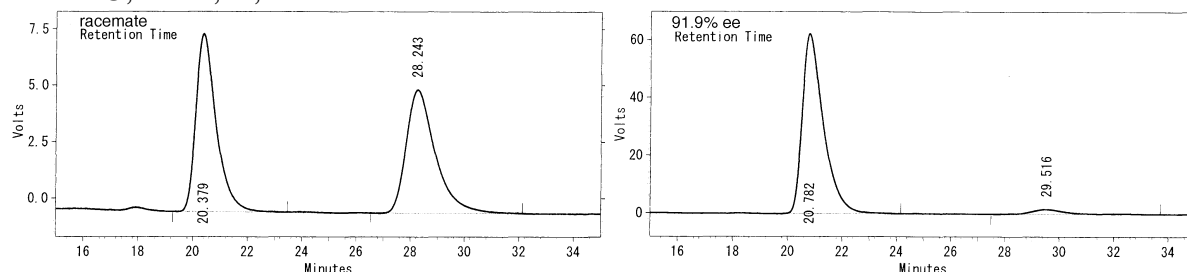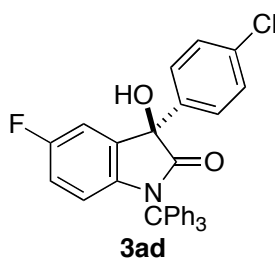

**Entry 10.** Pale yellow solid. 78% yield. The ee was determined on a Daicel Chiralcel OD-H column with hexane/2-propanol = 90/10, flow = 0.5 mL/min. Retention times: 20.3 min [major enantiomer], 25.4 min [minor enantiomer]. 86% ee.  $[\alpha]_D^{20}$  +12.2 (*c* 0.99, CHCl<sub>3</sub>). The absolute configuration was determined by X-ray crystallographic analysis after recrystallization from Et<sub>2</sub>O in the presence of DMF in a freezer (ee of the crystals: 99% ee).

<sup>1</sup>H NMR (CDCl<sub>3</sub>): δ 7.38-7.30 (m, 10H), 7.26-7.19 (m, 9H), 6.95 (dd, <sup>3</sup>J<sub>HF</sub> = 7.3 Hz and <sup>4</sup>J<sub>HH</sub> = 2.8 Hz, 1H), 6.66 (td, <sup>3</sup>J = 8.9 Hz and <sup>4</sup>J<sub>HH</sub> = 2.8 Hz, 1H), 6.31 (dd, <sup>3</sup>J<sub>HH</sub> = 9.0 Hz and

$^4J_{\text{HF}} = 4.1$  Hz, 1H), 3.23 (s, 1H).  $^{13}\text{C}$  NMR ( $\text{CDCl}_3$ ):  $\delta$  178.9, 159.1 (d,  $^1J_{\text{CF}} = 243$  Hz), 141.6, 139.0 (d,  $^4J_{\text{CF}} = 2.1$  Hz), 138.8, 134.6, 133.3 (d,  $^3J_{\text{CF}} = 7.2$  Hz), 129.2, 129.0, 128.0, 127.3, 127.0, 117.4 (d,  $^3J_{\text{CF}} = 7.2$  Hz), 115.1 (d,  $^2J_{\text{CF}} = 22.7$  Hz), 112.2 (d,  $^2J_{\text{CF}} = 23.8$  Hz), 77.4, 75.0. Anal. Calcd for  $\text{C}_{33}\text{H}_{23}\text{ClFNO}_2$ : C, 76.22; H, 4.46. Found: C, 76.23; H, 4.74.

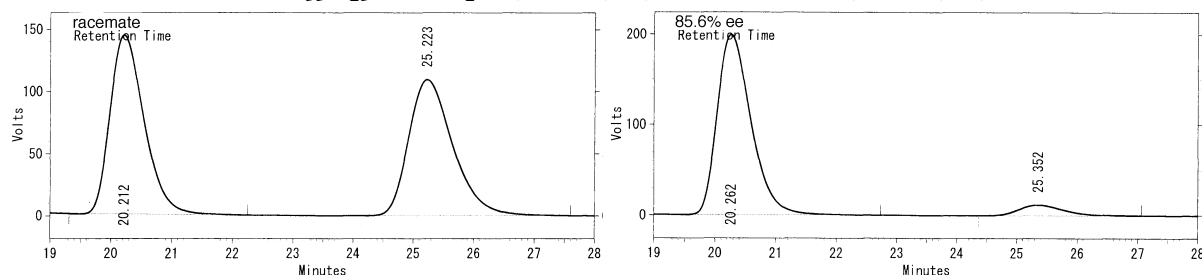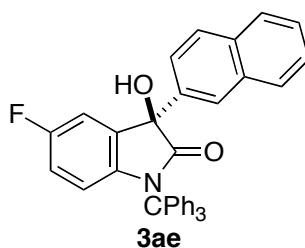

**Entry 11.** White solid. 85% yield. The ee was determined on a Daicel Chiralcel OD-H column with hexane/2-propanol = 100/1, flow = 1.0 mL/min. Retention times: 94.2 min [major enantiomer], 138.3 min [minor enantiomer]. 86% ee.  $[\alpha]_{\text{D}}^{20} +52.8$  (c 1.01,  $\text{CHCl}_3$ ). The absolute configuration was assigned by analogy with entry 10.

$^1\text{H}$  NMR ( $\text{CDCl}_3$ ):  $\delta$  7.91 (s, 1H), 7.87-7.83 (m, 3H), 7.53-7.50 (m, 2H), 7.46 (dd,  $^3J_{\text{HH}} = 8.7$  Hz and  $^4J_{\text{HH}} = 1.9$  Hz, 1H), 7.42 (d,  $^3J_{\text{HH}} = 7.0$  Hz, 6H), 7.27-7.19 (m, 9H), 7.02 (dd,  $^3J_{\text{HF}} = 7.3$  Hz and  $^4J_{\text{HH}} = 2.8$  Hz, 1H), 6.68 (td,  $^3J = 9.0$  Hz and  $^4J_{\text{HH}} = 2.8$  Hz, 1H), 6.34 (dd,  $^3J_{\text{HH}} = 9.0$  Hz and  $^4J_{\text{HF}} = 4.1$  Hz, 1H), 3.32 (s, 1H).  $^{13}\text{C}$  NMR ( $\text{CDCl}_3$ ):  $\delta$  179.2, 159.1 (d,  $^1J_{\text{CF}} = 242$  Hz), 141.7, 139.1 (d,  $^4J_{\text{HF}} = 3.1$  Hz), 137.5, 133.6 (d,  $^3J_{\text{CF}} = 7.2$  Hz), 133.24, 133.21, 129.2, 128.8, 128.5, 127.9, 127.7, 127.2, 126.6, 126.5, 124.7, 123.1, 117.2 (d,  $^3J_{\text{CF}} = 8.2$  Hz), 115.0 (d,  $^2J_{\text{CF}} = 22.6$  Hz), 112.4 (d,  $^2J_{\text{CF}} = 24.6$  Hz), 78.0, 74.9. Anal. Calcd for  $\text{C}_{37}\text{H}_{26}\text{FNO}_2$ : C, 82.97; H, 4.89. Found: C, 82.80; H, 5.05.

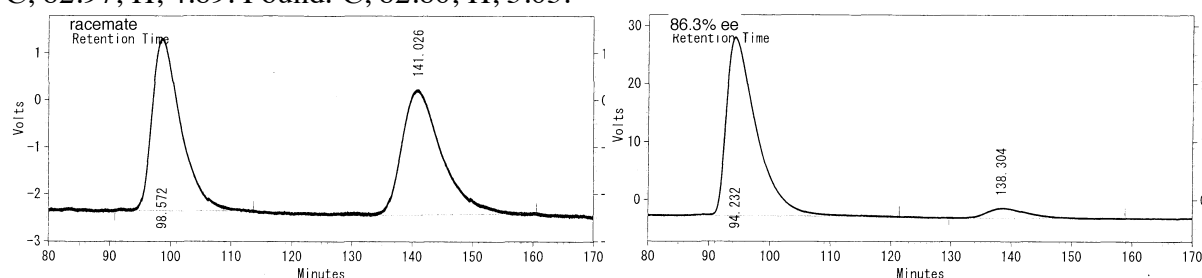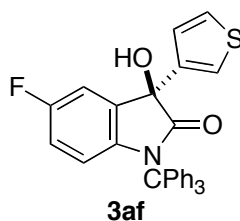

**Entry 12.** White solid. 94% yield. The ee was determined on a Daicel Chiralcel OD-H column with hexane/2-propanol = 90/10, flow = 0.5 mL/min. Retention times: 20.2 min [major enantiomer], 24.0 min [minor enantiomer]. 87% ee.  $[\alpha]_{\text{D}}^{20} -9.1$  (c 0.50,  $\text{CHCl}_3$ ). The

absolute configuration was assigned by analogy with entry 10.

$^1\text{H}$  NMR ( $\text{CDCl}_3$ ):  $\delta$  7.39-7.36 (m, 7H), 7.30 (dd,  $^4J_{\text{HH}} = 2.8$  and  $0.9$  Hz, 1H), 7.27-7.19 (m, 9H), 7.14 (dd,  $^3J_{\text{HH}} = 5.0$  Hz and  $^4J_{\text{HH}} = 0.8$  Hz, 1H), 7.11 (dd,  $^3J_{\text{HF}} = 7.4$  Hz and  $^4J_{\text{HH}} = 2.8$  Hz, 1H), 6.65 (td,  $^3J = 9.0$  Hz and  $^4J_{\text{HH}} = 2.9$  Hz, 1H), 6.27 (dd,  $^3J_{\text{HH}} = 8.9$  Hz and  $^4J_{\text{HF}} = 4.1$  Hz, 1H), 3.21 (s, 1H).  $^{13}\text{C}$  NMR ( $\text{CDCl}_3$ ):  $\delta$  178.8, 159.1 (d,  $^1J_{\text{CF}} = 242$  Hz), 141.6, 141.2, 138.8, 132.8 (d,  $^3J_{\text{CF}} = 7.2$  Hz), 129.3, 128.0, 127.3, 127.2, 125.5, 123.1, 117.2 (d,  $^3J_{\text{CF}} = 8.2$  Hz), 115.0 (d,  $^2J_{\text{CF}} = 22.6$  Hz), 112.0 (d,  $^2J_{\text{CF}} = 24.7$  Hz), 75.8, 74.7. Anal. Calcd for  $\text{C}_{31}\text{H}_{22}\text{FNO}_2\text{S}$ : C, 75.74; H, 4.51. Found: C, 75.50; H, 4.39.

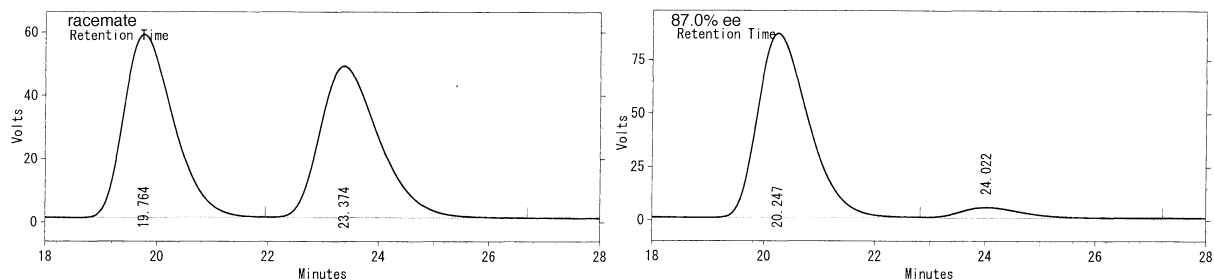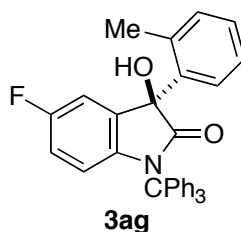

**Entry 13.** White solid. 74% yield. The ee was determined on a Daicel Chiralcel OD-H column with hexane/2-propanol = 95/5, flow = 0.5 mL/min. Retention times: 11.7 min [minor enantiomer], 14.9 min [major enantiomer]. 68% ee.  $[\alpha]_D^{20} +112$  (c 1.00,  $\text{CHCl}_3$ ). The absolute configuration was assigned by analogy with entry 10.

$^1\text{H}$  NMR ( $\text{CDCl}_3$ ):  $\delta$  7.81 (d,  $^3J_{\text{HH}} = 7.7$  Hz, 1H), 7.52 (d,  $^3J_{\text{HH}} = 7.9$  Hz, 6H), 7.27 (t,  $^3J_{\text{HH}} = 7.8$  Hz, 6H), 7.24-7.17 (m, 5H), 6.96 (d,  $^3J_{\text{HF}} = 7.4$  Hz, 1H), 6.70-6.64 (m, 2H), 6.25 (dd,  $^3J_{\text{HH}} = 8.7$  Hz and  $^4J_{\text{HF}} = 4.1$  Hz, 1H), 3.29 (s, 1H), 1.34 (s, 3H).  $^{13}\text{C}$  NMR ( $\text{CDCl}_3$ ):  $\delta$  177.4, 158.9 (d,  $^1J_{\text{CF}} = 244$  Hz), 141.7, 139.9 (d,  $^4J_{\text{CF}} = 2.1$  Hz), 137.2, 135.1, 132.8 (d,  $^3J_{\text{CF}} = 8.3$  Hz), 131.5, 129.2, 128.5, 127.9, 127.1, 126.2, 125.9, 116.6 (d,  $^3J_{\text{CF}} = 7.2$  Hz), 115.0 (d,  $^2J_{\text{CF}} = 23.8$  Hz), 112.5 (d,  $^2J_{\text{CF}} = 23.8$  Hz), 77.7, 74.5, 19.5. HRMS (ESI-TOF) calcd for  $\text{C}_{34}\text{H}_{36}\text{FNO}_2\text{Na}$  ( $\text{M}+\text{Na}^+$ ) 522.1840, found 522.1828.

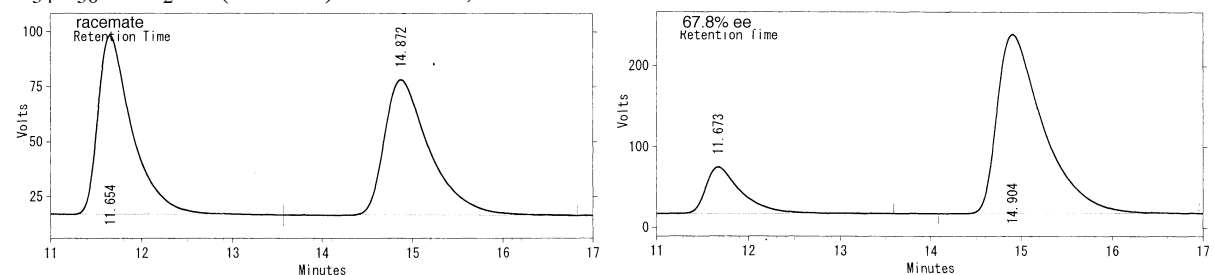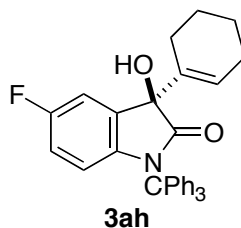

**Entry 14.** White solid. 72% yield. The ee was determined on a Daicel Chiralcel OD-H column with hexane/2-propanol = 95/5, flow = 0.7 mL/min. Retention times: 14.1 min [major enantiomer], 16.6 min [minor enantiomer]. 67% ee.  $[\alpha]_D^{20} +16.9$  (*c* 0.36, CHCl<sub>3</sub>). The absolute configuration was assigned by analogy with entry 10.

<sup>1</sup>H NMR (CDCl<sub>3</sub>): δ 7.40 (d, <sup>3</sup>*J*<sub>HH</sub> = 7.2 Hz, 6H), 7.26 (t, <sup>3</sup>*J*<sub>HH</sub> = 7.4 Hz, 6H), 7.21 (tt, <sup>3</sup>*J*<sub>HH</sub> = 7.1 Hz and <sup>4</sup>*J*<sub>HH</sub> = 1.3 Hz, 3H), 6.96 (dd, <sup>3</sup>*J*<sub>HF</sub> = 7.4 Hz and <sup>4</sup>*J*<sub>HH</sub> = 2.8 Hz, 1H), 6.60 (td, <sup>3</sup>*J* = 9.0 Hz and <sup>4</sup>*J*<sub>HH</sub> = 2.9 Hz, 1H), 6.22 (dd, <sup>3</sup>*J*<sub>HH</sub> = 8.9 Hz and <sup>4</sup>*J*<sub>HF</sub> = 4.2 Hz, 1H), 6.03-6.00 (m, 1H), 2.71 (s, 1H), 2.15-2.10 (m, 2H), 2.01-1.93 (m, 1H), 1.88-1.82 (m, 1H), 1.72-1.65 (m, 1H), 1.64-1.54 (m, 3H). <sup>13</sup>C NMR (CDCl<sub>3</sub>): δ 179.2, 159.0 (d, <sup>1</sup>*J*<sub>CF</sub> = 243 Hz), 141.8, 139.5, 136.3, 132.3 (d, <sup>3</sup>*J*<sub>CF</sub> = 7.2 Hz), 129.3, 127.9, 127.2, 124.3, 116.9 (d, <sup>3</sup>*J*<sub>CF</sub> = 8.3 Hz), 114.5 (d, <sup>2</sup>*J*<sub>CF</sub> = 23.8 Hz), 111.7 (d, <sup>2</sup>*J*<sub>CF</sub> = 23.8 Hz), 78.9, 74.7, 25.3, 23.7, 22.6, 22.1. Anal. Calcd for C<sub>31</sub>H<sub>22</sub>FNO<sub>2</sub>S: C, 75.74; H, 4.51. Found: C, 75.50; H, 4.39. HRMS (ESI-TOF) calcd for C<sub>33</sub>H<sub>28</sub>FNO<sub>2</sub>Na (M+Na<sup>+</sup>) 512.1996, found 512.1997.

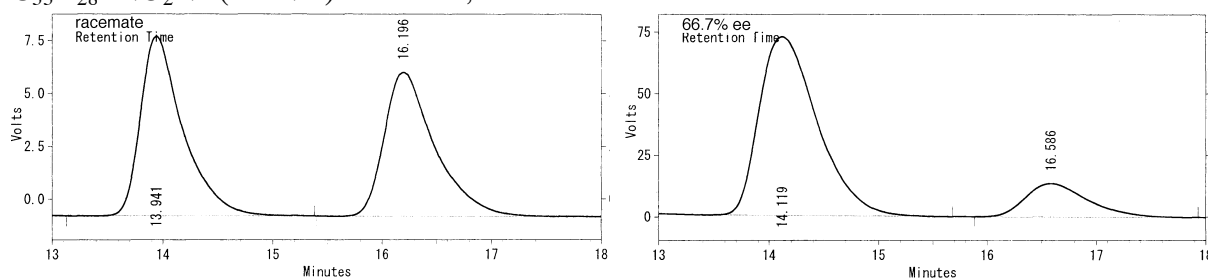

## Procedure for Equation 5.<sup>6</sup>

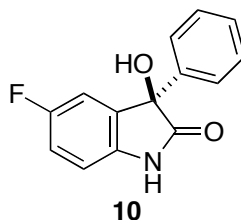

Triethylsilane (32.0 μL, 0.200 mmol) and trifluoroacetic acid (0.60 mL) were added to a solution of **3ab** (23.1 mg, 47.6 μmol; 91% ee) in CH<sub>2</sub>Cl<sub>2</sub> (2.0 mL), and the mixture was stirred for 2 h at room temperature. The reaction was quenched with saturated NaHCO<sub>3</sub> aq and extracted with CH<sub>2</sub>Cl<sub>2</sub>. The organic layer was dried over MgSO<sub>4</sub>, filtered, and concentrated under vacuum. The residue was purified by silica gel preparative TLC with EtOAc/hexane = 1/3 to afford compound **10** (CAS 1190310-35-0) as a white solid (10.9 mg, 44.8 μmol, 94% yield).

The ee was determined on two Daicel Chiralcel OD-H columns with hexane/2-propanol = 90/10, flow = 0.5 mL/min. Retention times: 51.1 min [minor enantiomer], 55.9 min [major enantiomer]. 91% ee.  $[\alpha]_D^{20} +4.5$  (*c* 0.50, MeOH).

<sup>1</sup>H NMR (DMSO-*d*<sub>6</sub>): δ 10.42 (s, 1H), 7.34-7.26 (m, 5H), 7.09 (ddd, <sup>3</sup>*J*<sub>HF</sub> = 9.5 Hz, <sup>3</sup>*J*<sub>HH</sub> = 8.7 Hz, and <sup>4</sup>*J*<sub>HH</sub> = 2.7 Hz, 1H), 6.96 (dd, <sup>3</sup>*J*<sub>HF</sub> = 8.0 Hz and <sup>4</sup>*J*<sub>HH</sub> = 2.6 Hz, 1H), 6.90 (dd, <sup>3</sup>*J*<sub>HH</sub> = 8.4 Hz and <sup>4</sup>*J*<sub>HF</sub> = 4.3 Hz, 1H), 6.75 (s, 1H). <sup>13</sup>C NMR (DMSO-*d*<sub>6</sub>): δ 178.4, 158.2 (d, <sup>1</sup>*J*<sub>CF</sub> = 238 Hz), 141.0, 138.1 (d, <sup>4</sup>*J*<sub>CF</sub> = 2.1 Hz), 135.4 (d, <sup>3</sup>*J*<sub>CF</sub> = 7.2 Hz), 128.2, 127.6, 125.4, 115.5 (d, <sup>2</sup>*J*<sub>CF</sub> = 23.8 Hz), 112.3 (d, <sup>2</sup>*J*<sub>CF</sub> = 24.8 Hz), 110.8 (d, <sup>3</sup>*J*<sub>CF</sub> = 8.3 Hz), 77.6.

<sup>6</sup> A. Volonterio and M. Zanda, *J. Org. Chem.* 2008, **73**, 7486.

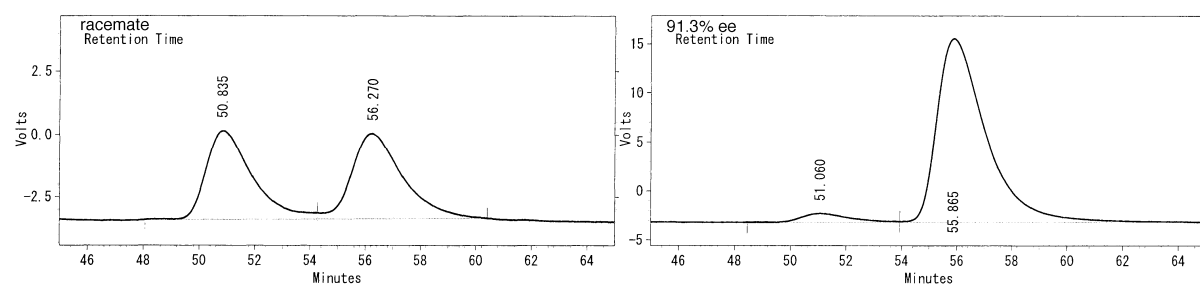



#### IV. X-ray Crystal Structure of Compound 5

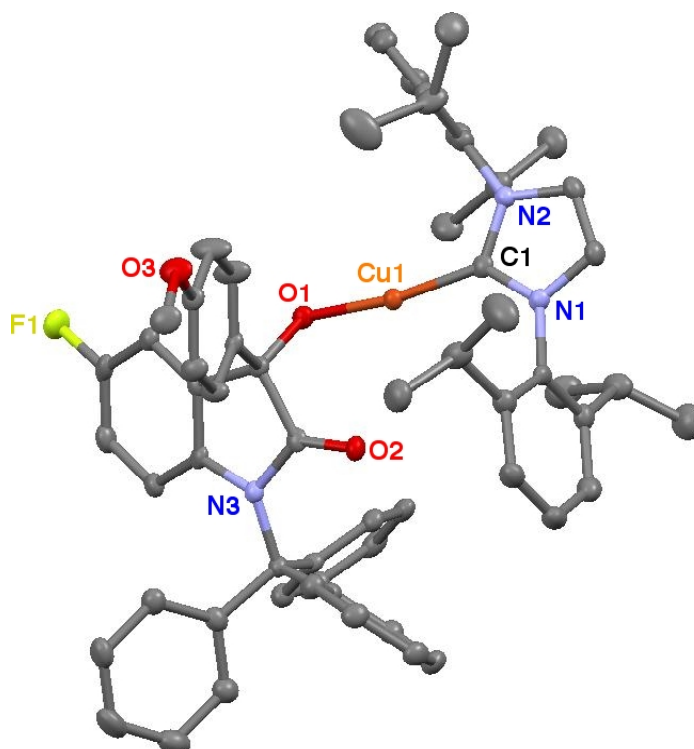

The crystal structure has been deposited at the Cambridge Crystallographic Data Centre (deposition number: CCDC 775074). The data can be obtained free of charge via the Internet at [www.ccdc.cam.ac.uk/conts/retrieving.html](http://www.ccdc.cam.ac.uk/conts/retrieving.html).

#### Crystal Data and Structure Refinement.

|                      |                                                                           |
|----------------------|---------------------------------------------------------------------------|
| Empirical Formula    | C <sub>66</sub> H <sub>73</sub> CuFN <sub>3</sub> O <sub>3</sub>          |
| Formula Weight       | 1038.81                                                                   |
| Temperature          | 90 ± 2 K                                                                  |
| Wavelength           | 0.71069 Å                                                                 |
| Crystal System       | Monoclinic                                                                |
| Space Group          | P2 <sub>1</sub> /c                                                        |
| Unit Cell Dimensions | a = 13.033(2) Å<br>b = 10.3280(18) Å<br>c = 42.357(7) Å<br>β = 90.232(3)° |
| Volume               | 5701.4(17) Å <sup>3</sup>                                                 |
| Z Value              | 4                                                                         |

|                                   |                                                 |
|-----------------------------------|-------------------------------------------------|
| Calculated Density                | 1.210 g/cm <sup>3</sup>                         |
| Absorption Coefficient            | 0.434 mm <sup>-1</sup>                          |
| F(000)                            | 2208                                            |
| Crystal Size                      | 0.50 x 0.20 x 0.10 mm                           |
| Theta Range for Data Collection   | 0.96–27.00°                                     |
| Index Ranges                      | –16 ≤ h ≤ 16, –11 ≤ k ≤ 13, –45 ≤ l ≤ 53        |
| Reflections Collected             | 32893                                           |
| Independent Reflections           | 12311 [R(int) = 0.0304]                         |
| Completeness to Theta = 27.00     | 98.9%                                           |
| Max. and Min. Transmission        | 0.9578 and 0.8121                               |
| Refinement Method                 | Full-matrix least-squares on F <sup>2</sup>     |
| Data / Restraints / Parameters    | 12311 / 0 / 667                                 |
| Goodness-of-Fit on F <sup>2</sup> | 1.166                                           |
| Final R Indices [I>2sigma(I)]     | R1 = 0.0669, wR2 = 0.1500                       |
| R Indices (All Data)              | R1 = 0.0771, wR2 = 0.1543                       |
| Largest Diff. Peak and Hole       | 1.192 and –0.856 e <sup>-</sup> /Å <sup>3</sup> |

## V. X-ray Crystal Structure of Compound 3ad

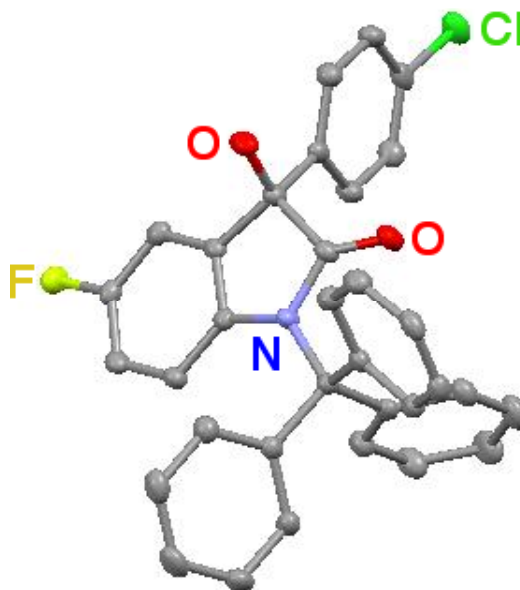

### Data Collection

A colorless Et<sub>2</sub>O solution of compound **4** containing a small amount of DMF was prepared. Crystals suitable for X-ray analysis were obtained by cooling the solution in a freezer (−20 °C).

A colorless prism crystal of C<sub>36</sub>H<sub>30</sub>O<sub>3</sub>N<sub>2</sub>ClF having approximate dimensions of 0.40 x 0.30 x 0.30 mm was mounted on a glass fiber. All measurements were made on a Rigaku RAXIS RAPID imaging plate area detector with graphite monochromated Mo-Kα radiation.

Indexing was performed from 3 oscillations that were exposed for 30 seconds. The crystal-to-detector distance was 127.40 mm.

Cell constants and an orientation matrix for data collection corresponded to a primitive tetragonal cell (laue class: 4/m) with dimensions:

$$\begin{aligned}a &= 9.339(2) \text{ \AA} \\c &= 34.336(6) \text{ \AA} \\V &= 2994.8(10) \text{ \AA}^3\end{aligned}$$

For  $Z = 4$  and F.W. = 593.10, the calculated density is 1.315 g/cm<sup>3</sup>. Based on the systematic absences of:

$$00l: l \neq 4n$$

and the successful solution and refinement of the structure, the space group was determined to be:

$$P4_3 (\#78)$$

The data were collected at a temperature of  $-150 \pm 1$  °C to a maximum  $2\theta$  value of 55.0°. A total of 44 oscillation images were collected. A sweep of data was done using  $\omega$  scans from 130.0 to 190.0° in 5.0° step, at  $\chi = 45.0^\circ$  and  $\phi = 30.0^\circ$ . The exposure rate was 80.0 [sec./°]. A second sweep was performed using  $\omega$  scans from 0.0 to 160.0° in 5.0° step, at  $\chi = 45.0^\circ$

and  $\phi = 180.0^\circ$ . The exposure rate was 80.0 [sec./°]. The crystal-to-detector distance was 127.40 mm. Readout was performed in the 0.100 mm pixel mode.

### Data Reduction

Of the 29293 reflections that were collected, 6852 were unique ( $R_{\text{int}} = 0.050$ ).

The linear absorption coefficient,  $\mu$ , for Mo-K $\alpha$  radiation is 1.733 cm<sup>-1</sup>. The data were corrected for Lorentz and polarization effects.

### Structure Solution and Refinement

The structure was solved by direct methods<sup>7</sup> and expanded using Fourier techniques.<sup>8</sup> The non-hydrogen atoms were refined anisotropically. Hydrogen atoms were refined using the riding model. The final cycle of full-matrix least-squares refinement<sup>9</sup> on F was based on 24476 observed reflections ( $I > 2.00\sigma(I)$ ) and 419 variable parameters and converged (largest parameter shift was 0.00 times its esd) with unweighted and weighted agreement factors of:

$$R = \sum ||F_o| - |F_c|| / \sum |F_o| = 0.0477$$

$$R_w = [\sum w (|F_o| - |F_c|)^2 / \sum w F_o^2]^{1/2} = 0.0580$$

The standard deviation of an observation of unit weight<sup>10</sup> was 1.00. A Chebychev polynomial weighting scheme was used.<sup>11</sup> Plots of  $\sum w (|F_o| - |F_c|)^2$  versus  $|F_o|$ , reflection order in data collection,  $\sin \theta/\lambda$  and various classes of indices showed no unusual trends. The maximum and minimum peaks on the final difference Fourier map corresponded to 1.80 and -1.66 e<sup>-</sup>/Å<sup>3</sup>, respectively. The absolute structure was deduced based on Flack parameter, -0.03(3), refined using 3368 Friedel pairs.<sup>12</sup>

Neutral atom scattering factors were taken from Cromer and Waber.<sup>13</sup> Anomalous dispersion effects were included in Fcalc;<sup>14</sup> the values for  $\Delta f'$  and  $\Delta f''$  were those of Creagh and McAuley.<sup>15</sup> The values for the mass attenuation coefficients are those of Creagh and

<sup>7</sup> SIR92: A. Altomare, G. Cascarano, C. Giacovazzo, A. Guagliardi, M. Burla, G. Polidori and M. Camalli, *J. Appl. Cryst.* 1994, **27**, 435.

<sup>8</sup> DIRDIF99: P. T. Beurskens, G. Admiraal, G. Beurskens, W. P. Bosman, R. de Gelder, R. Israel and J. M. M. Smits, The DIRDIF-99 program system, Technical Report of the Crystallography Laboratory, University of Nijmegen, The Netherlands (1999).

<sup>9</sup> Least Squares function minimized:

$$\sum w (|F_o| - |F_c|)^2 \quad \text{where } w = \text{Least Squares weights.}$$

<sup>10</sup> Standard deviation of an observation of unit weight:

$$[\sum w (|F_o| - |F_c|)^2 / (N_o - N_v)]^{1/2}$$

where:  $N_o$  = number of observations,  $N_v$  = number of variables

<sup>11</sup> J. R. Carruthers and D. J. Watkin, *Acta Crystallogr.* 1979, **A35**, 698.

<sup>12</sup> H. D. Flack, *Acta Crystallogr.* 1983, **A39**, 876.

<sup>13</sup> D. T. Cromer and J. T. Waber, "International Tables for X-ray Crystallography", Vol. IV, The Kynoch Press, Birmingham, England, Table 2.2 A (1974).

<sup>14</sup> J. A. Ibers and W. C. Hamilton, *Acta Crystallogr.* 1964, **17**, 781.

<sup>15</sup> D. C. Creagh and W. J. McAuley, "International Tables for Crystallography", Vol C, (A. J. C. Wilson, ed.), Kluwer Academic Publishers, Boston, Table 4.2.6.8, pages 219–222 (1992).

Hubbell.<sup>16</sup> All calculations were performed using the CrystalStructure<sup>17,18</sup> crystallographic software package.

The crystal structure has been deposited at the Cambridge Crystallographic Data Centre (deposition number: CCDC 775043). The data can be obtained free of charge via the Internet at [www.ccdc.cam.ac.uk/conts/retrieving.html](http://www.ccdc.cam.ac.uk/conts/retrieving.html).

---

<sup>16</sup> D. C. Creagh and J. H. Hubbell, "International Tables for Crystallography", Vol C, (A. J. C. Wilson, ed.), Kluwer Academic Publishers, Boston, Table 4.2.4.3, pages 200–206 (1992).

<sup>17</sup> CrystalStructure 3.8: Crystal Structure Analysis Package, Rigaku and Rigaku Americas (2000–2007). 9009 New Trails Dr. The Woodlands TX 77381 USA.

<sup>18</sup> CRYSTALS Issue 11: J. R. Carruthers, J. S. Rollett, P. W. Betteridge, D. Kinna, L. Pearce, A. Larsen and E. Gabe, Chemical Crystallography Laboratory, Oxford, UK (1999).

## Experimental Details

### A. Crystal Data

|                         |                                                                                             |
|-------------------------|---------------------------------------------------------------------------------------------|
| Empirical Formula       | $\text{C}_{36}\text{H}_{30}\text{O}_3\text{N}_2\text{ClF}$                                  |
| Formula Weight          | 593.10                                                                                      |
| Crystal Color, Habit    | colorless, prism                                                                            |
| Crystal Dimensions      | 0.40 X 0.30 X 0.30 mm                                                                       |
| Crystal System          | tetragonal                                                                                  |
| Lattice Type            | Primitive                                                                                   |
| Indexing Images         | 3 oscillations @ 30.0 seconds                                                               |
| Detector Position       | 127.40 mm                                                                                   |
| Pixel Size              | 0.100 mm                                                                                    |
| Lattice Parameters      | $a = 9.339(2) \text{ \AA}$<br>$c = 34.336(6) \text{ \AA}$<br>$V = 2994.8(10) \text{ \AA}^3$ |
| Space Group             | $P4_3$ (#78)                                                                                |
| Z value                 | 4                                                                                           |
| $D_{\text{calc}}$       | $1.315 \text{ g/cm}^3$                                                                      |
| F000                    | 1240.00                                                                                     |
| $\mu(\text{MoK}\alpha)$ | $1.733 \text{ cm}^{-1}$                                                                     |

## B. Intensity Measurements

|                                                           |                                                                                  |
|-----------------------------------------------------------|----------------------------------------------------------------------------------|
| Diffractometer                                            | Rigaku RAXIS-RAPID                                                               |
| Radiation                                                 | MoK $\alpha$ ( $\lambda = 0.71075 \text{ \AA}$ )<br>graphite monochromated       |
| Detector Aperture                                         | 280 mm x 256 mm                                                                  |
| Data Images                                               | 44 exposures                                                                     |
| $\omega$ oscillation Range ( $\chi=45.0$ , $\phi=30.0$ )  | 130.0 - 190.0°                                                                   |
| Exposure Rate                                             | 80.0 sec./°                                                                      |
| $\omega$ oscillation Range ( $\chi=45.0$ , $\phi=180.0$ ) | 0.0 - 160.0°                                                                     |
| Exposure Rate                                             | 80.0 sec./°                                                                      |
| Detector Position                                         | 127.40 mm                                                                        |
| Pixel Size                                                | 0.100 mm                                                                         |
| $2\theta_{\text{max}}$                                    | 55.0°                                                                            |
| No. of Reflections Measured                               | Total: 29293<br>Unique: 6852 ( $R_{\text{int}} = 0.050$ )<br>Friedel pairs: 3368 |
| Corrections                                               | Lorentz-polarization                                                             |

## C. Structure Solution and Refinement

|                                          |                                                                    |
|------------------------------------------|--------------------------------------------------------------------|
| Structure Solution                       | Direct Methods (SIR92)                                             |
| Refinement                               | Full-matrix least-squares on F                                     |
| Function Minimized                       | $\Sigma w ( F_o  -  F_c )^2$                                       |
| Least Squares Weights                    | Chebyshev polynomial with 3 parameters<br>26.3839, 24.6720, 7.9365 |
| $2\theta_{\text{max}}$ cutoff            | 55.0°                                                              |
| Anomalous Dispersion                     | All non-hydrogen atoms                                             |
| No. Observations ( $I > 2.00\sigma(I)$ ) | 24476                                                              |
| No. Variables                            | 419                                                                |
| Reflection/Parameter Ratio               | 58.42                                                              |
| Residuals: R ( $I > 2.00\sigma(I)$ )     | 0.0477                                                             |
| Residuals: $R_w$ ( $I > 2.00\sigma(I)$ ) | 0.0580                                                             |
| Goodness of Fit Indicator                | 1.004                                                              |
| Flack parameter                          | −0.03(3)                                                           |
| Max Shift/Error in Final Cycle           | 0.000                                                              |
| Maximum peak in Final Diff. Map          | 1.80 e <sup>−</sup> /Å <sup>3</sup>                                |
| Minimum peak in Final Diff. Map          | −1.66 e <sup>−</sup> /Å <sup>3</sup>                               |



## VI. $^1\text{H}$ and $^{13}\text{C}$ NMR Spectra

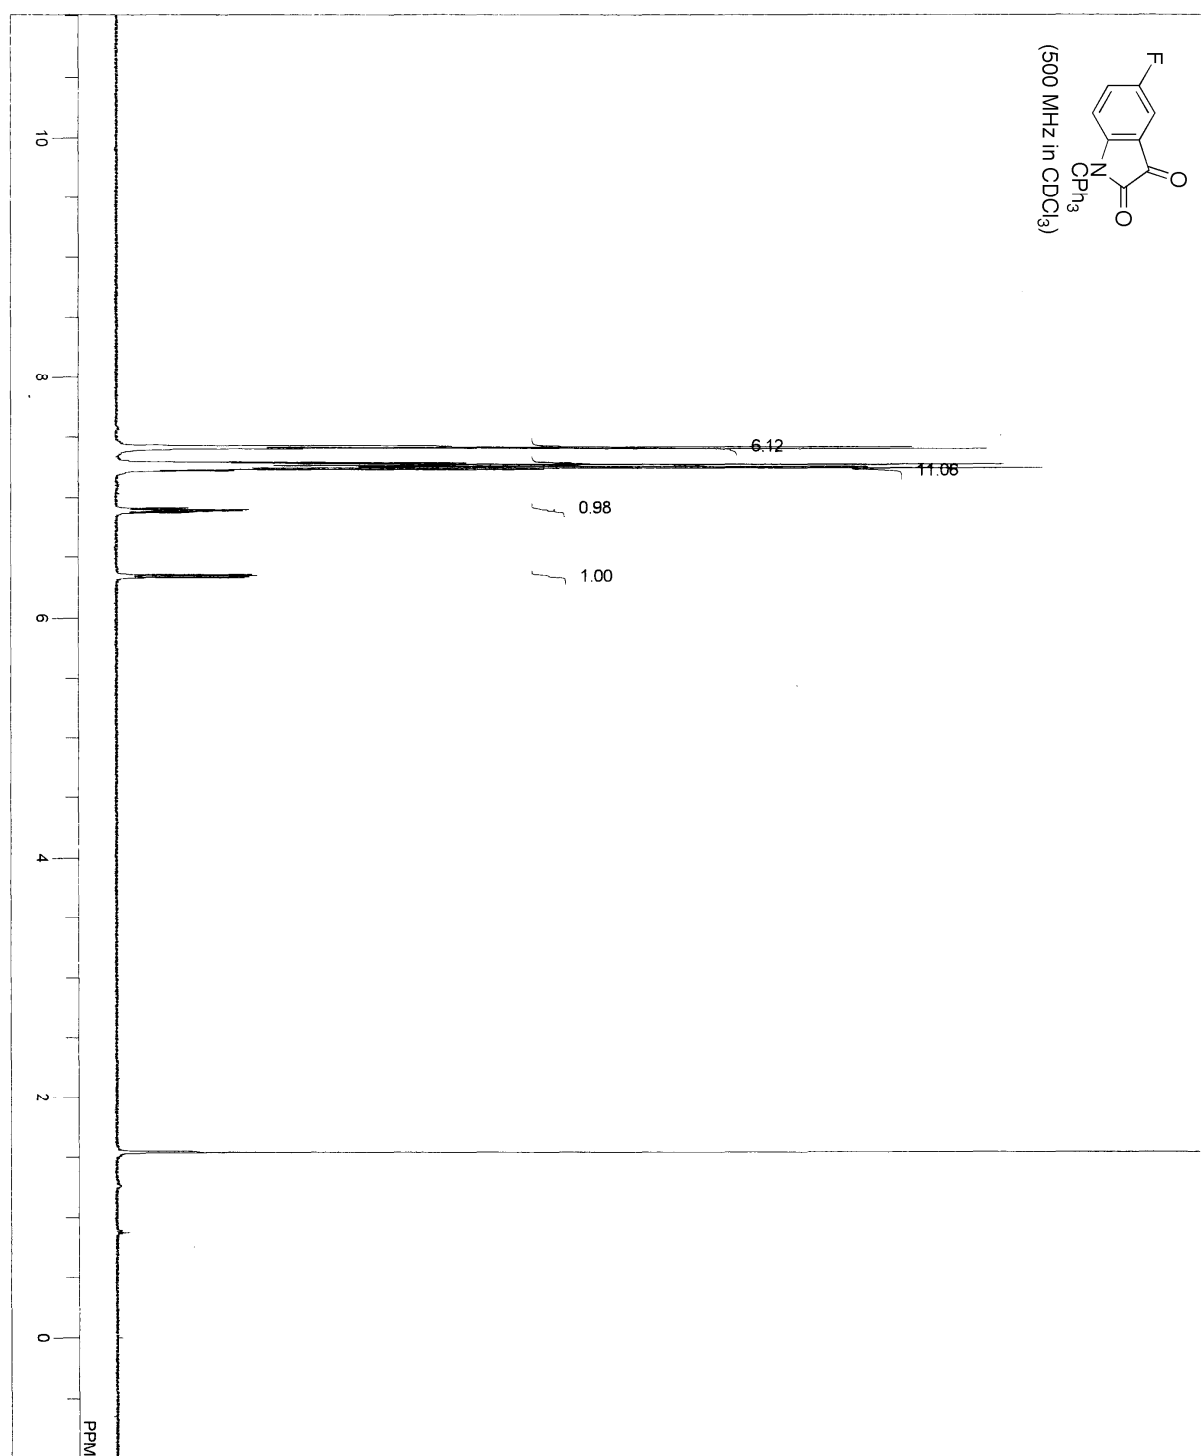

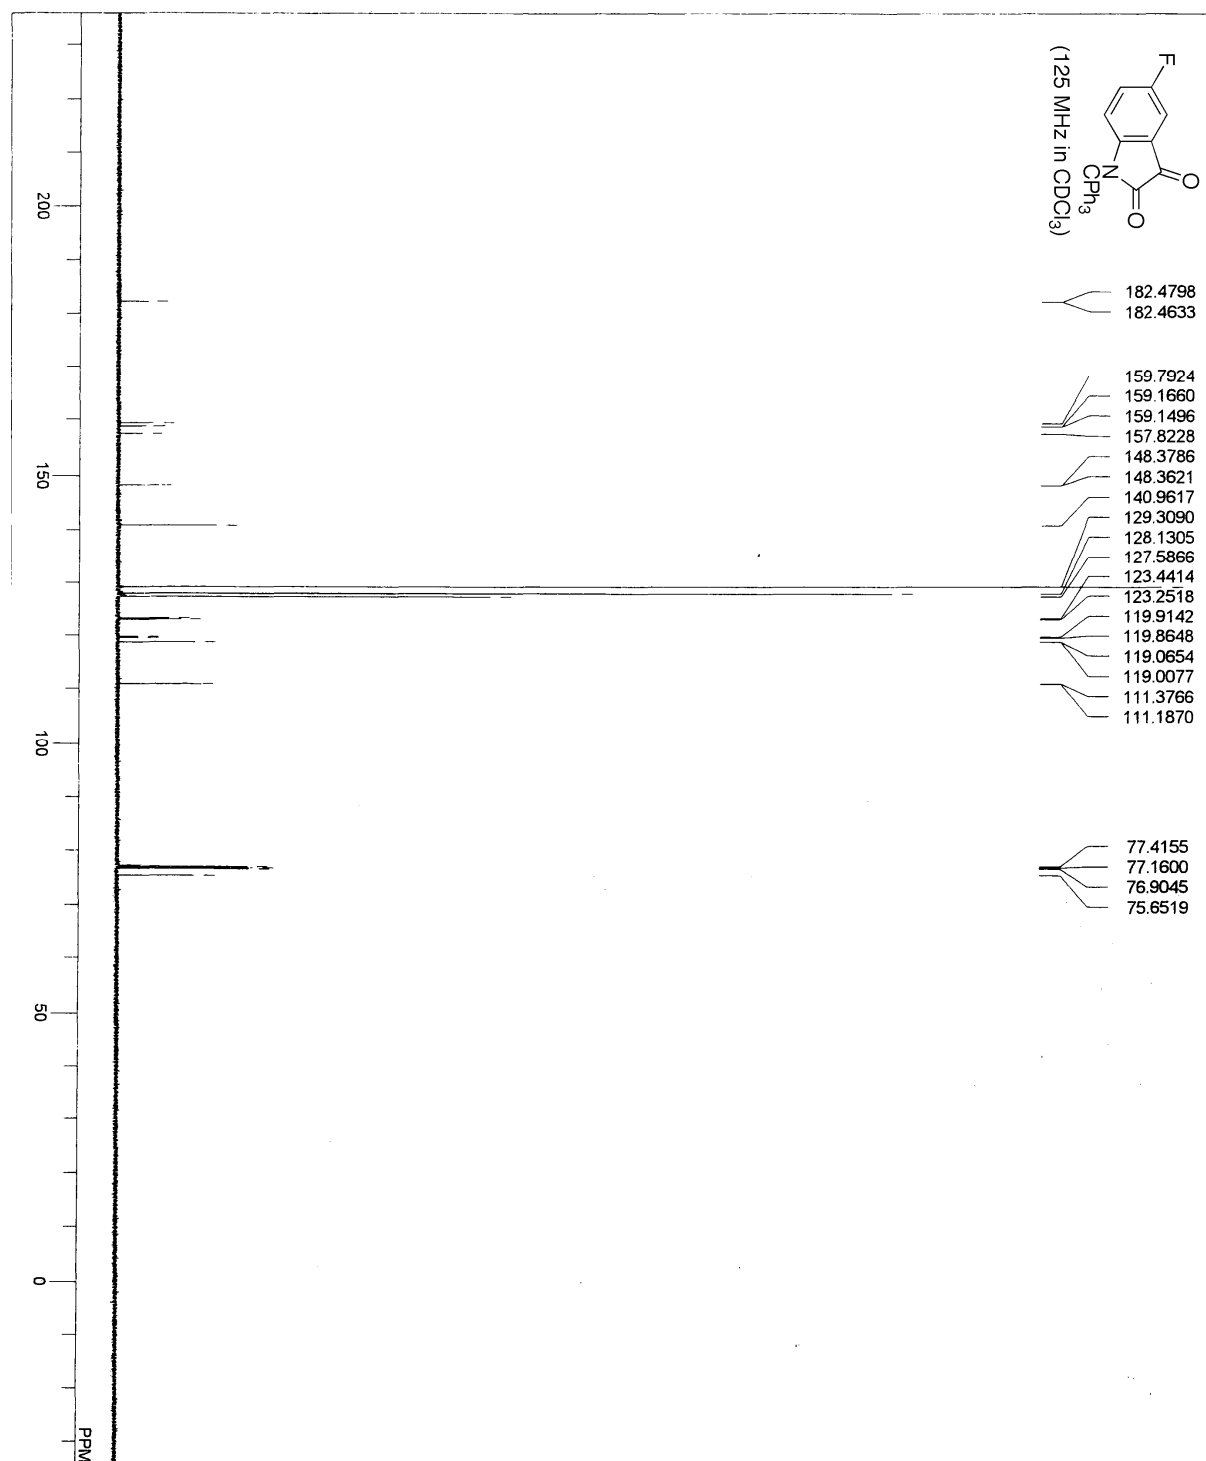

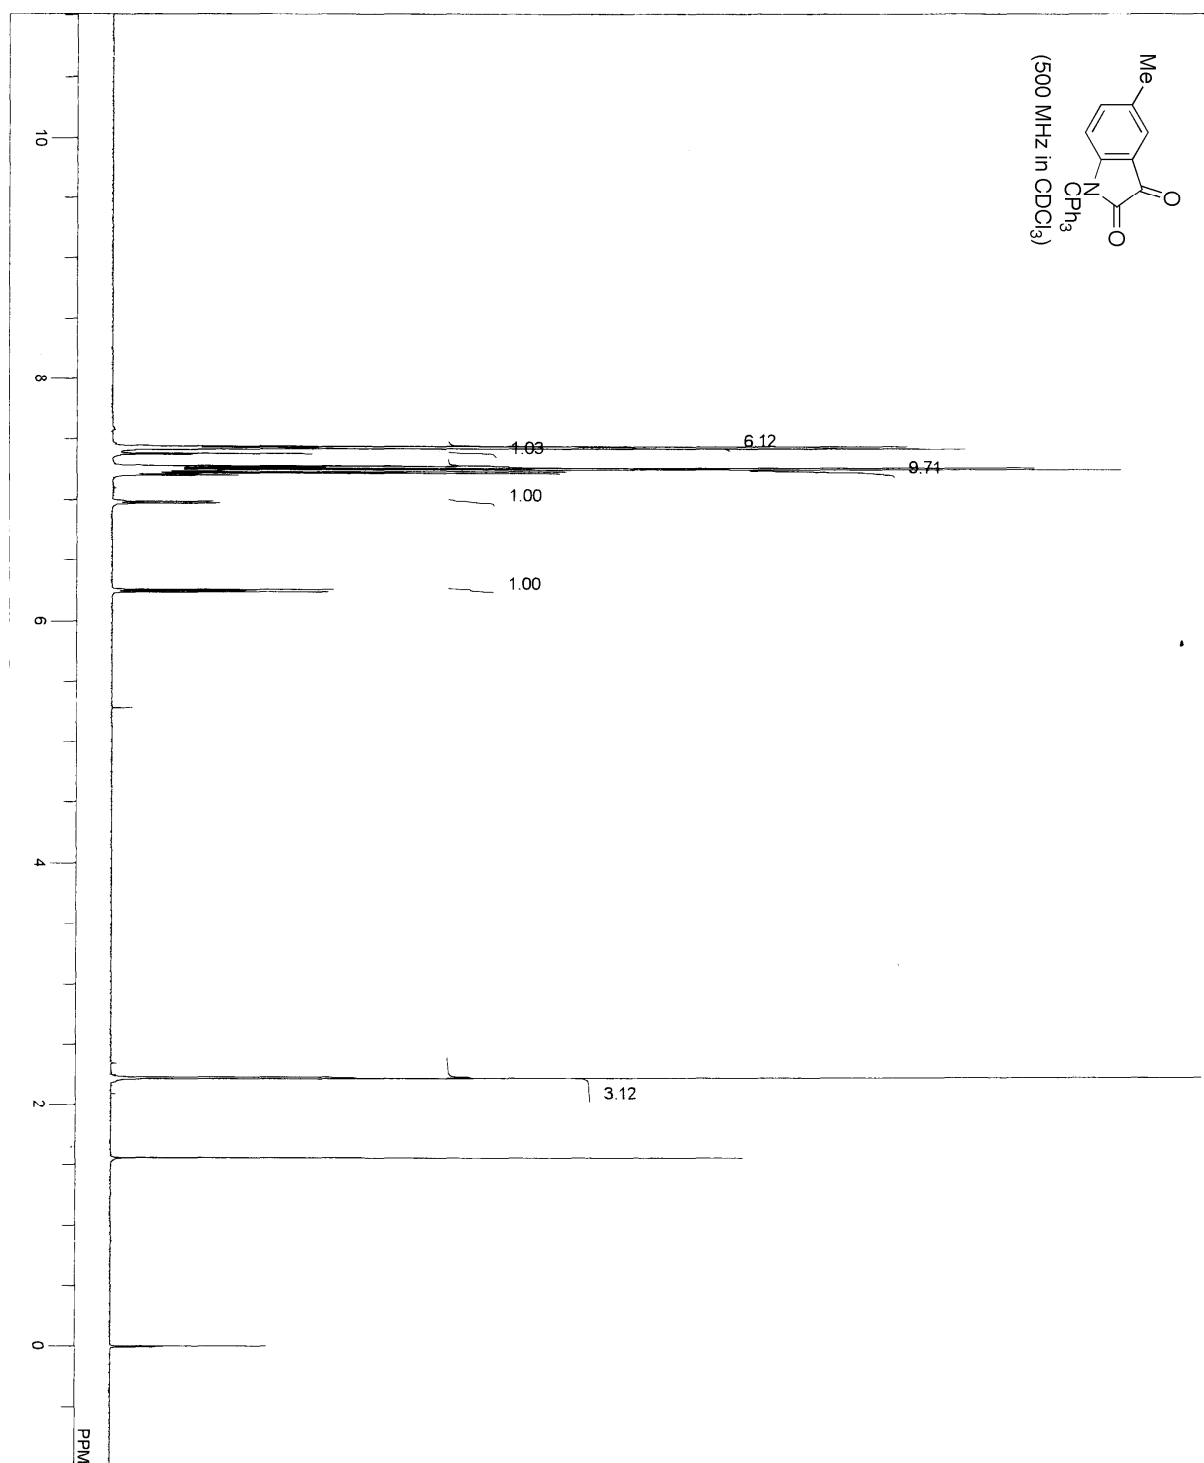

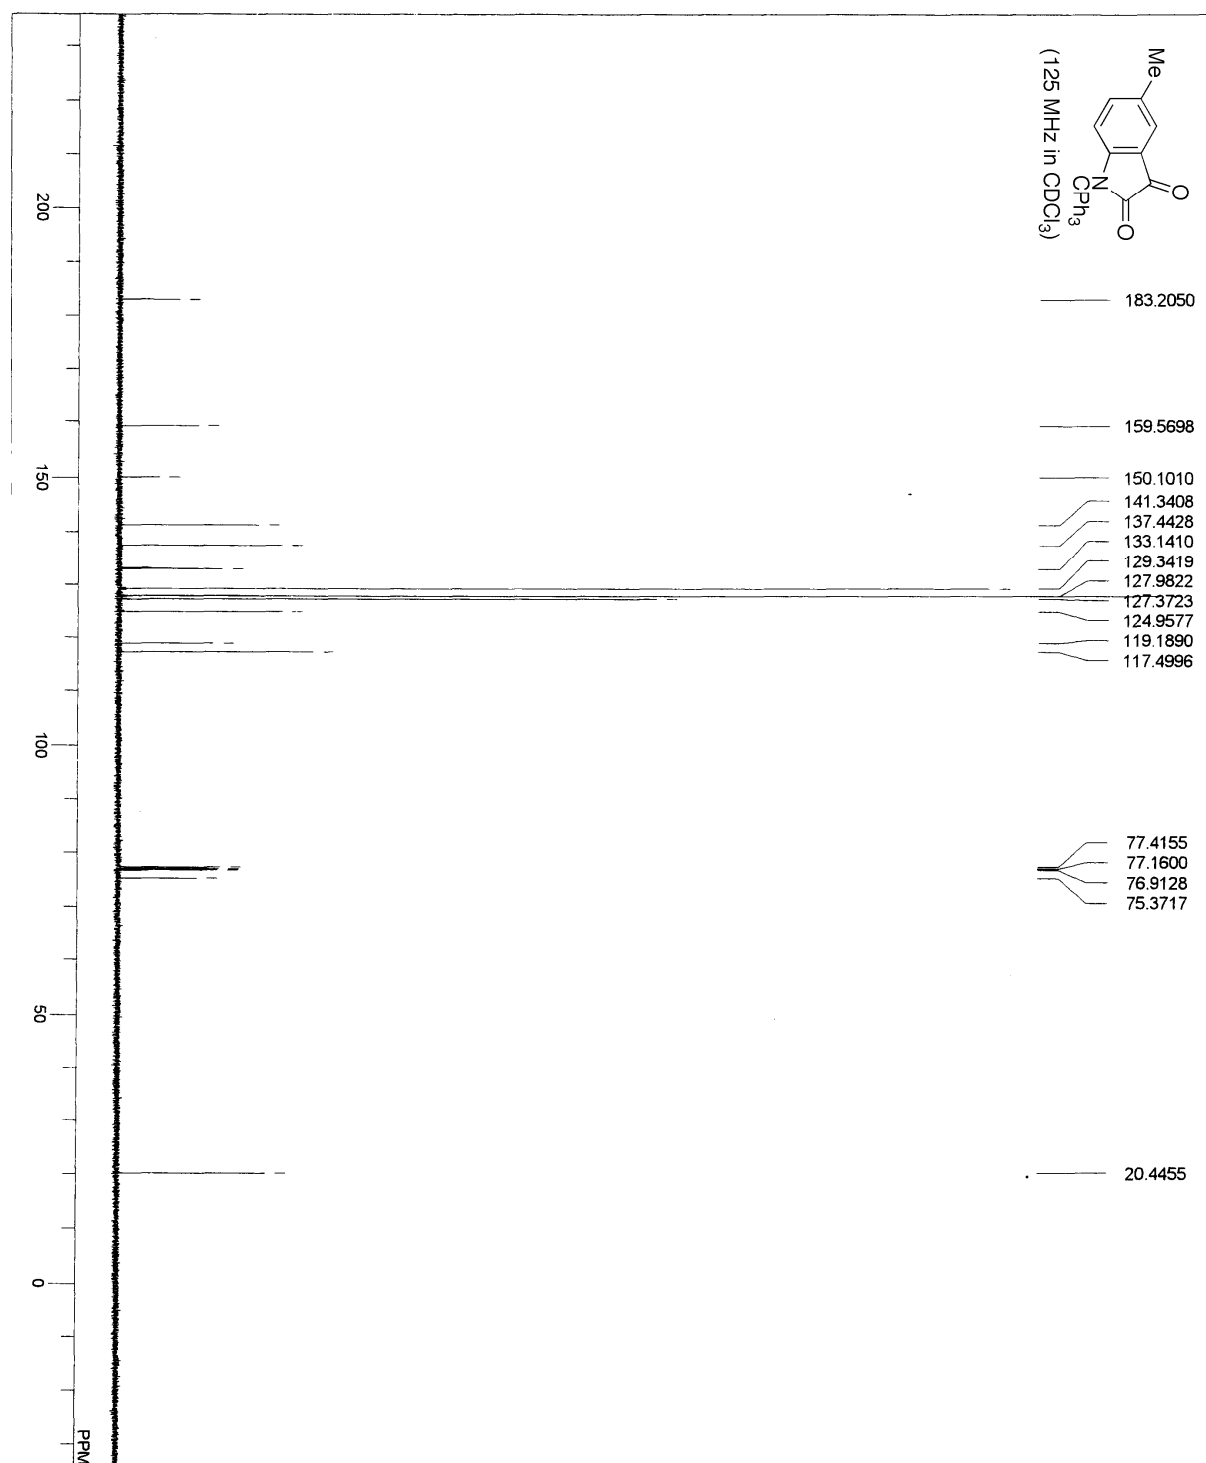

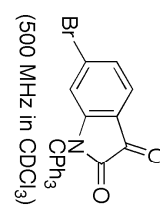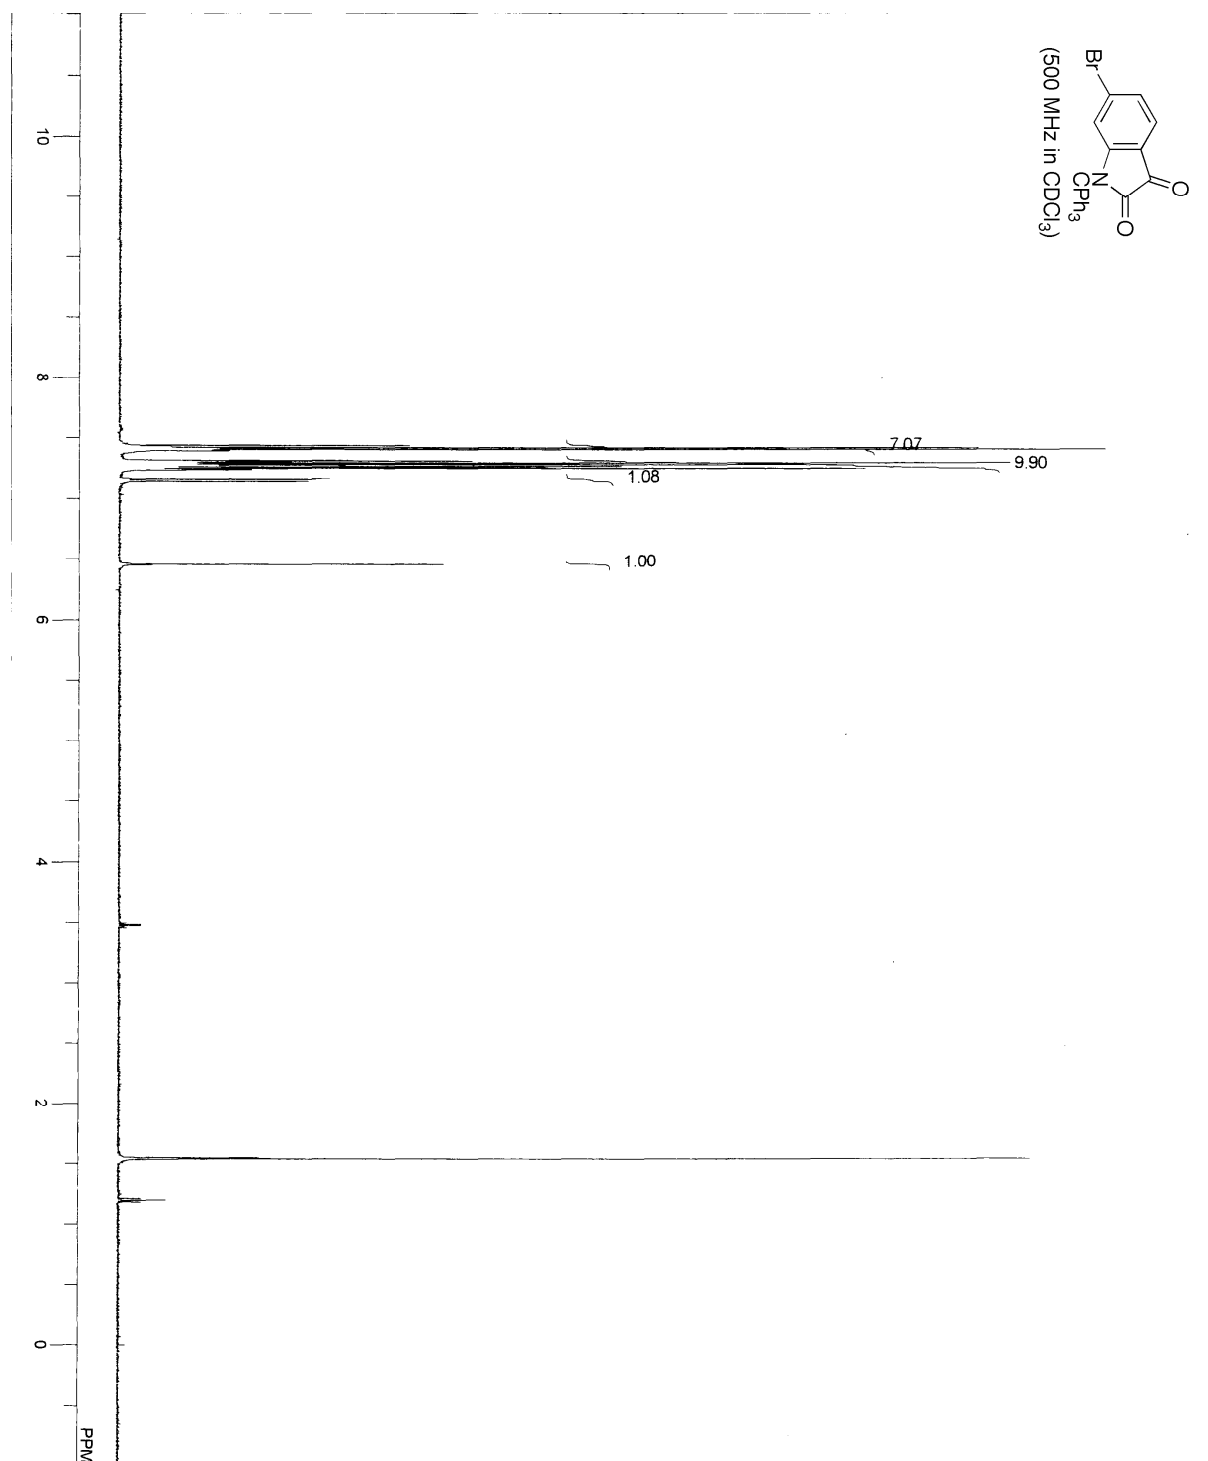

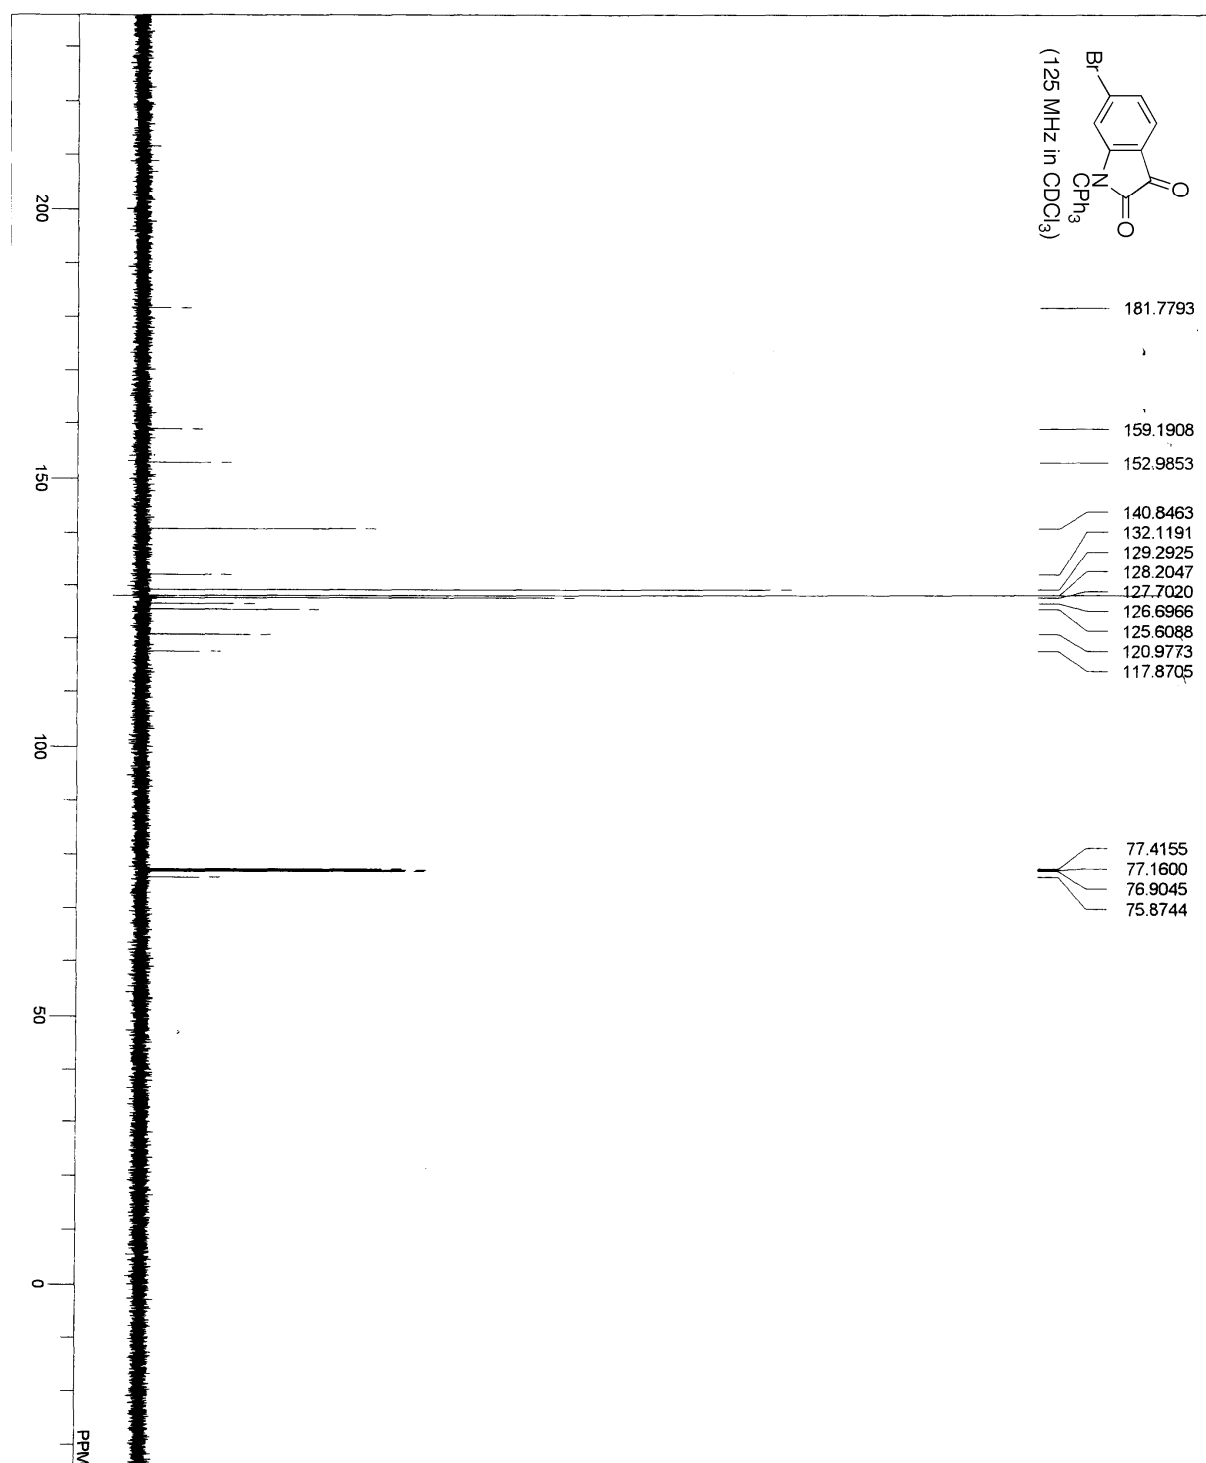

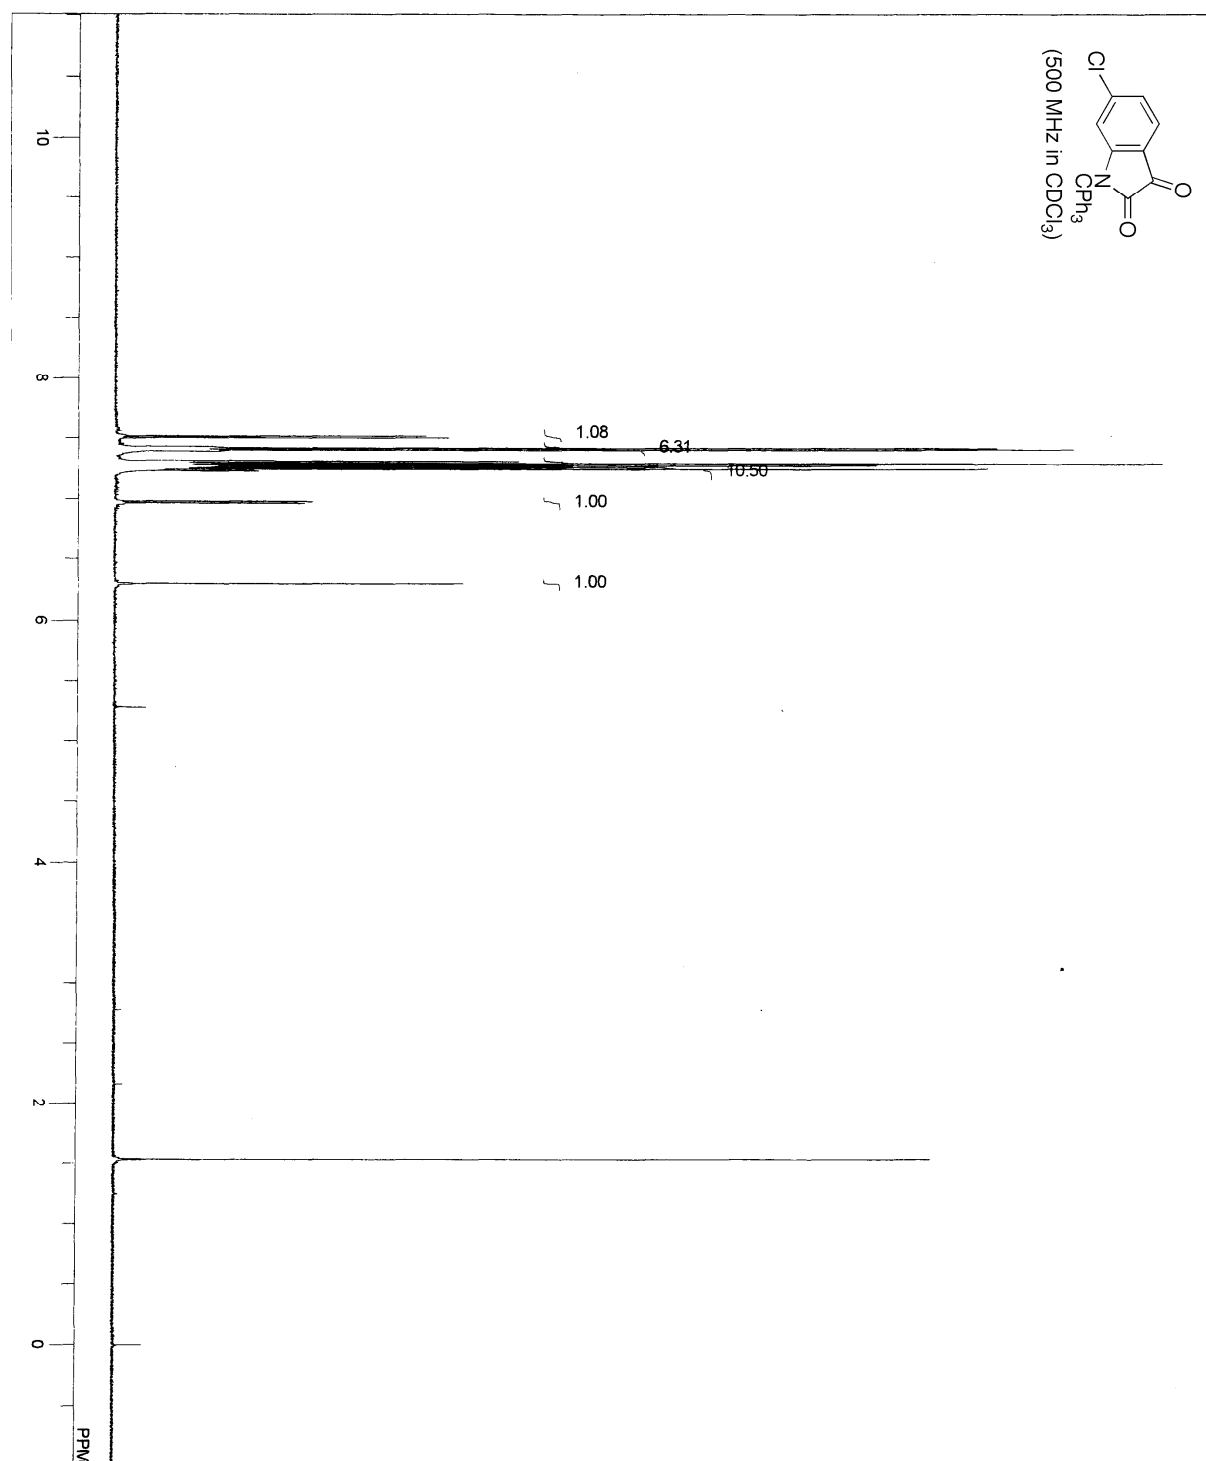

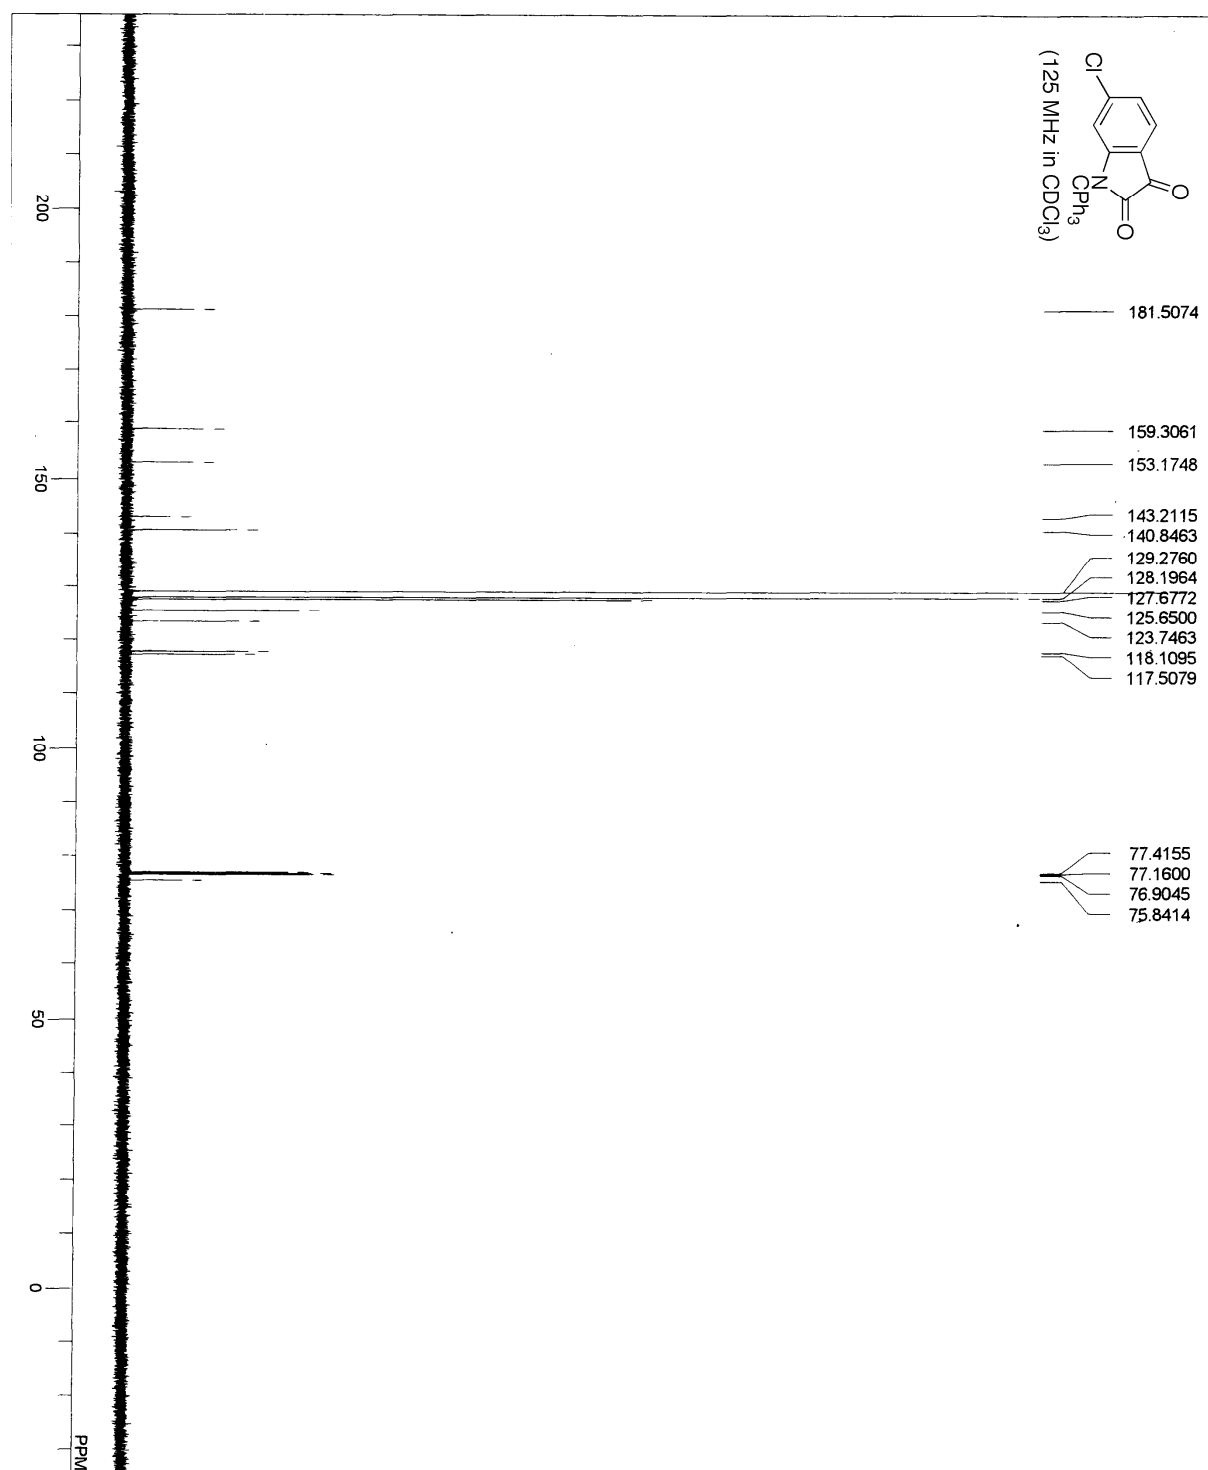



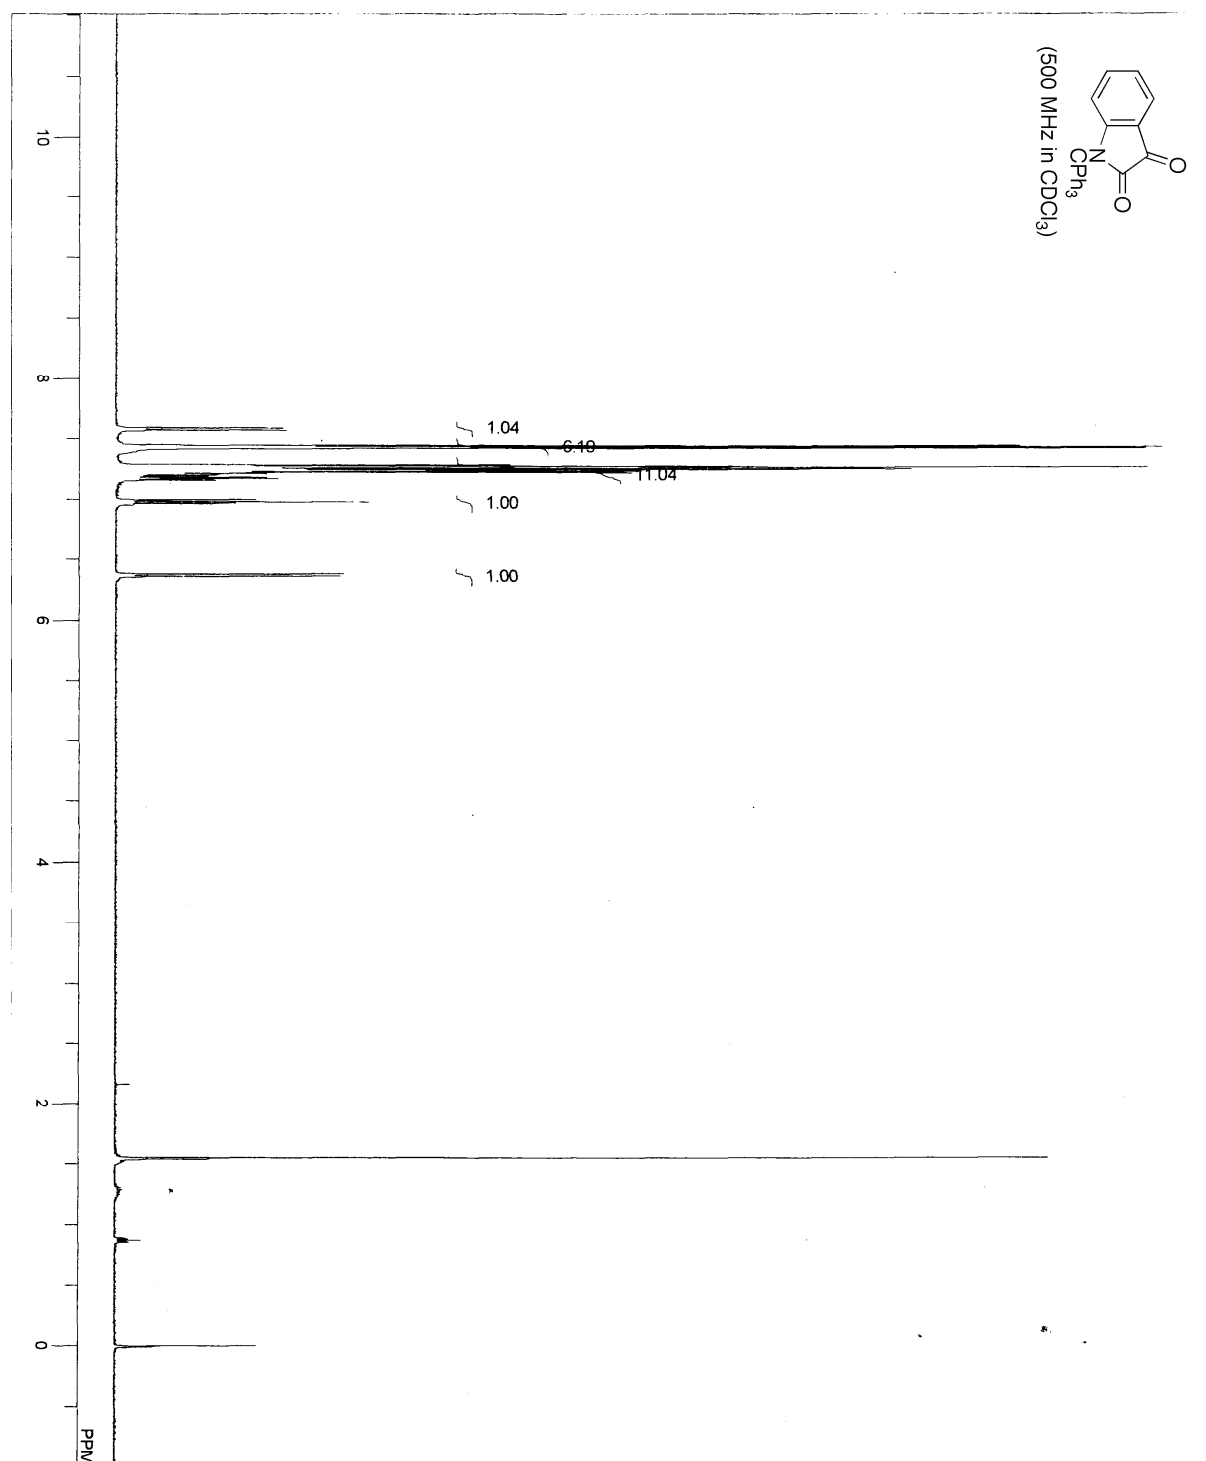

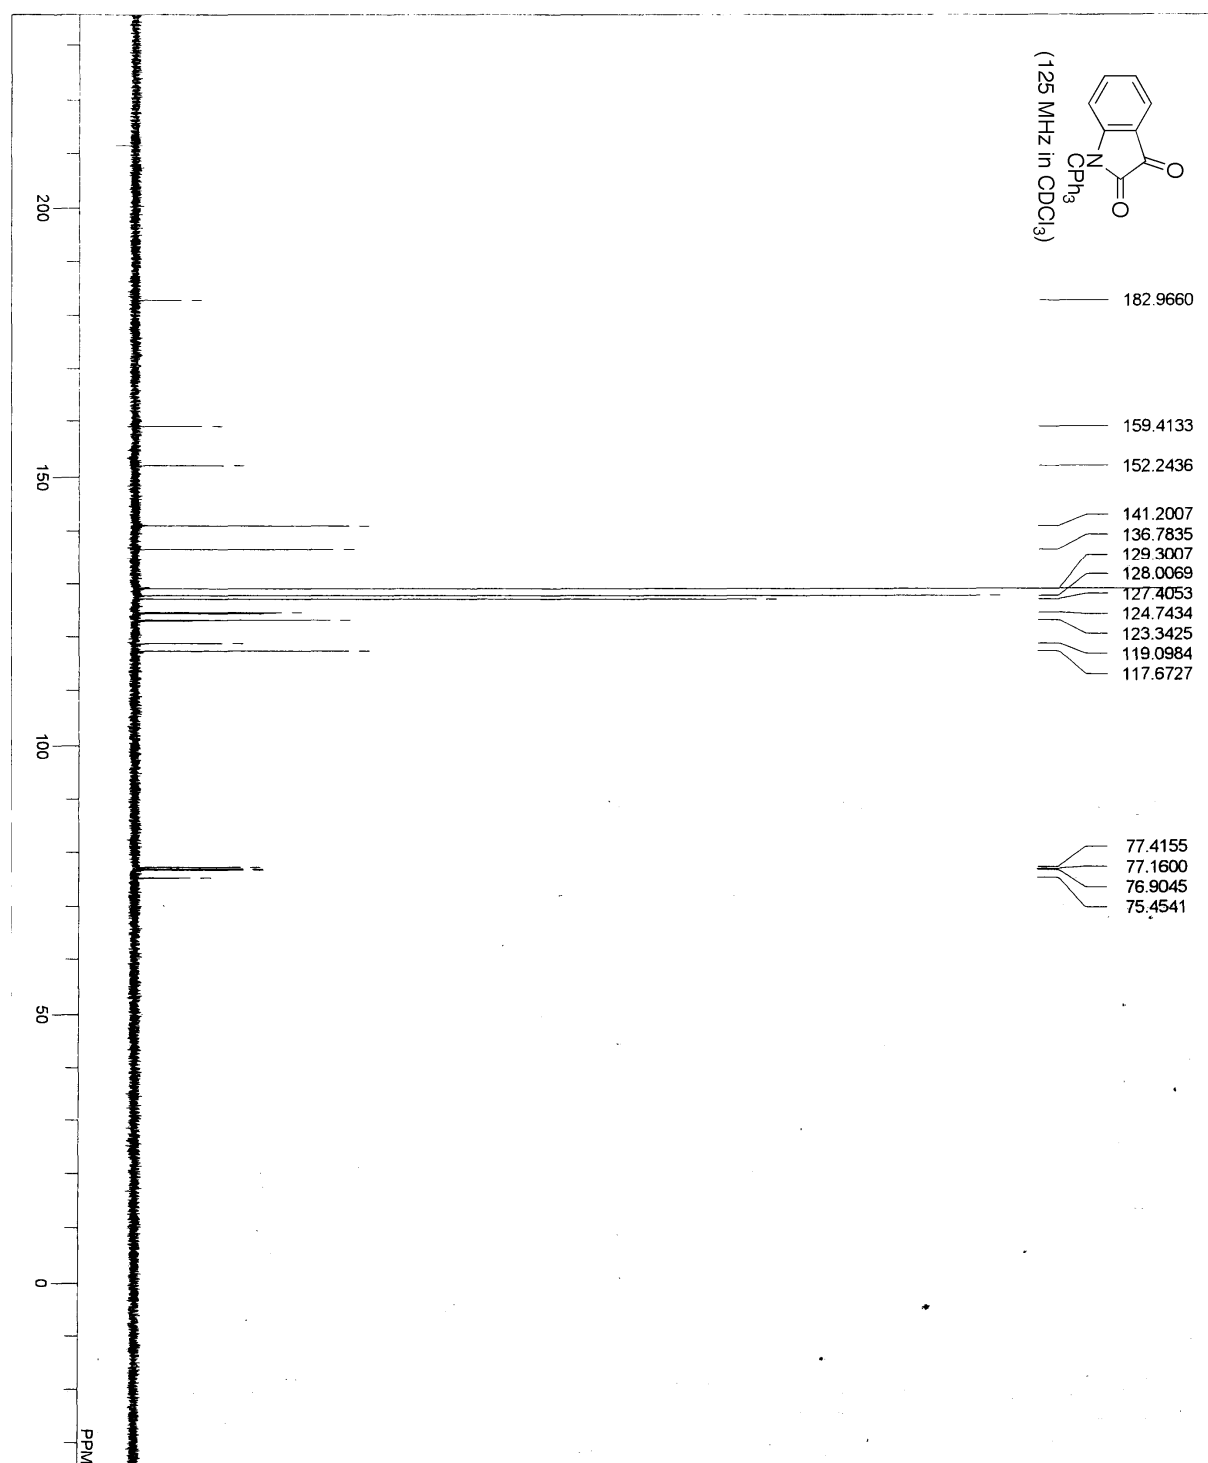

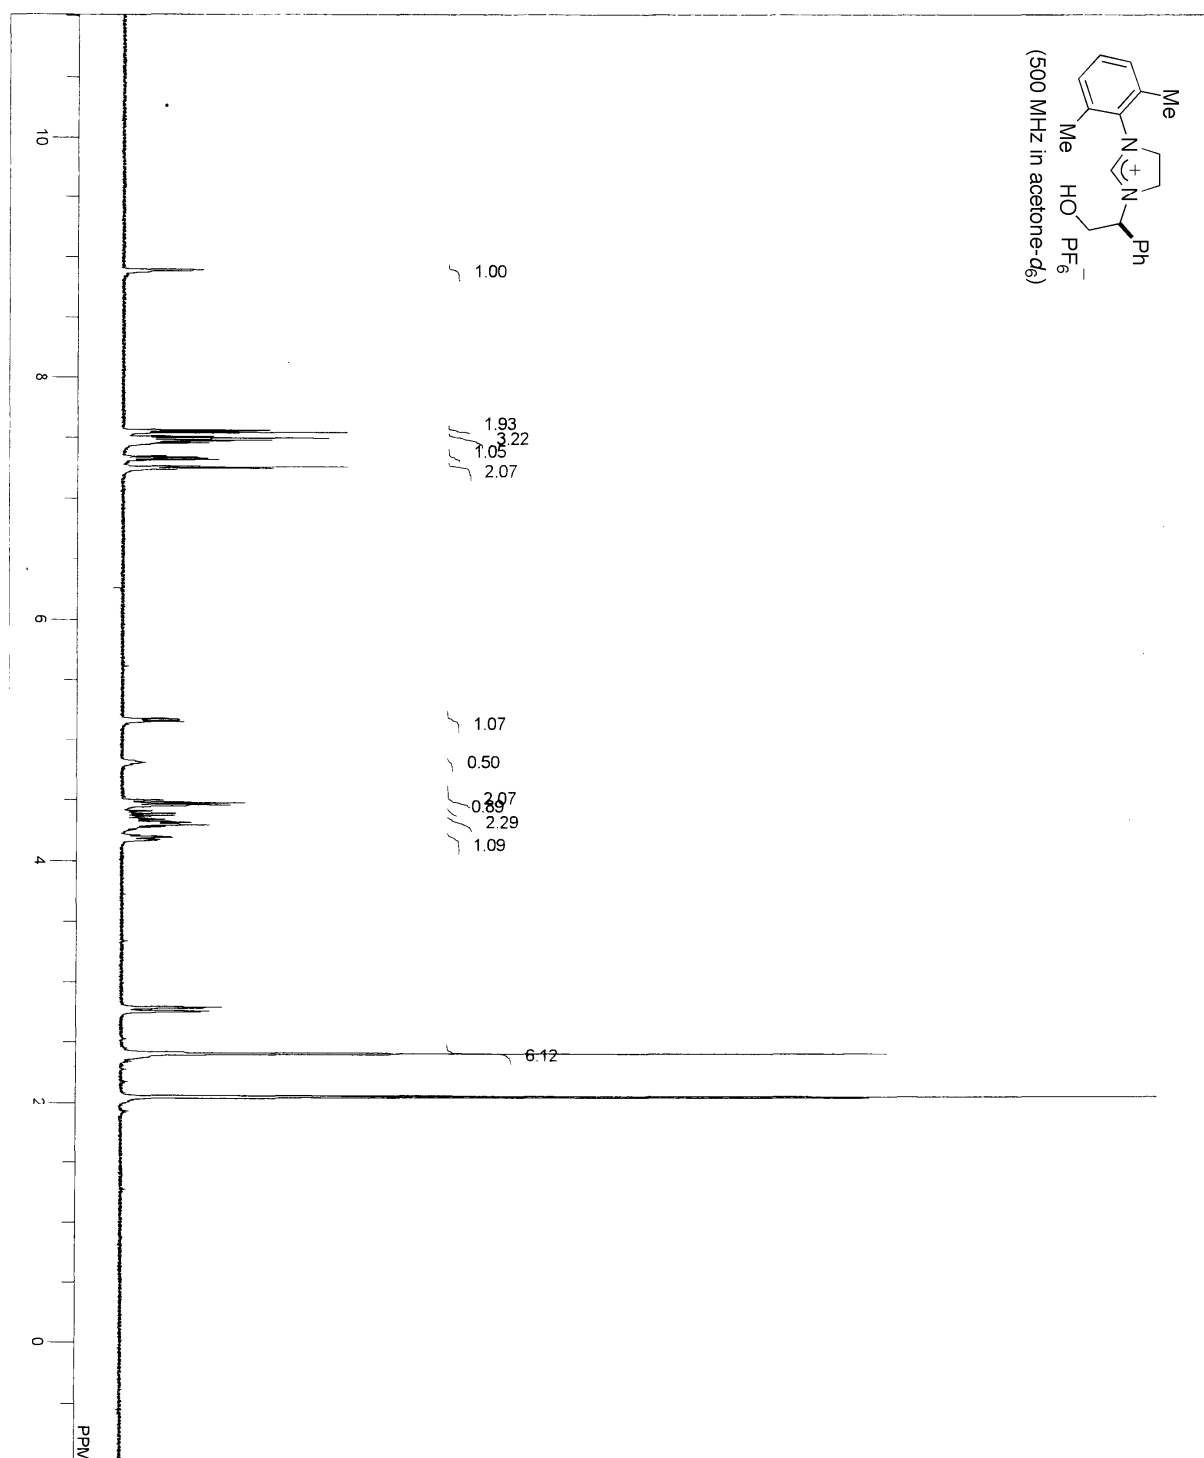

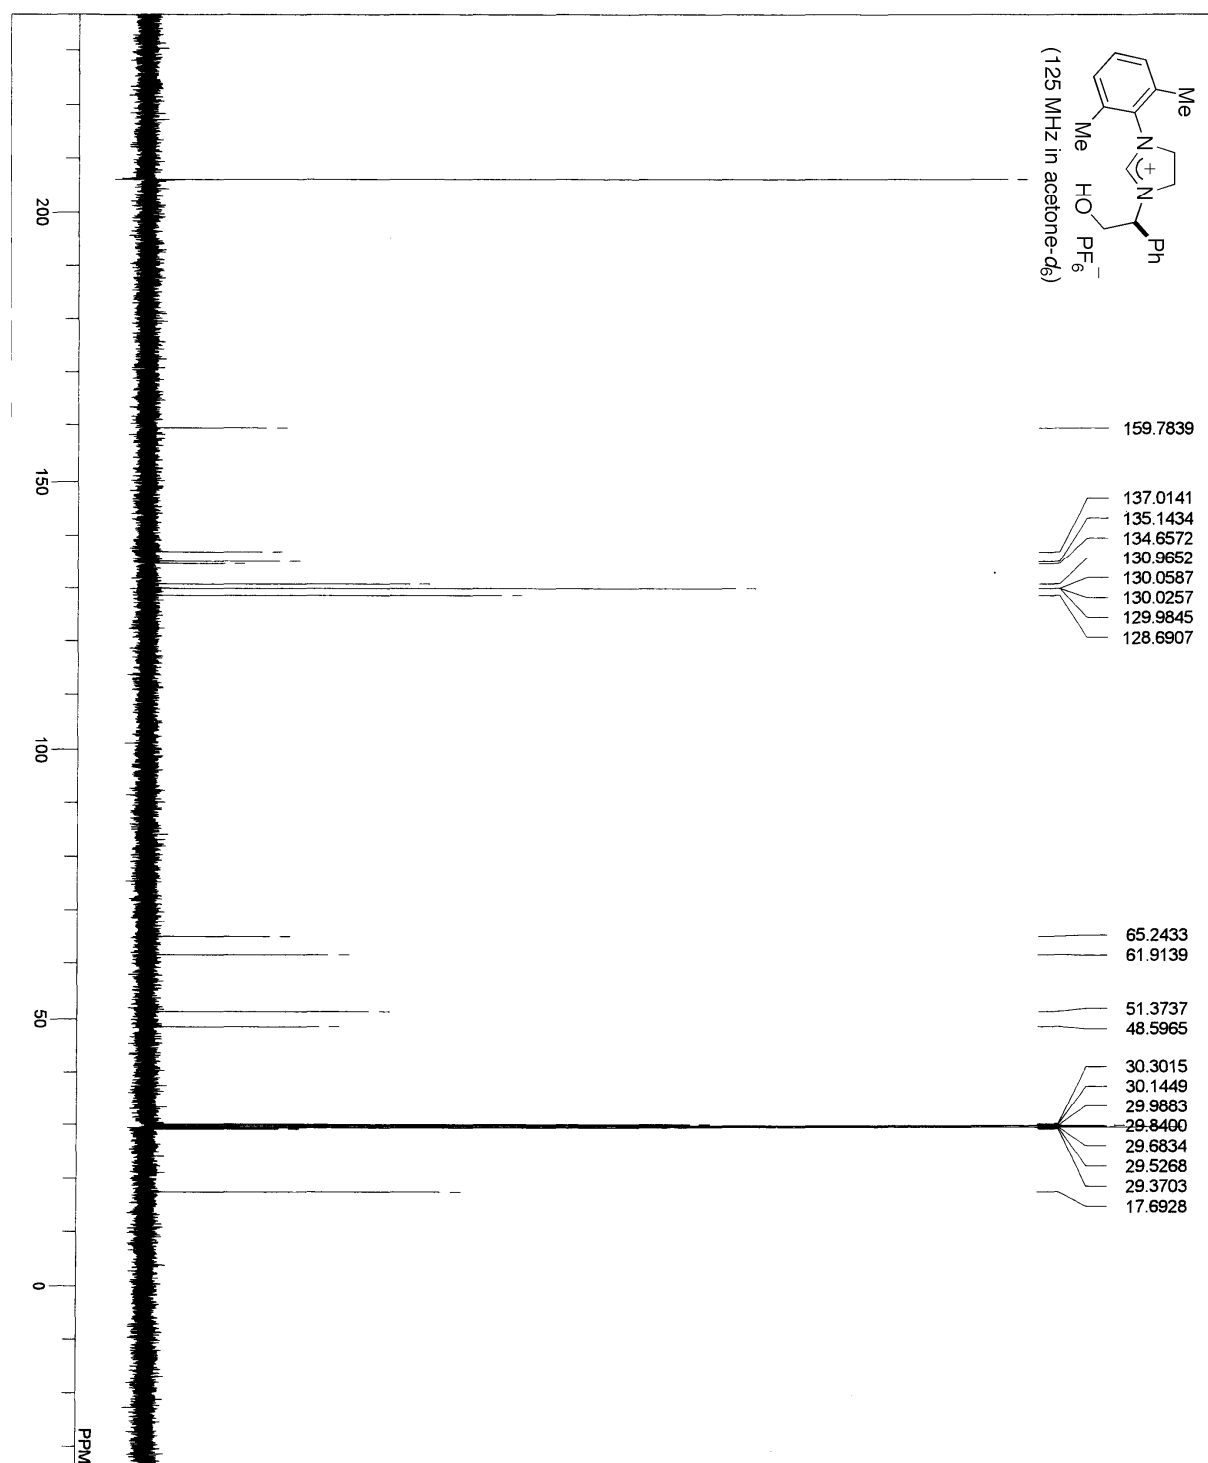

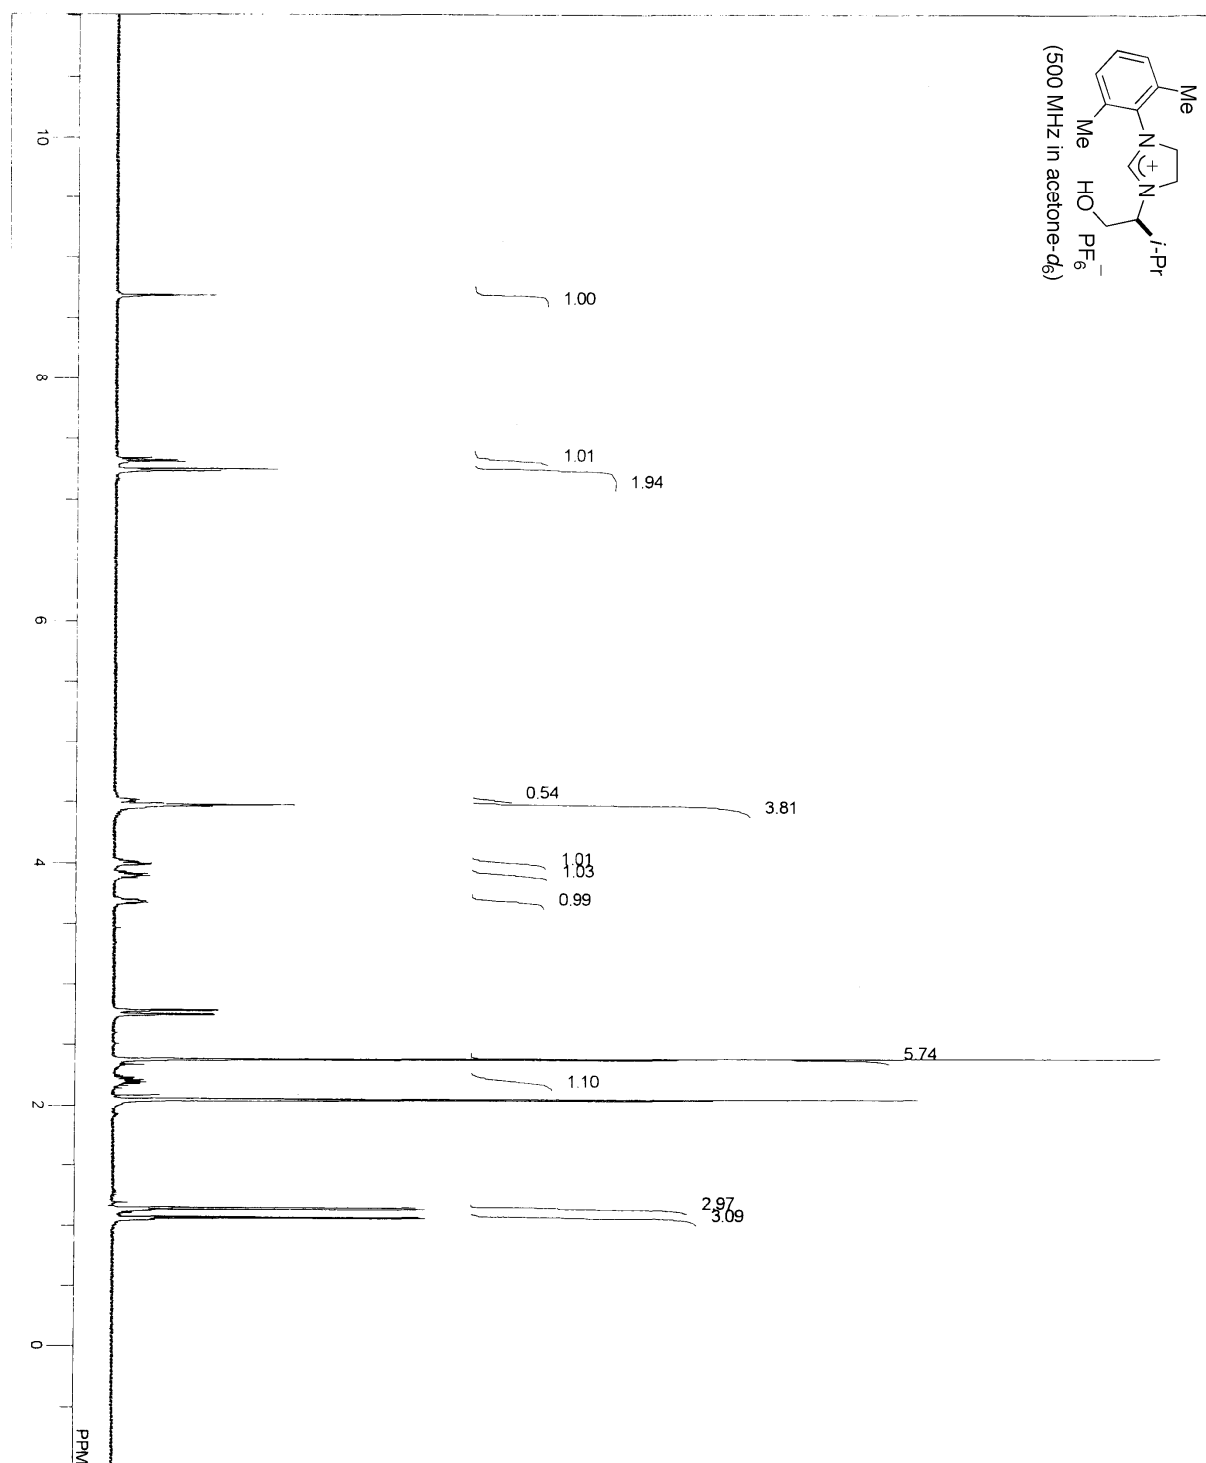

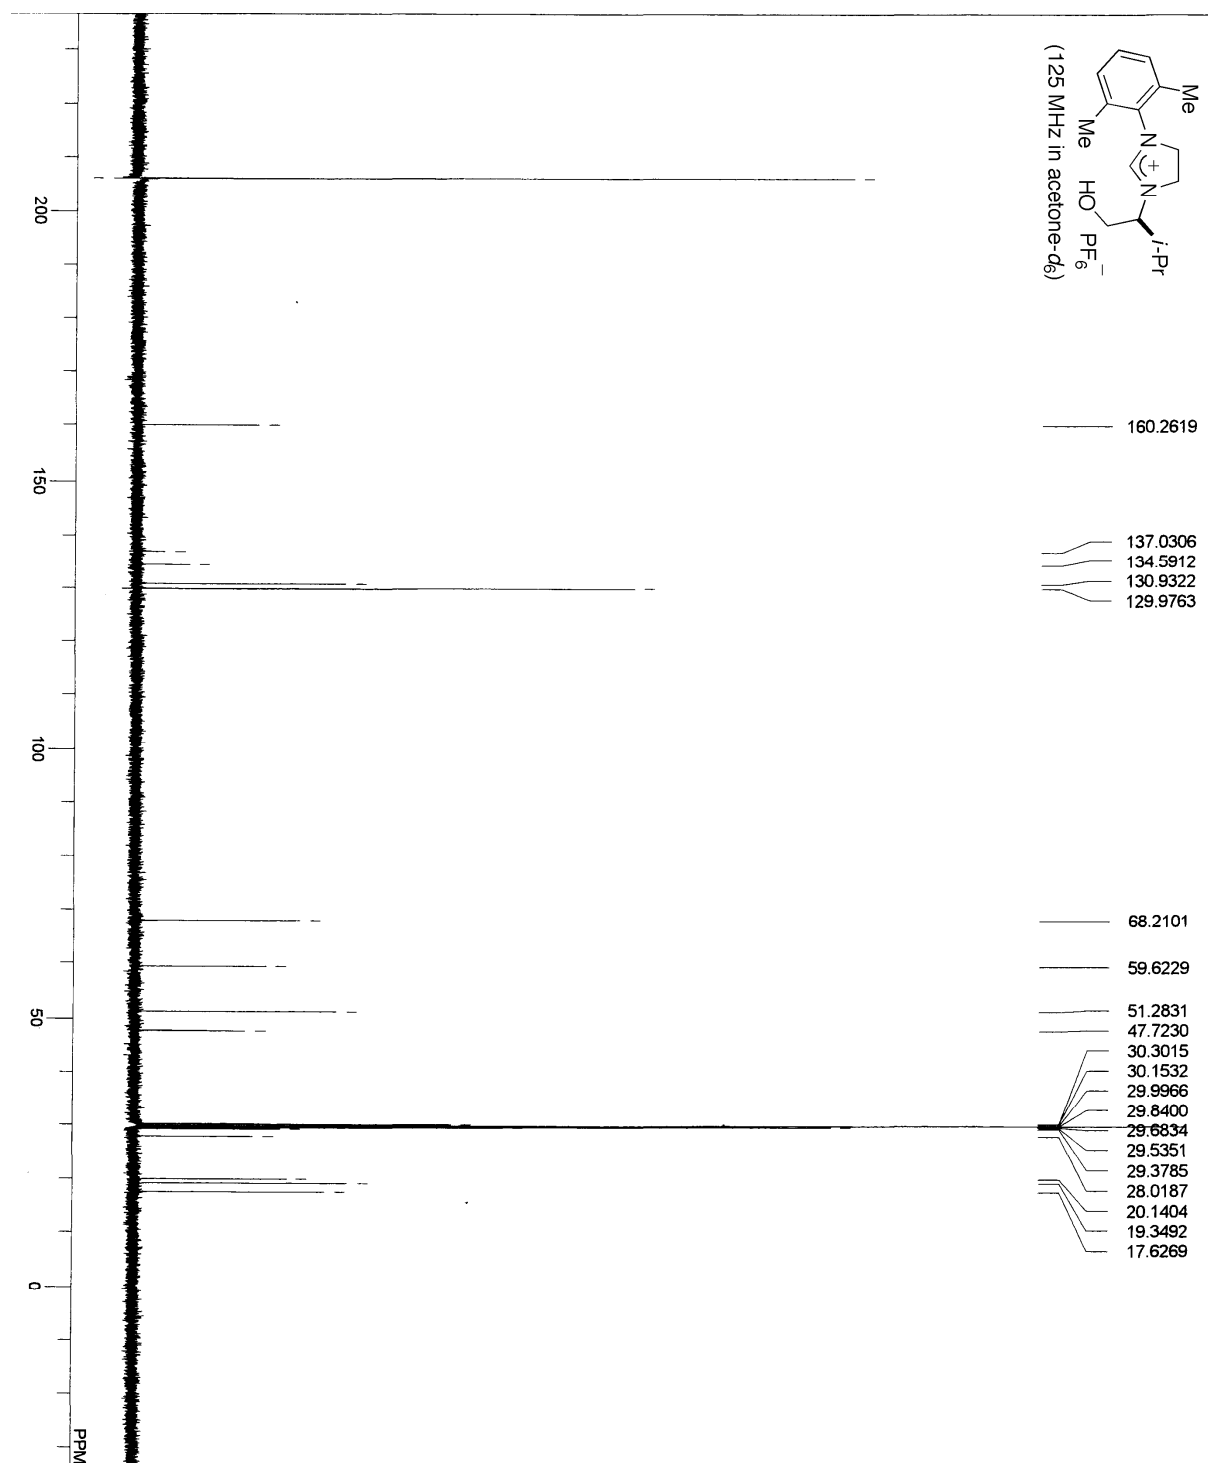

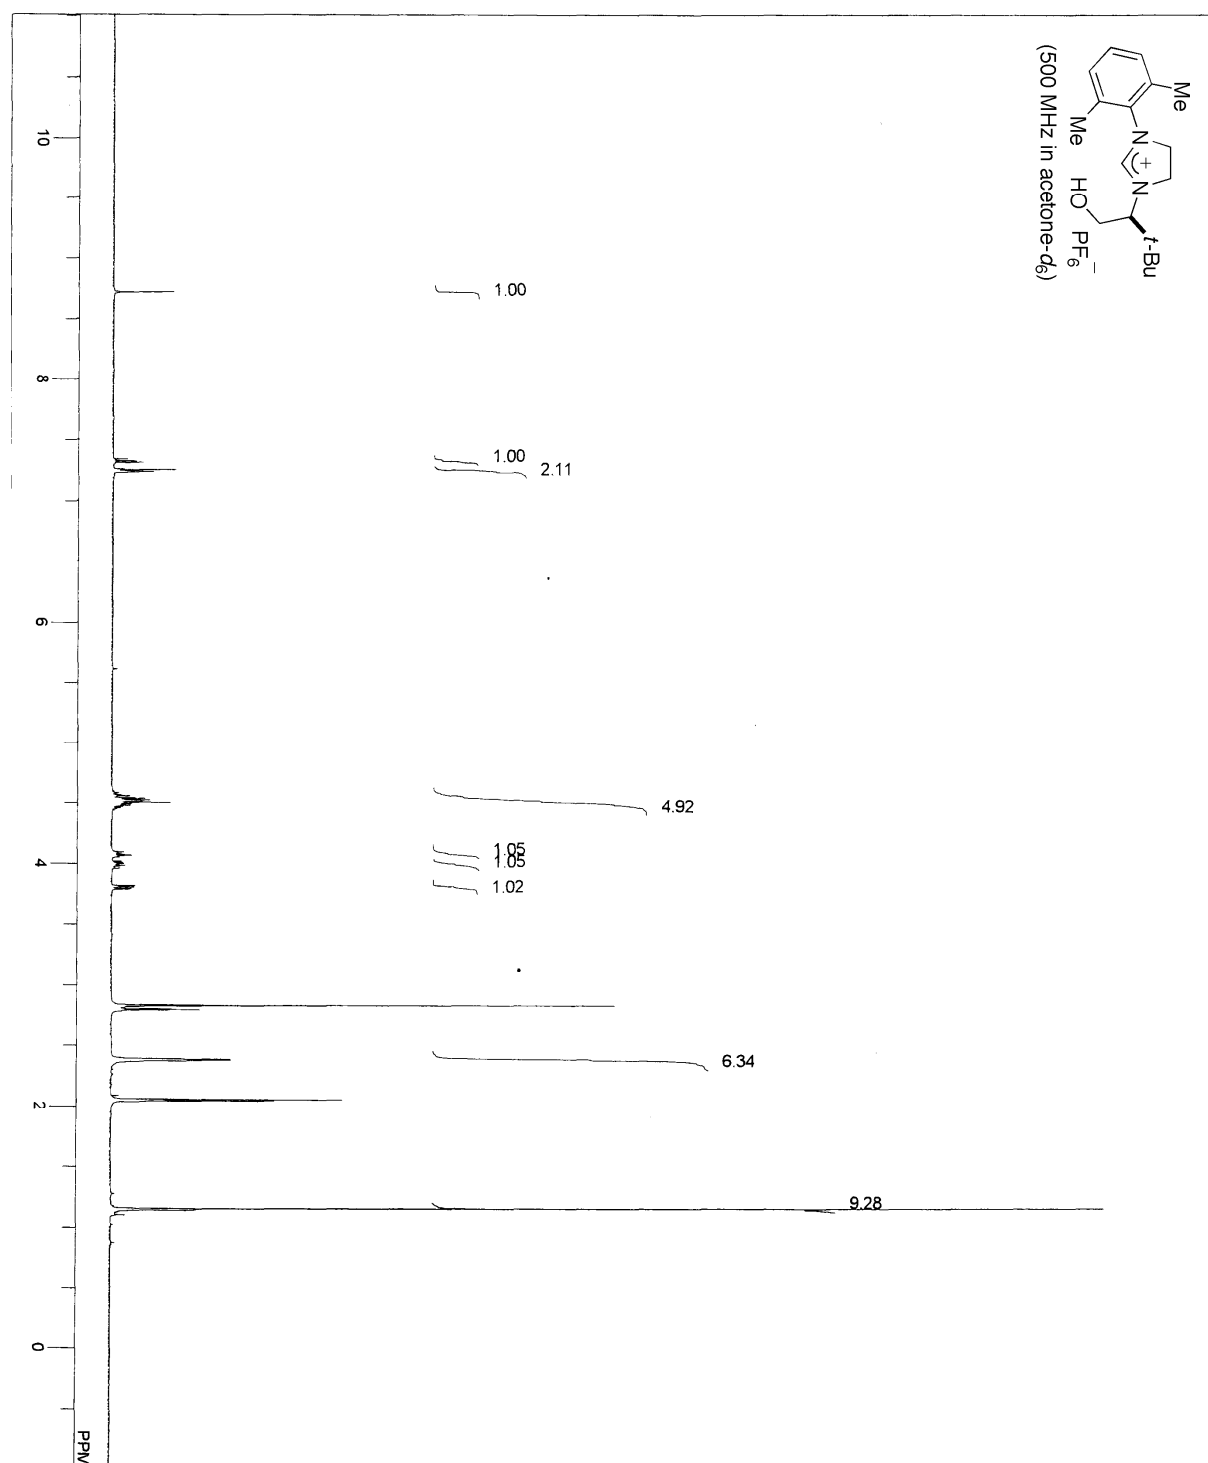

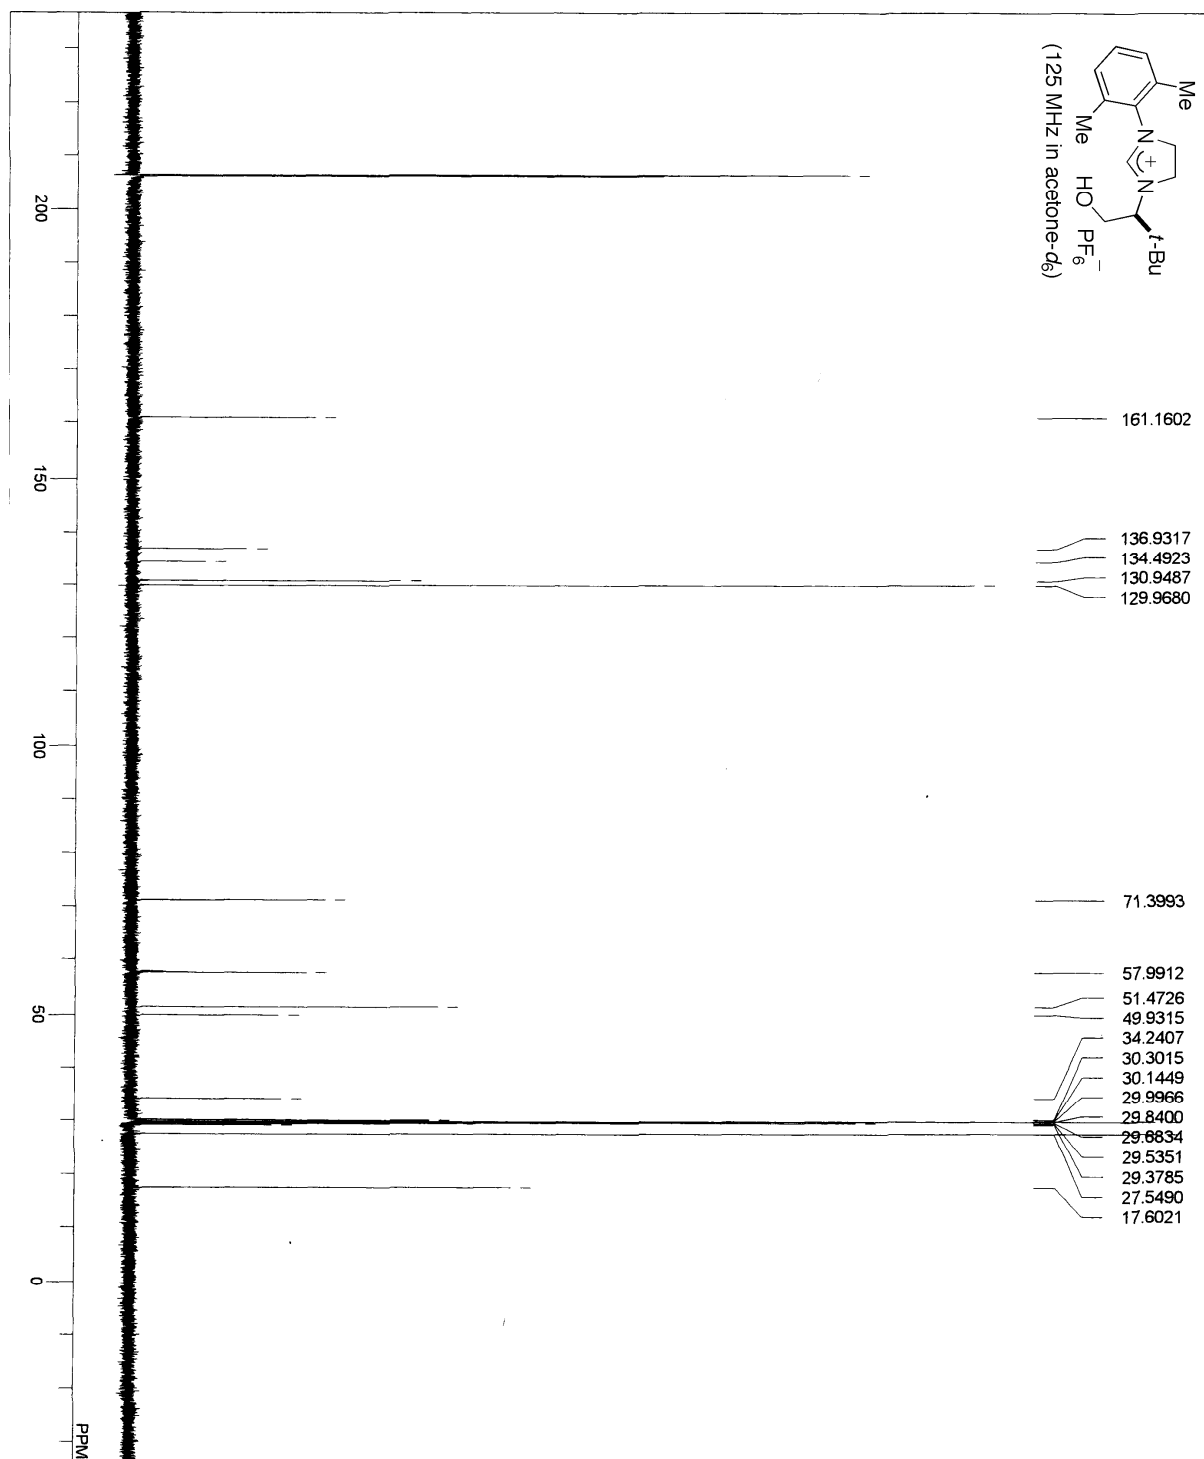



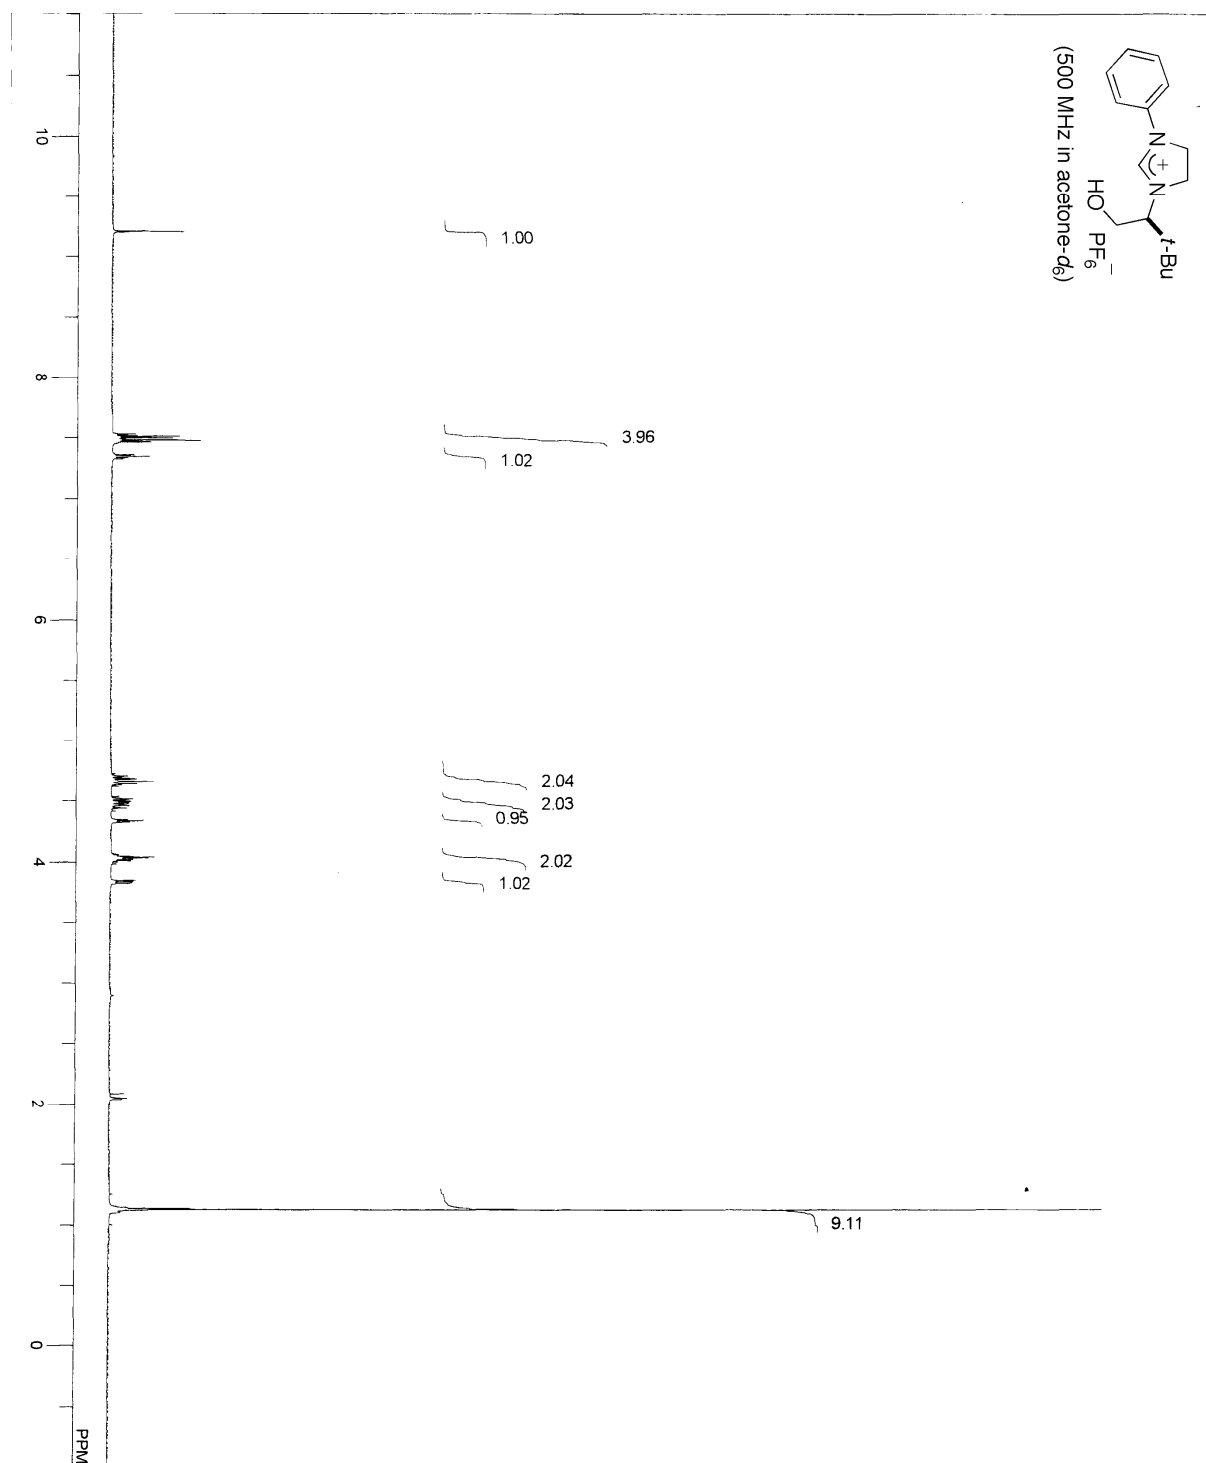

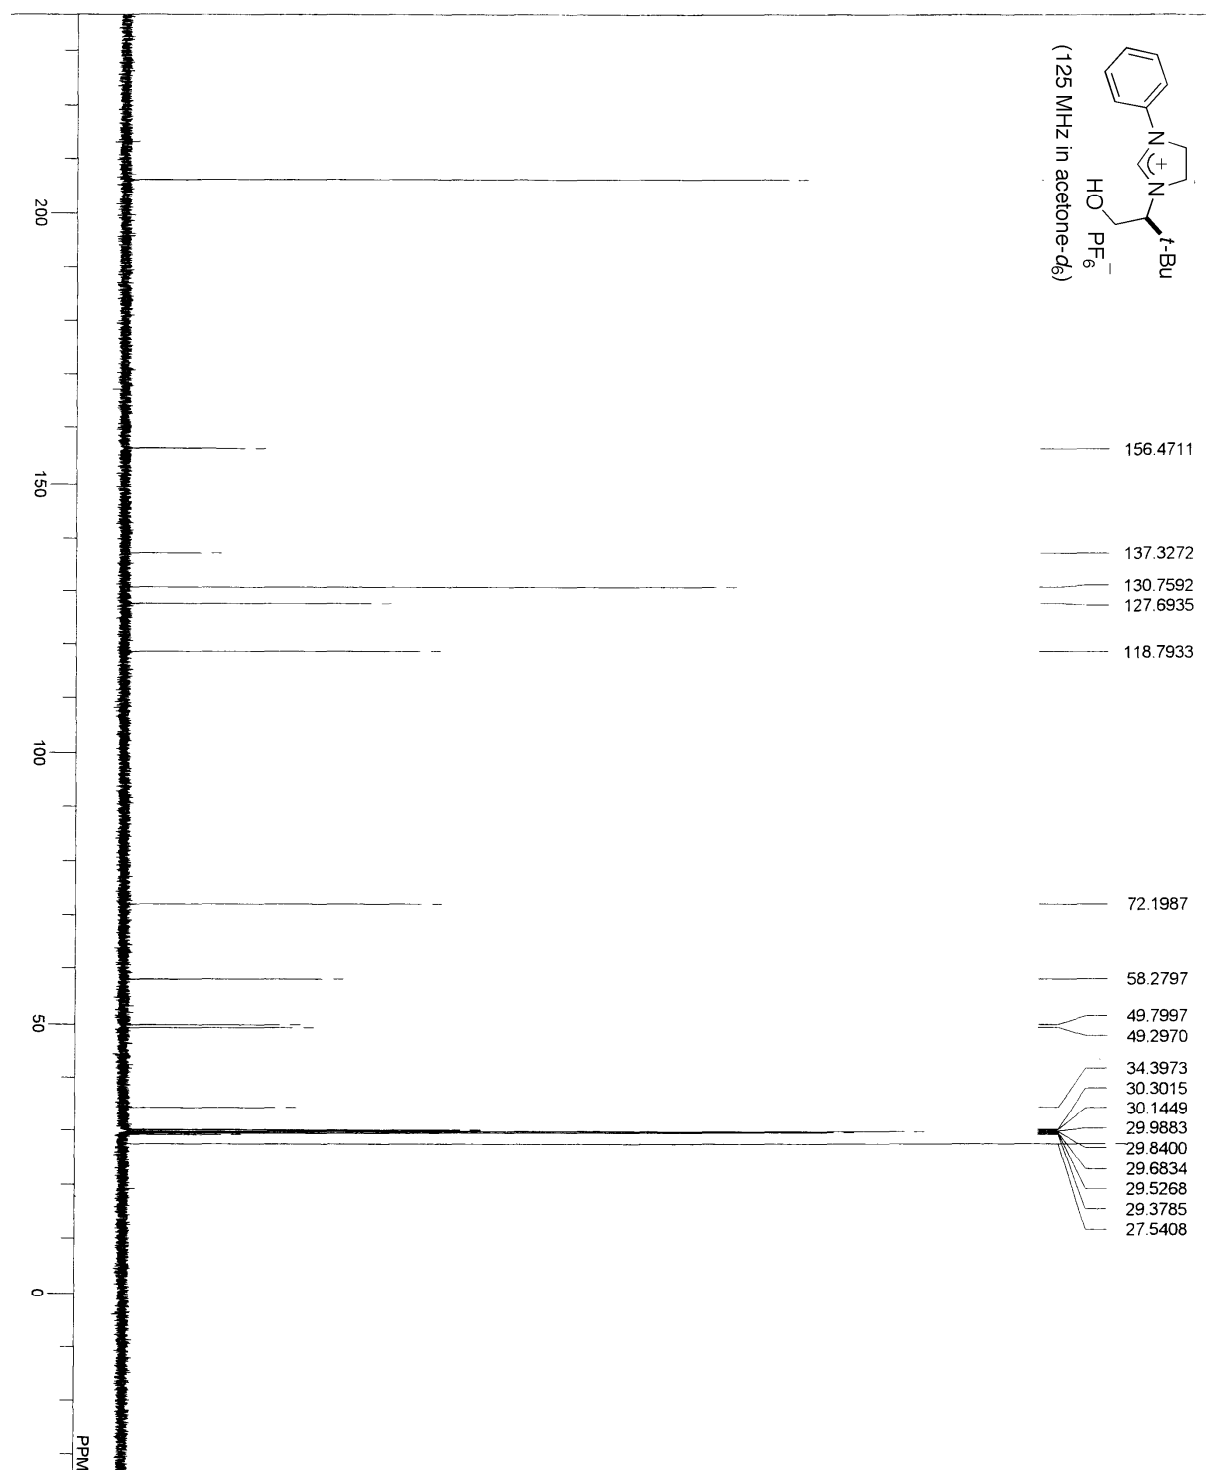

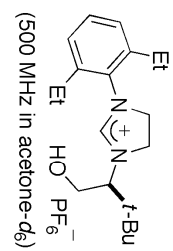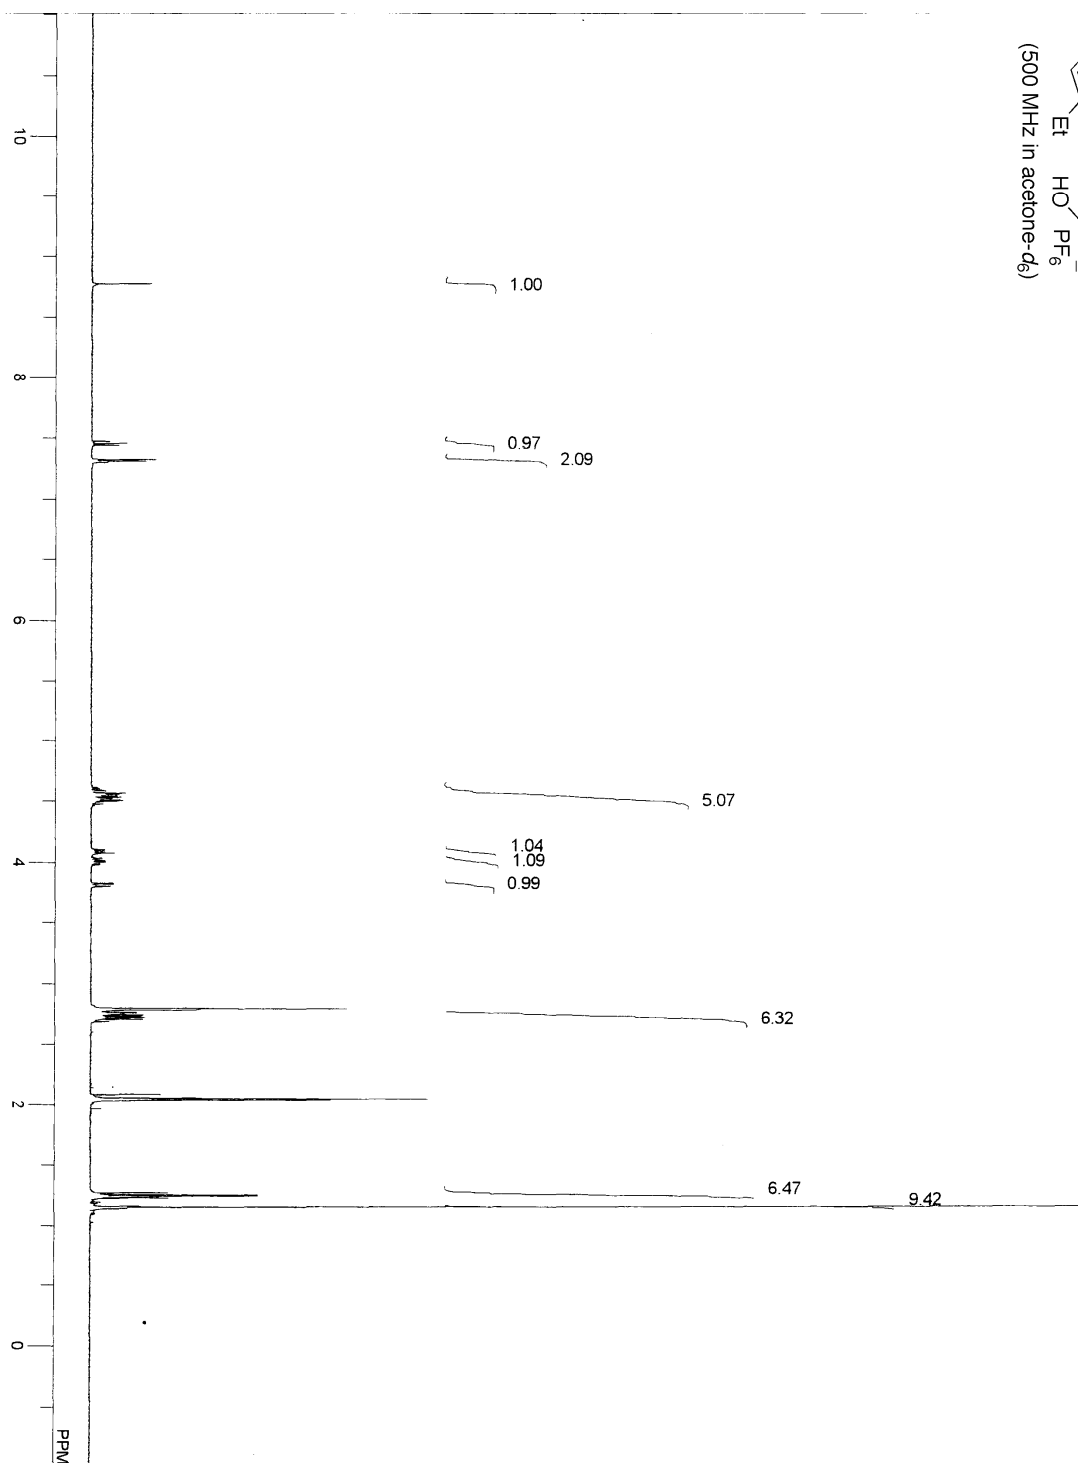

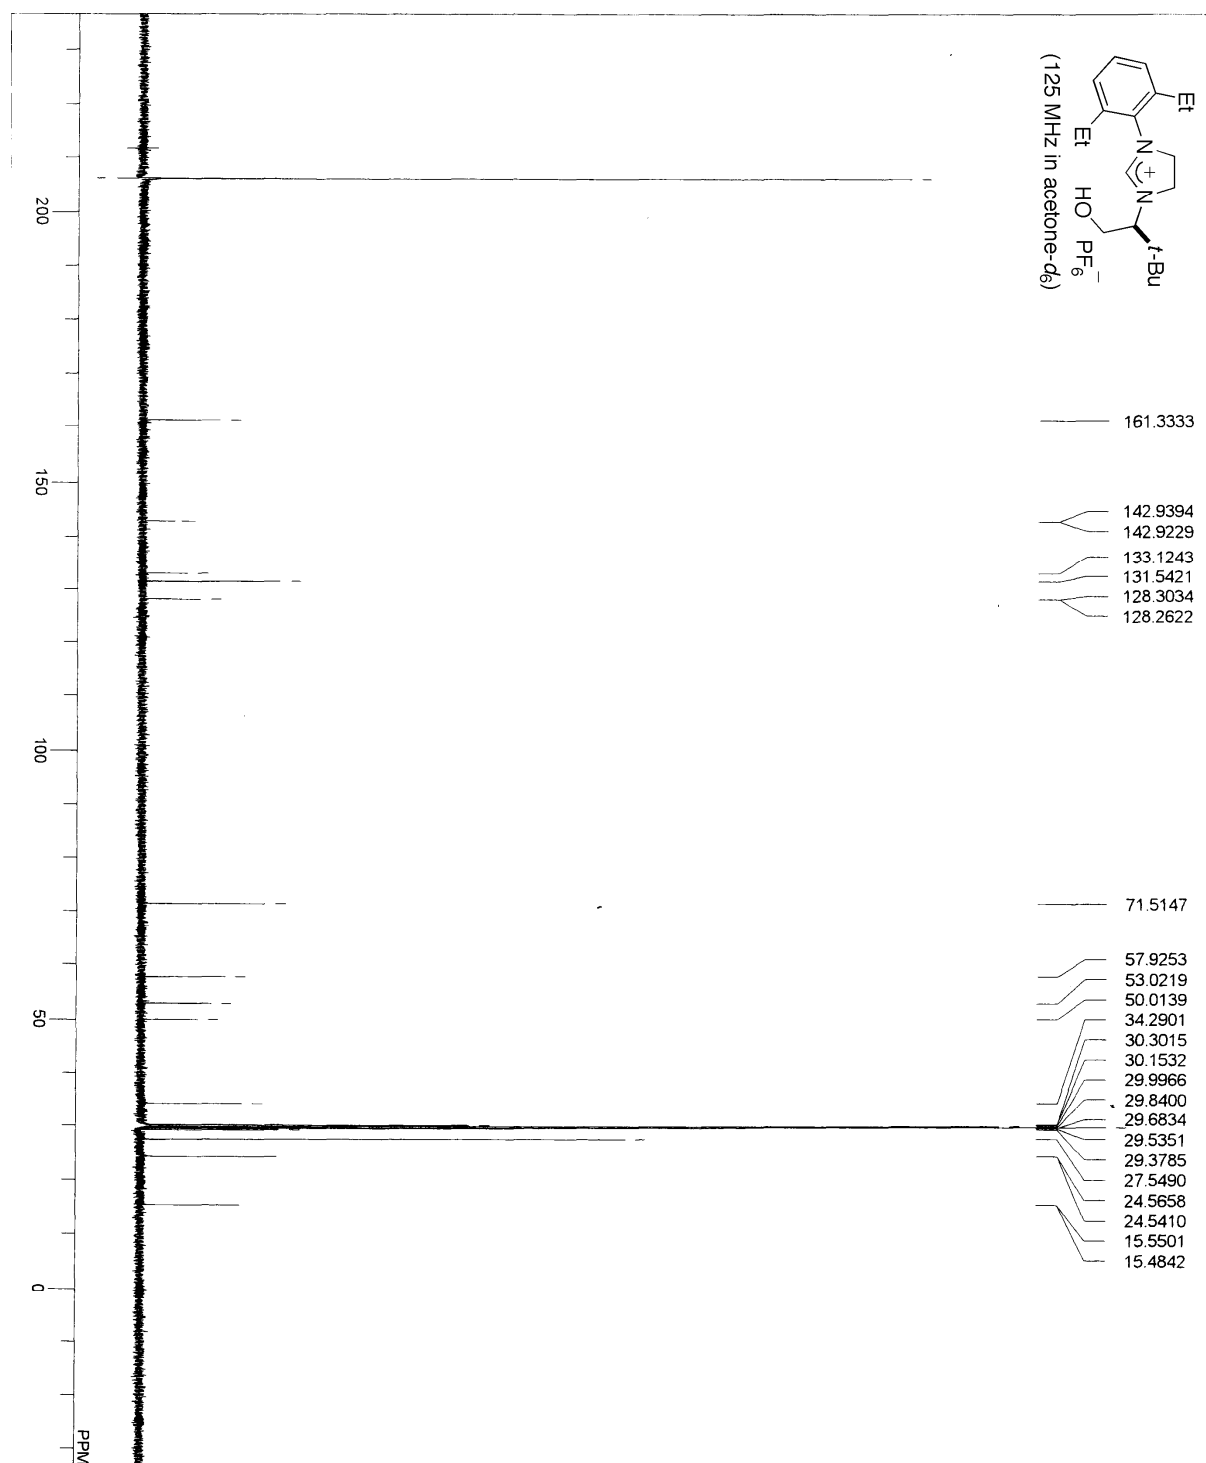

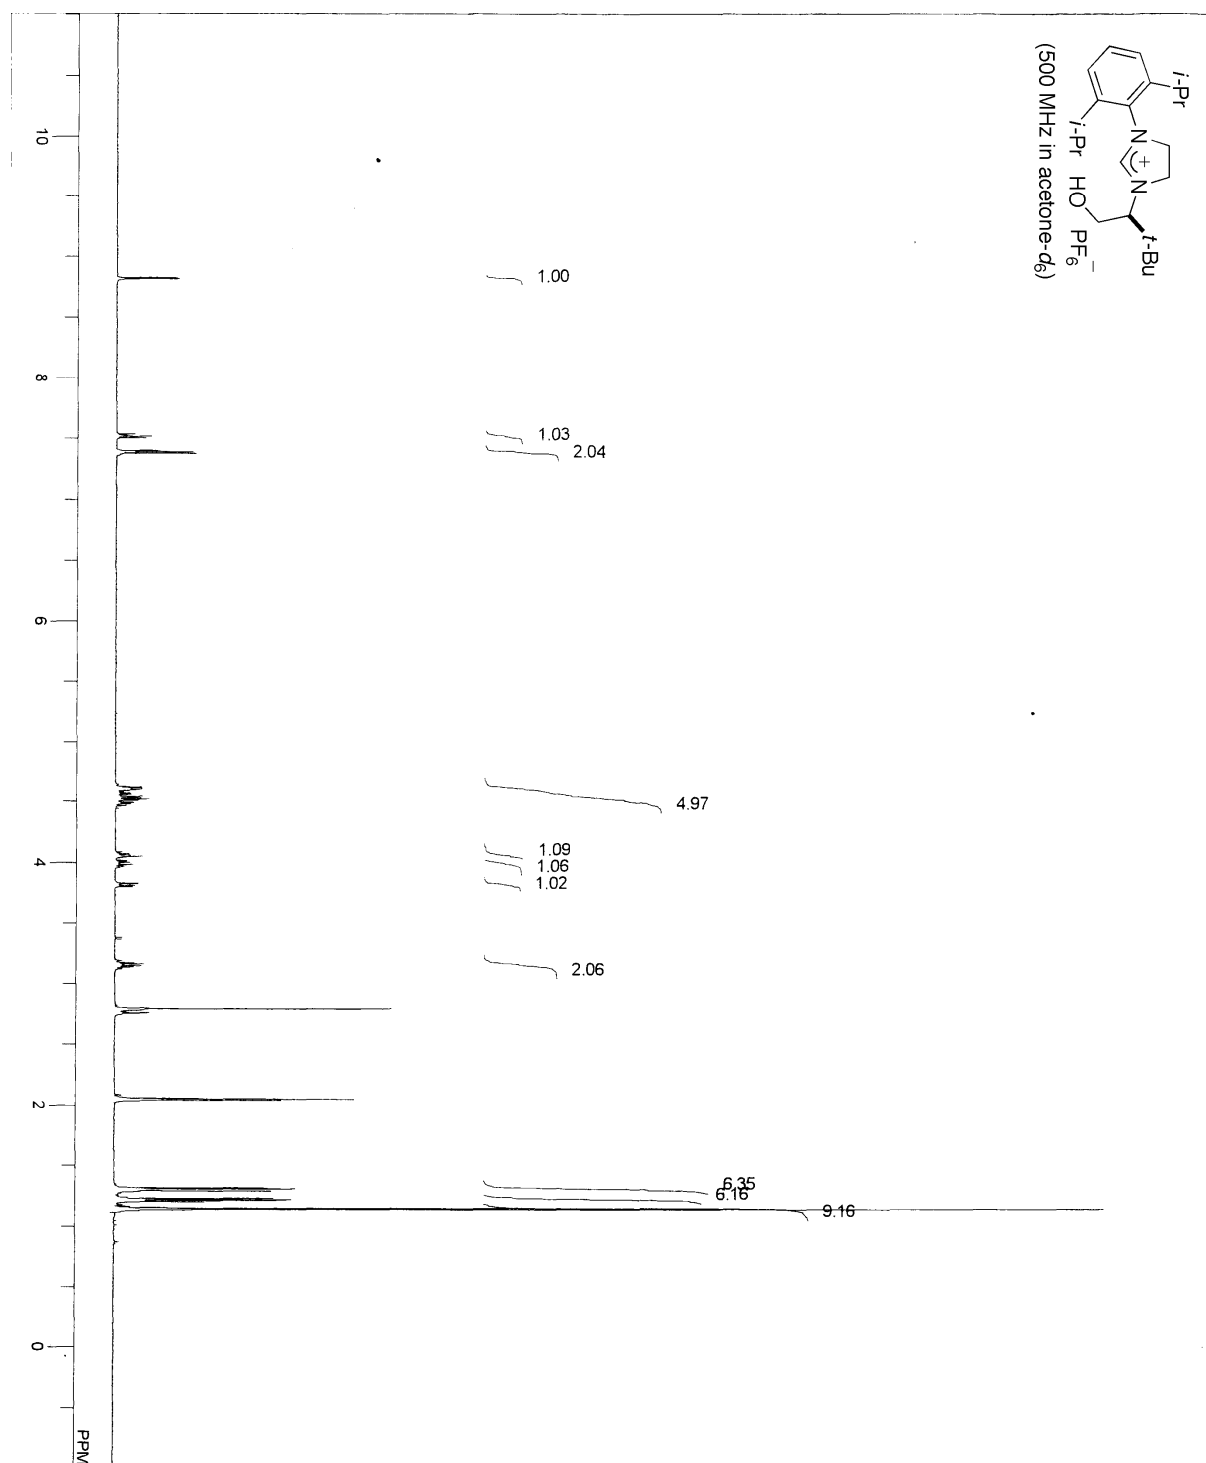

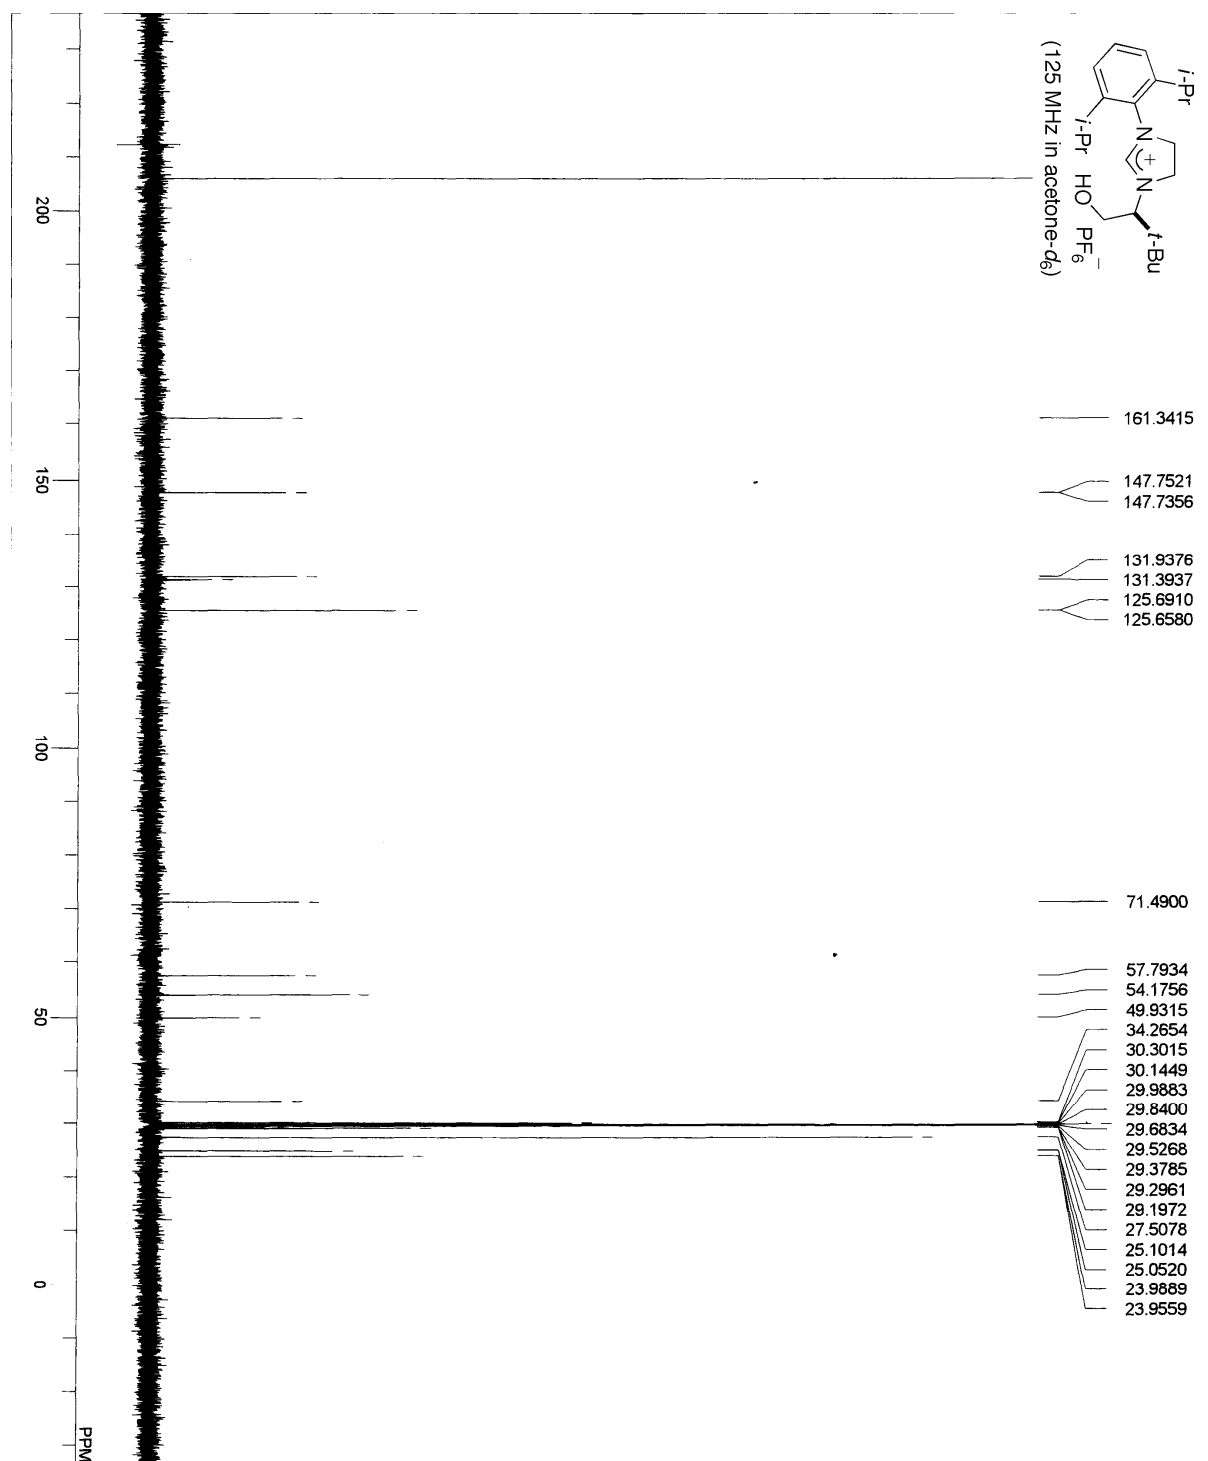

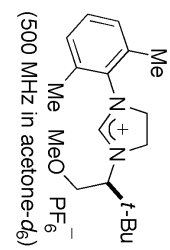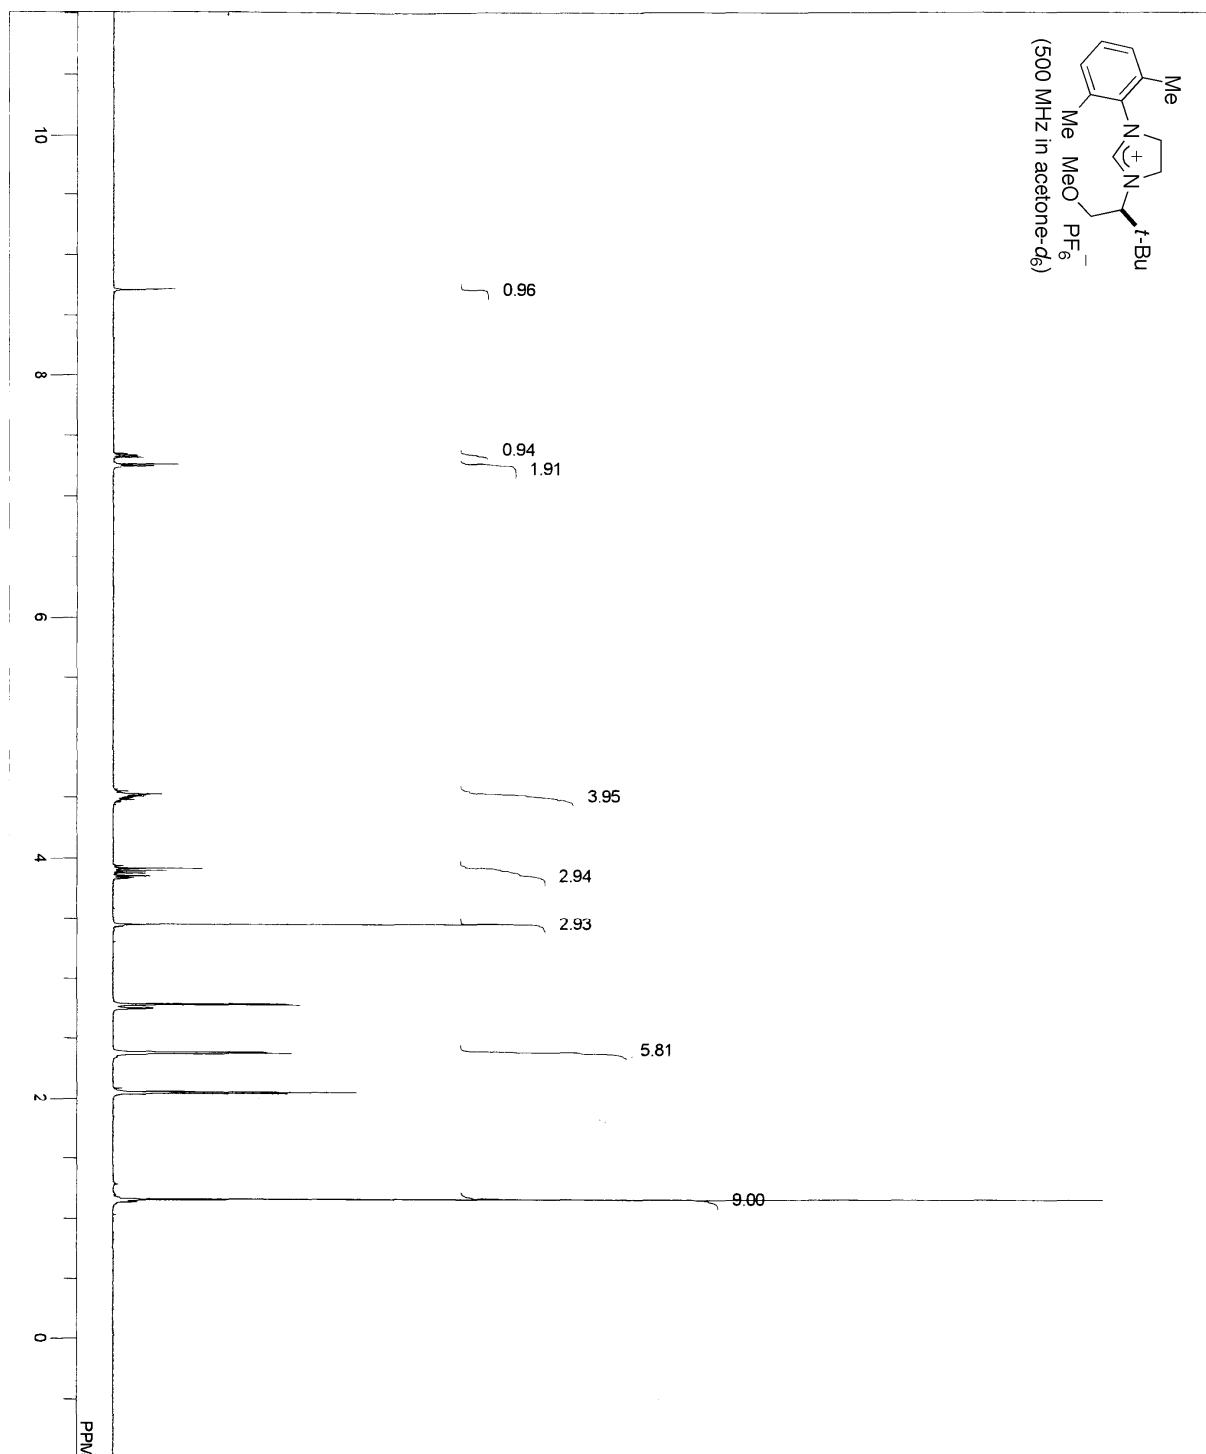

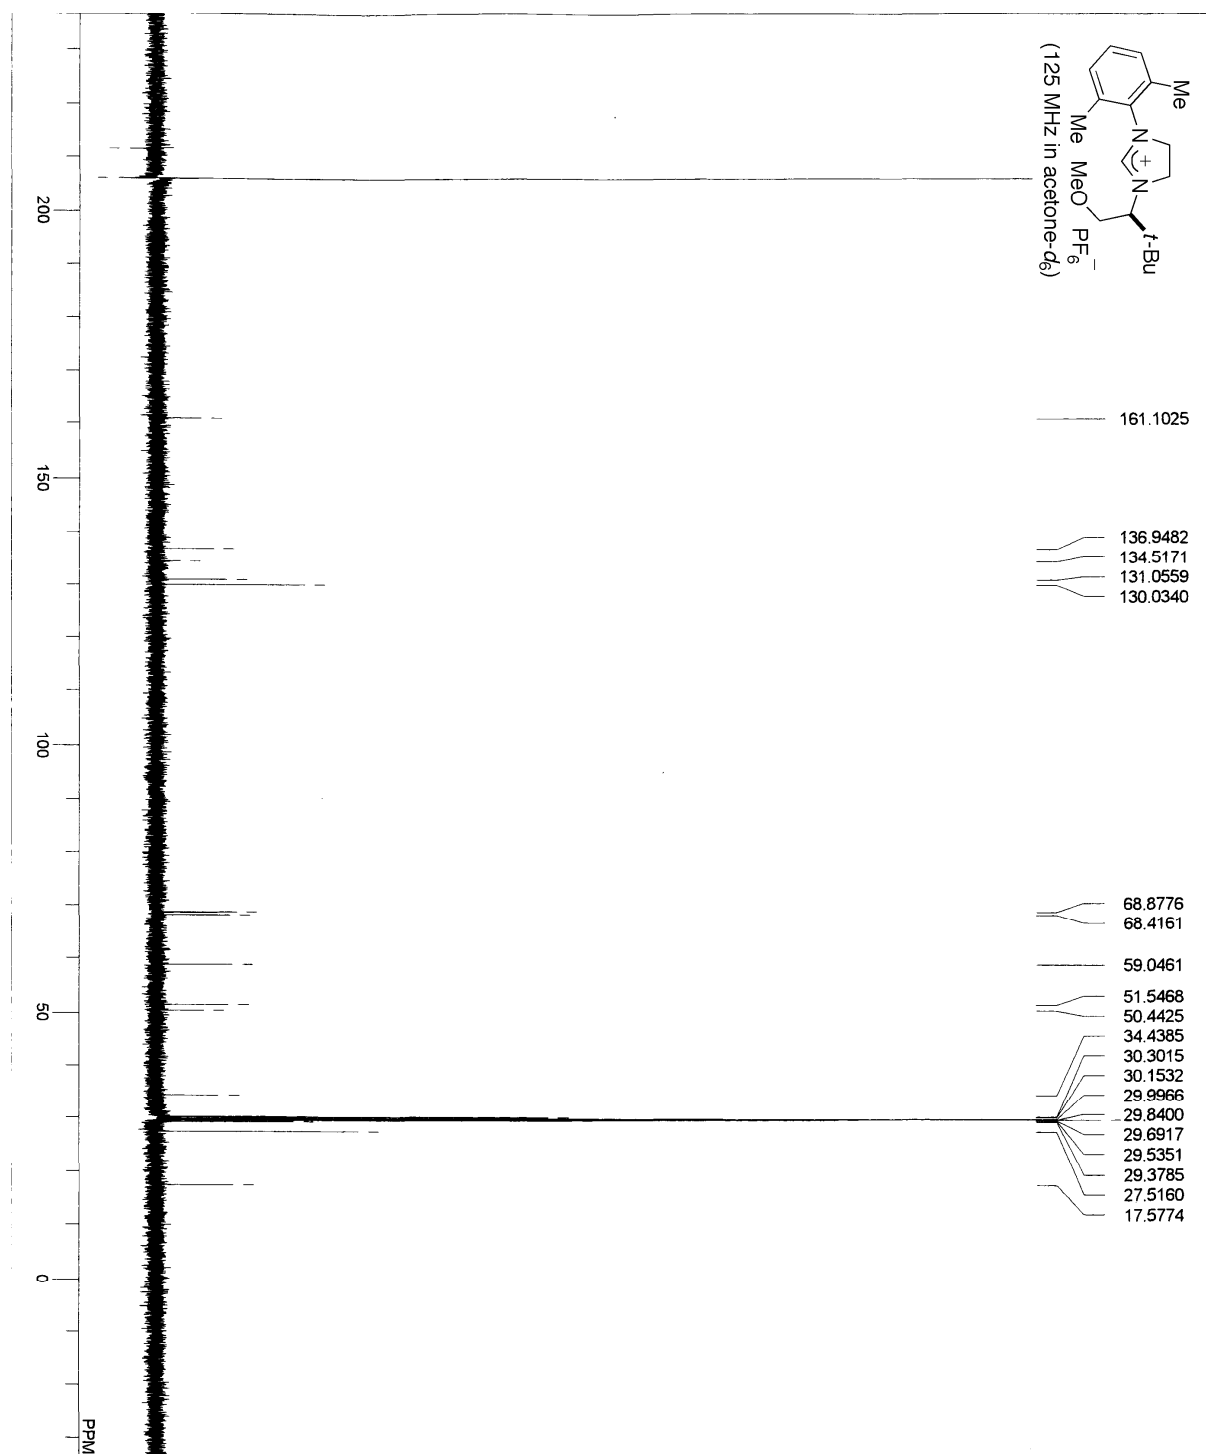



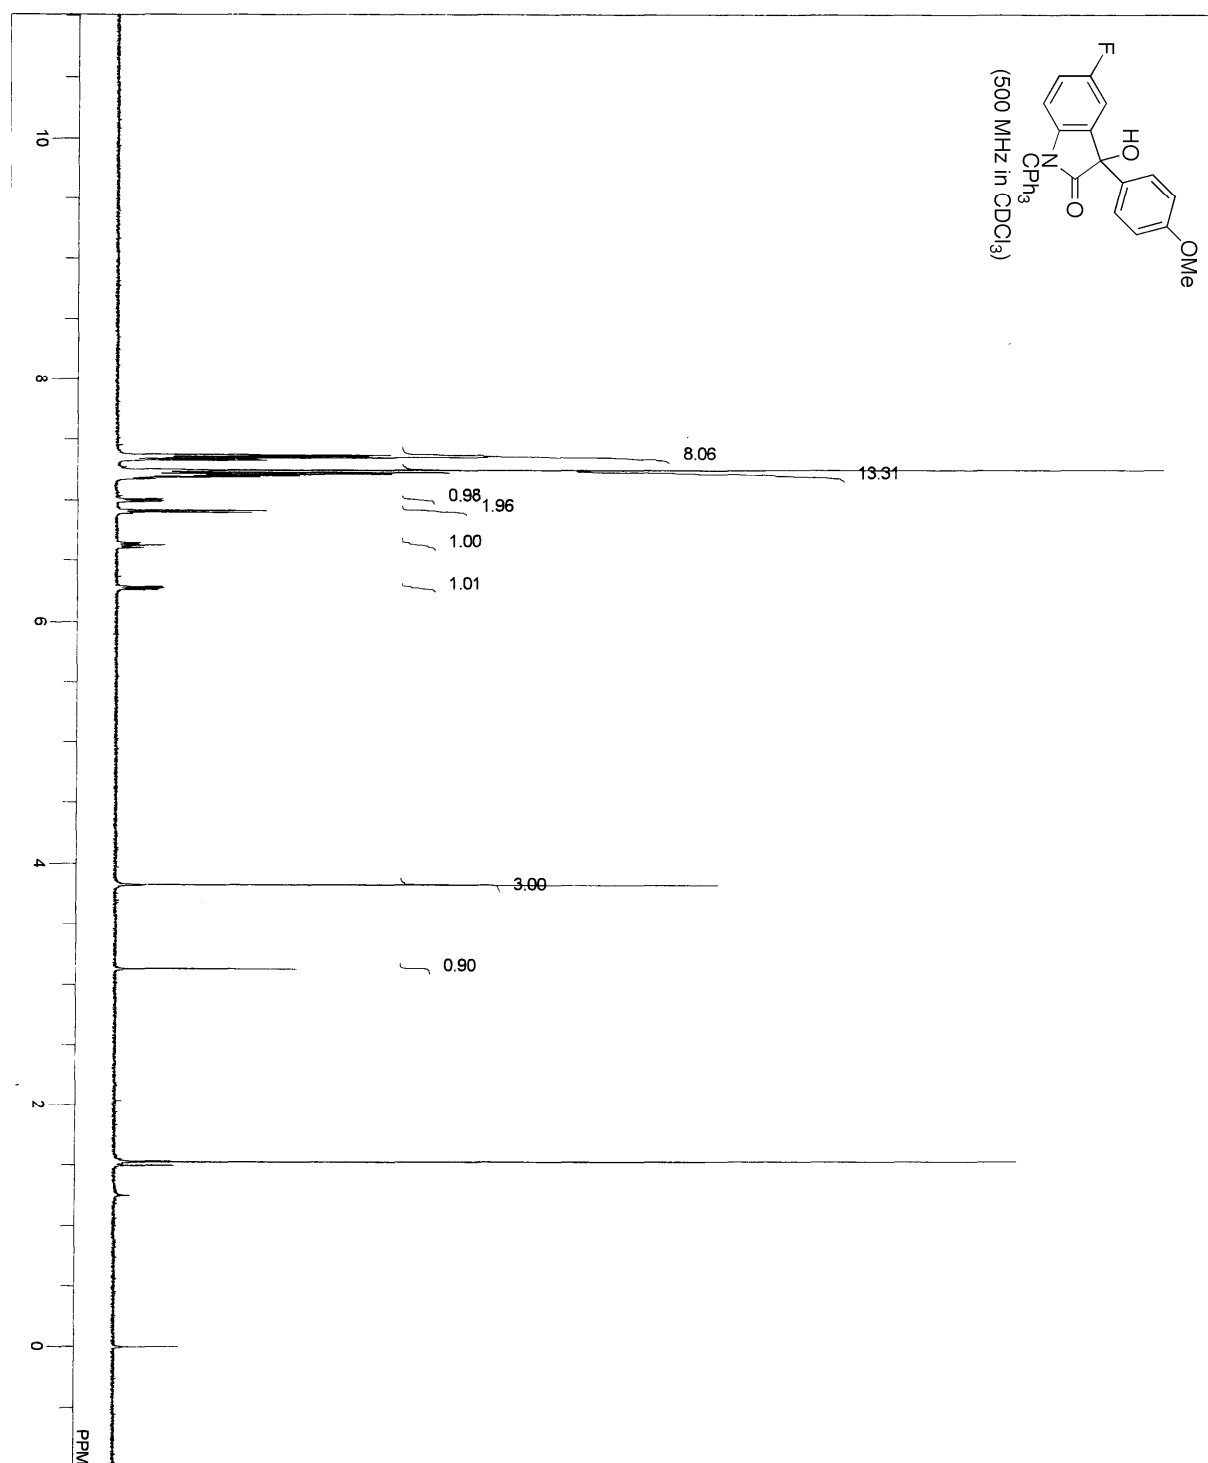

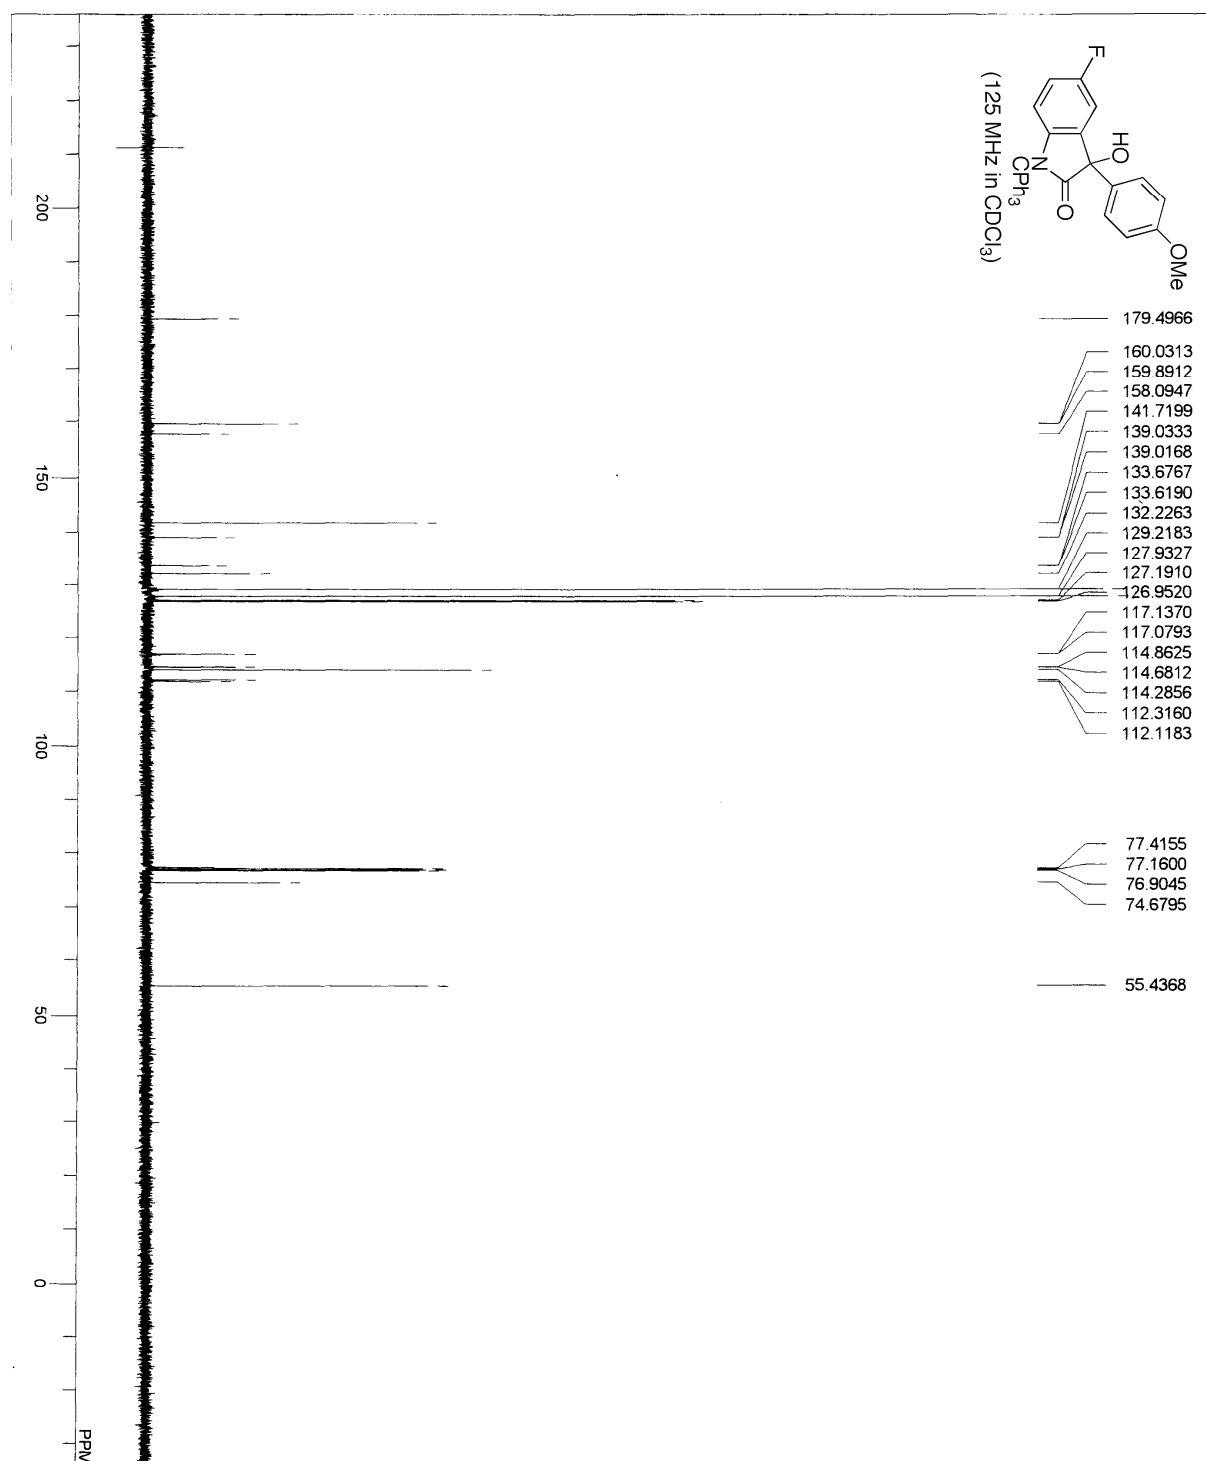

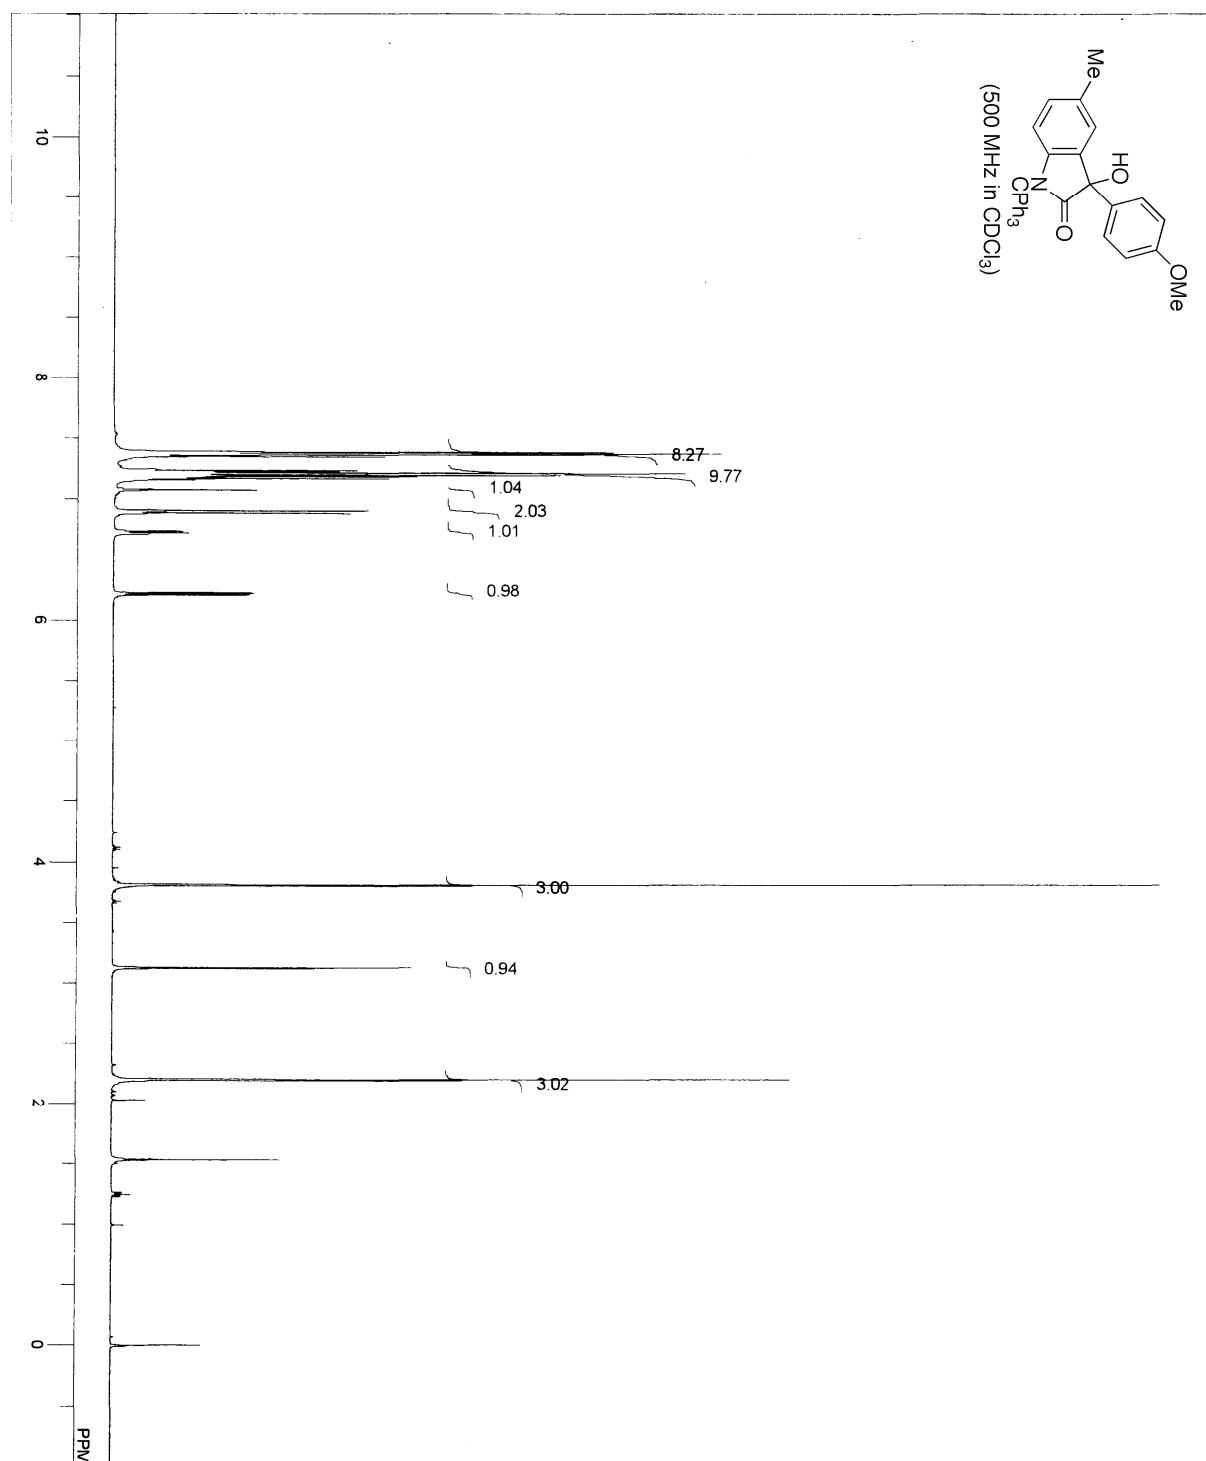

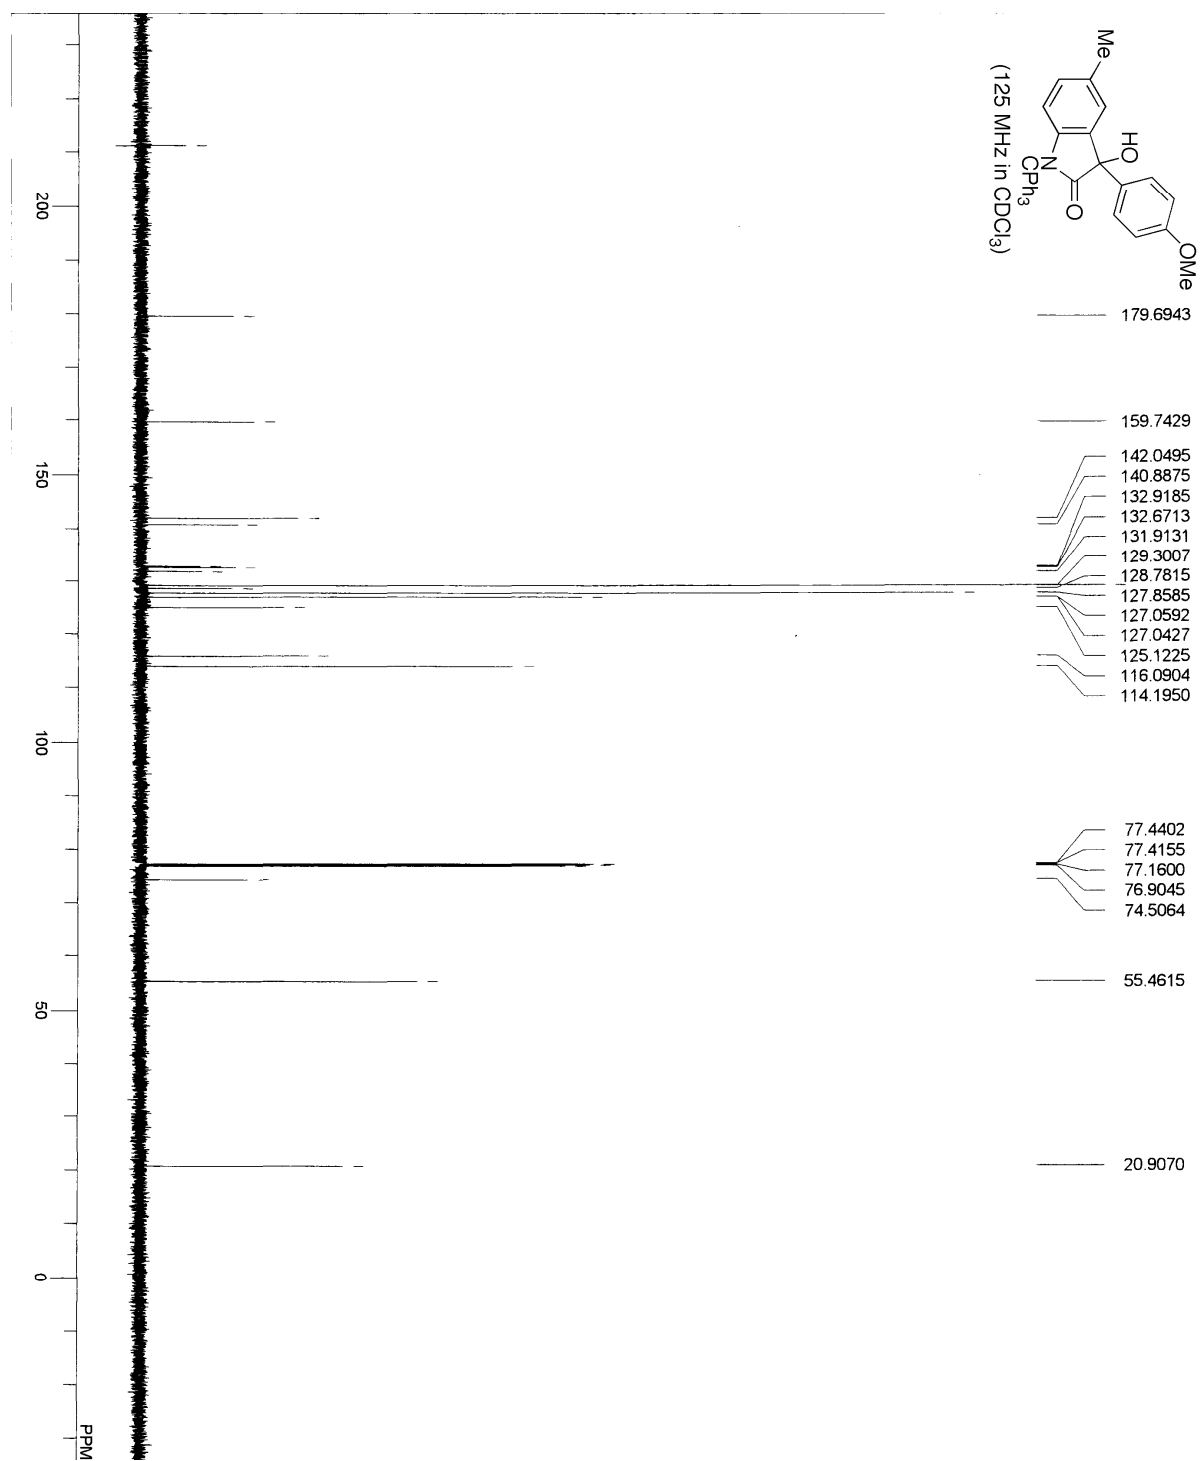

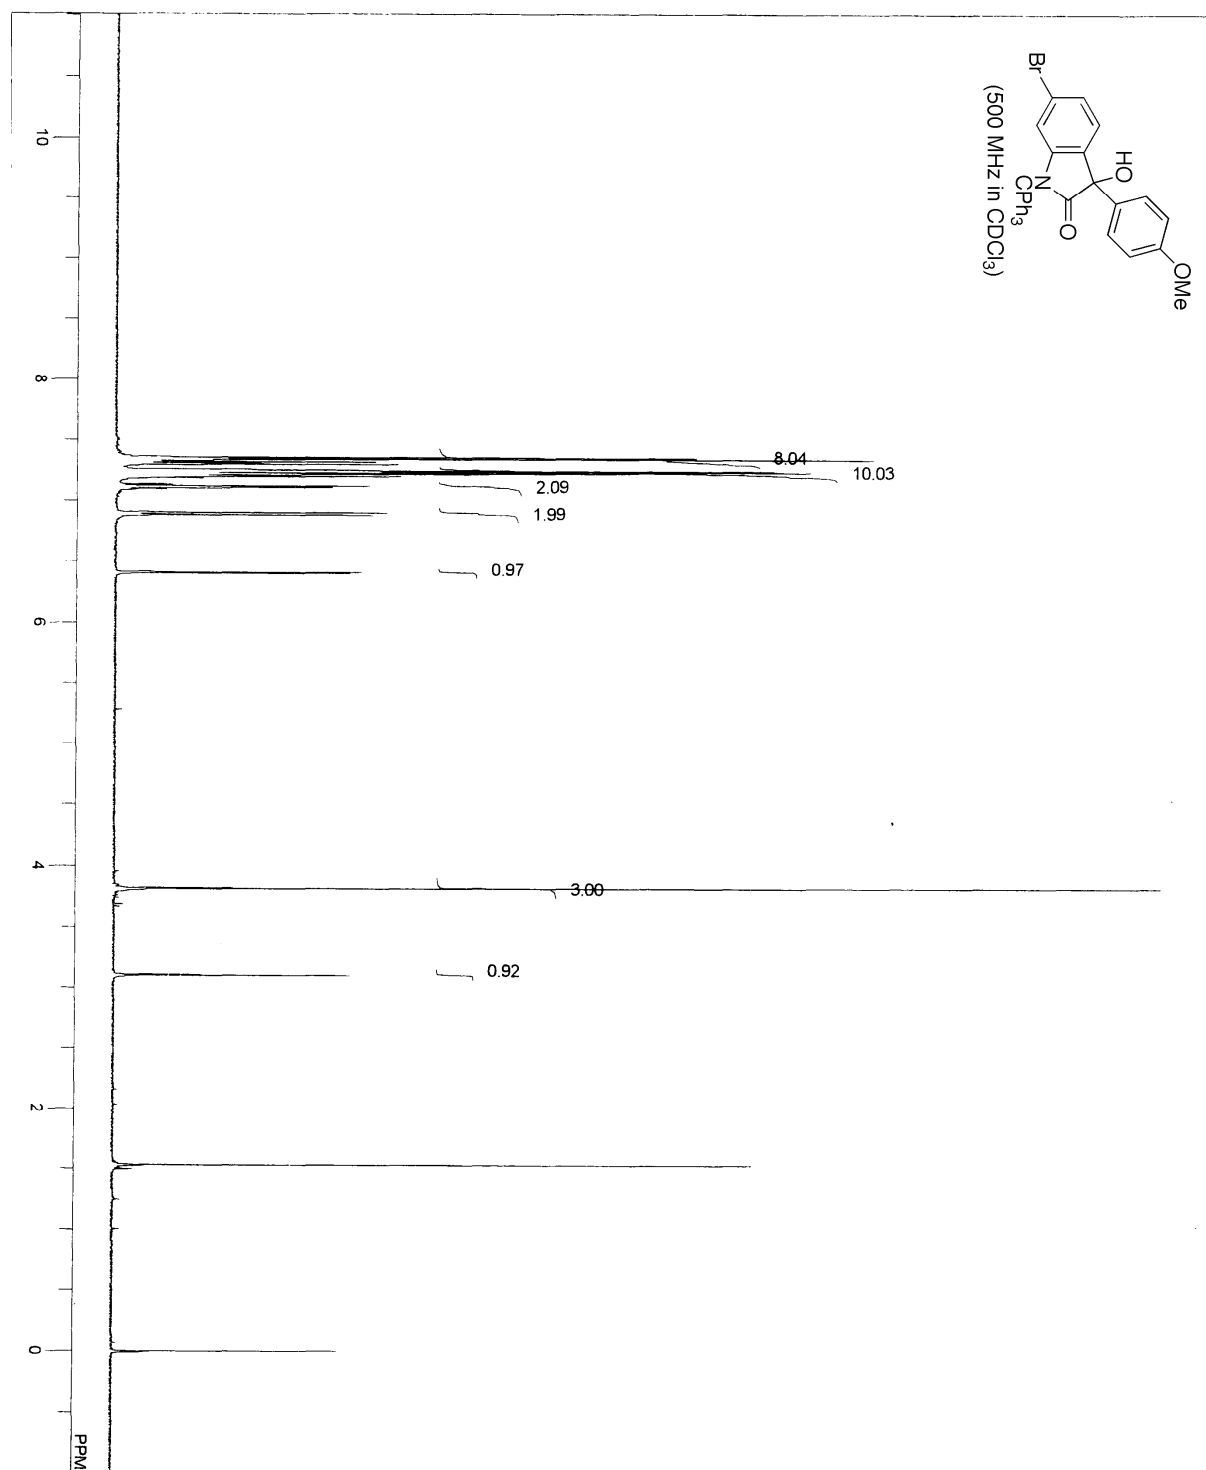

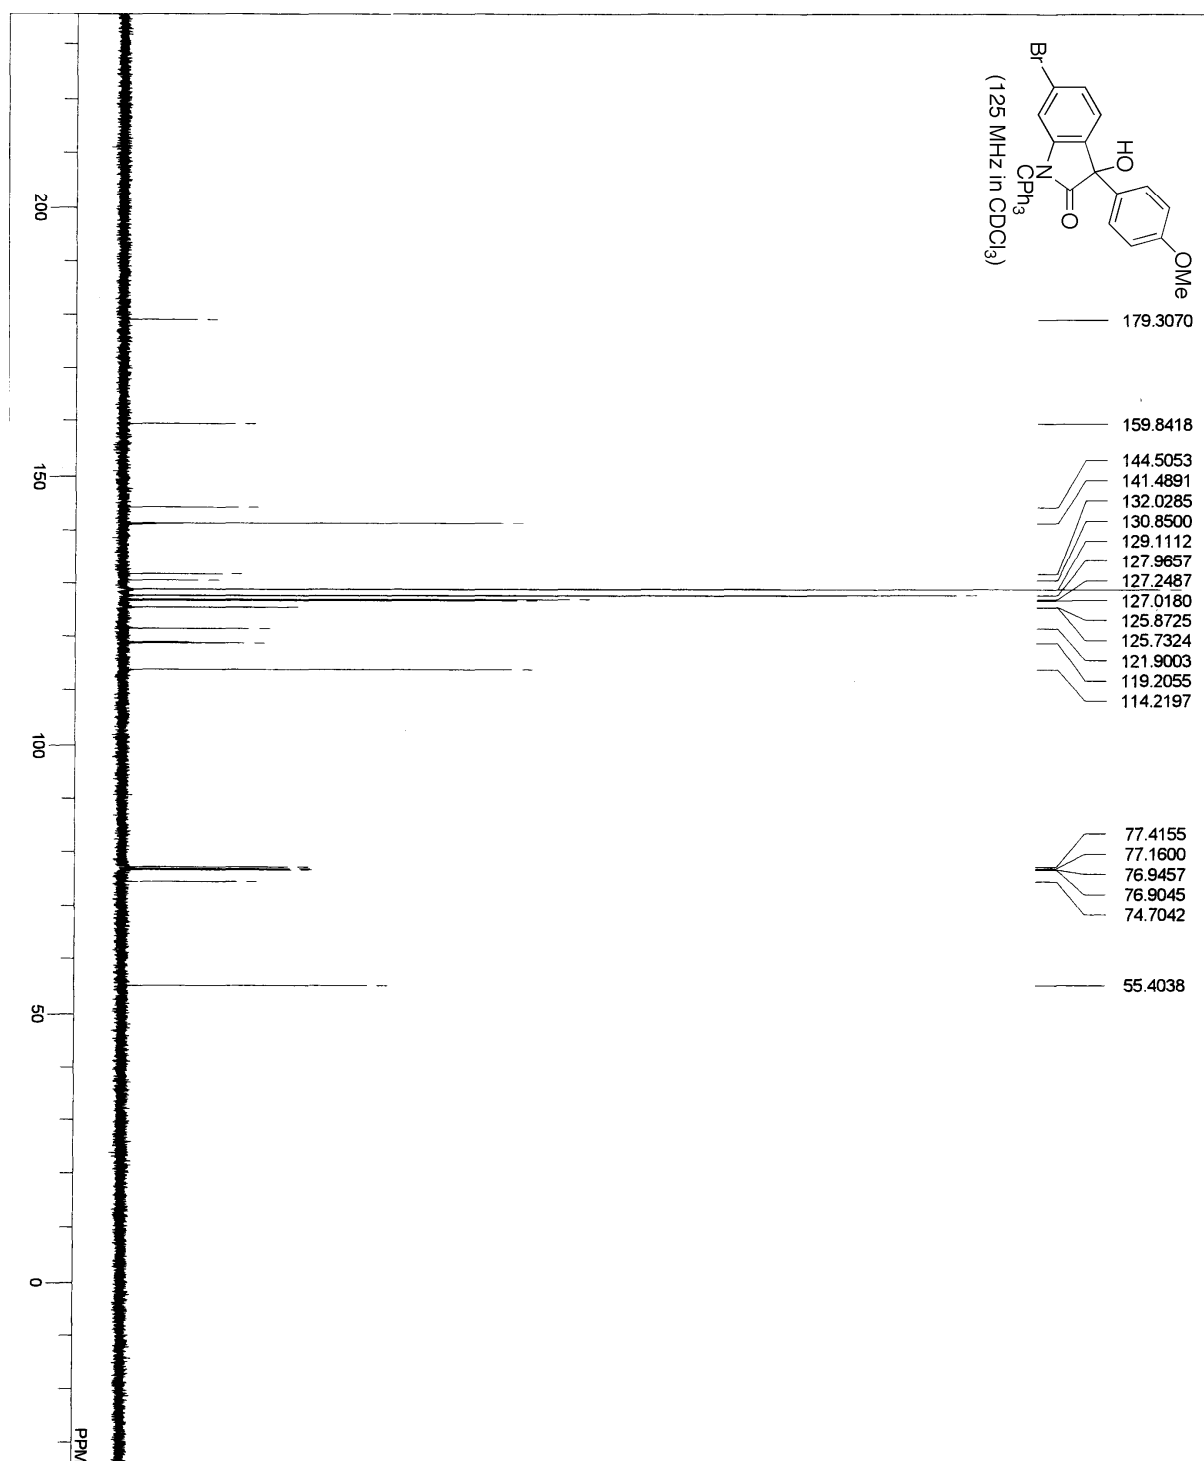

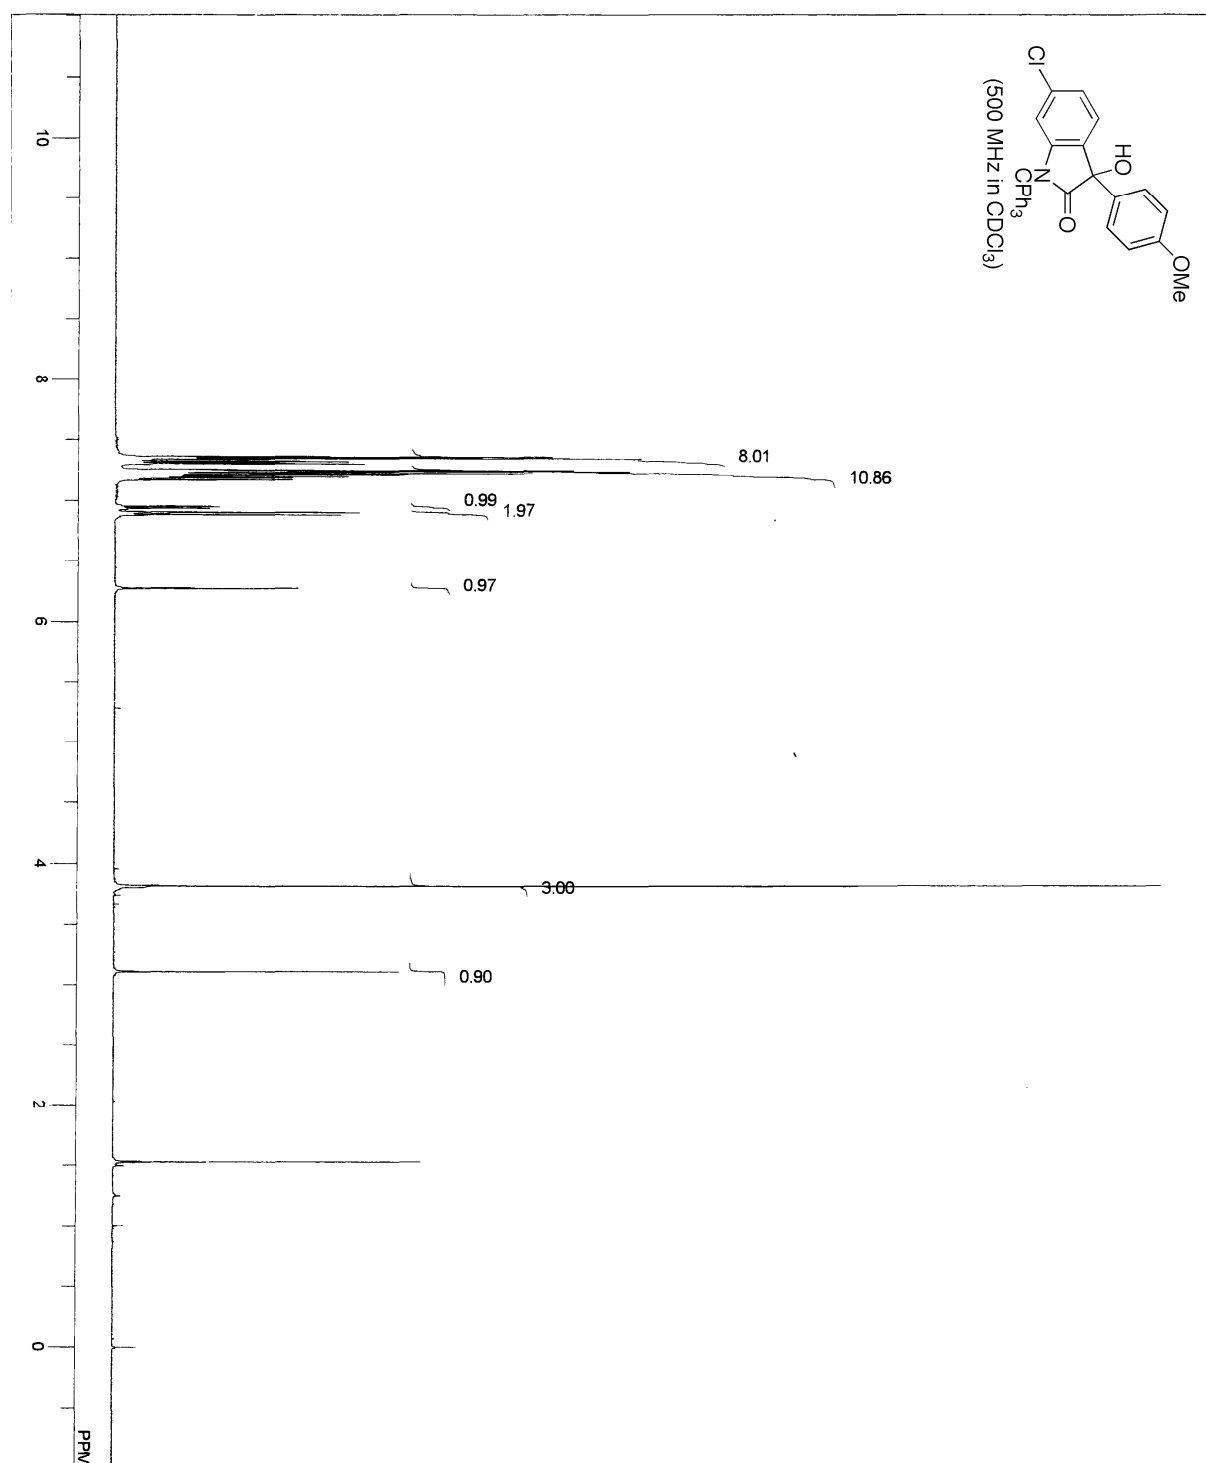

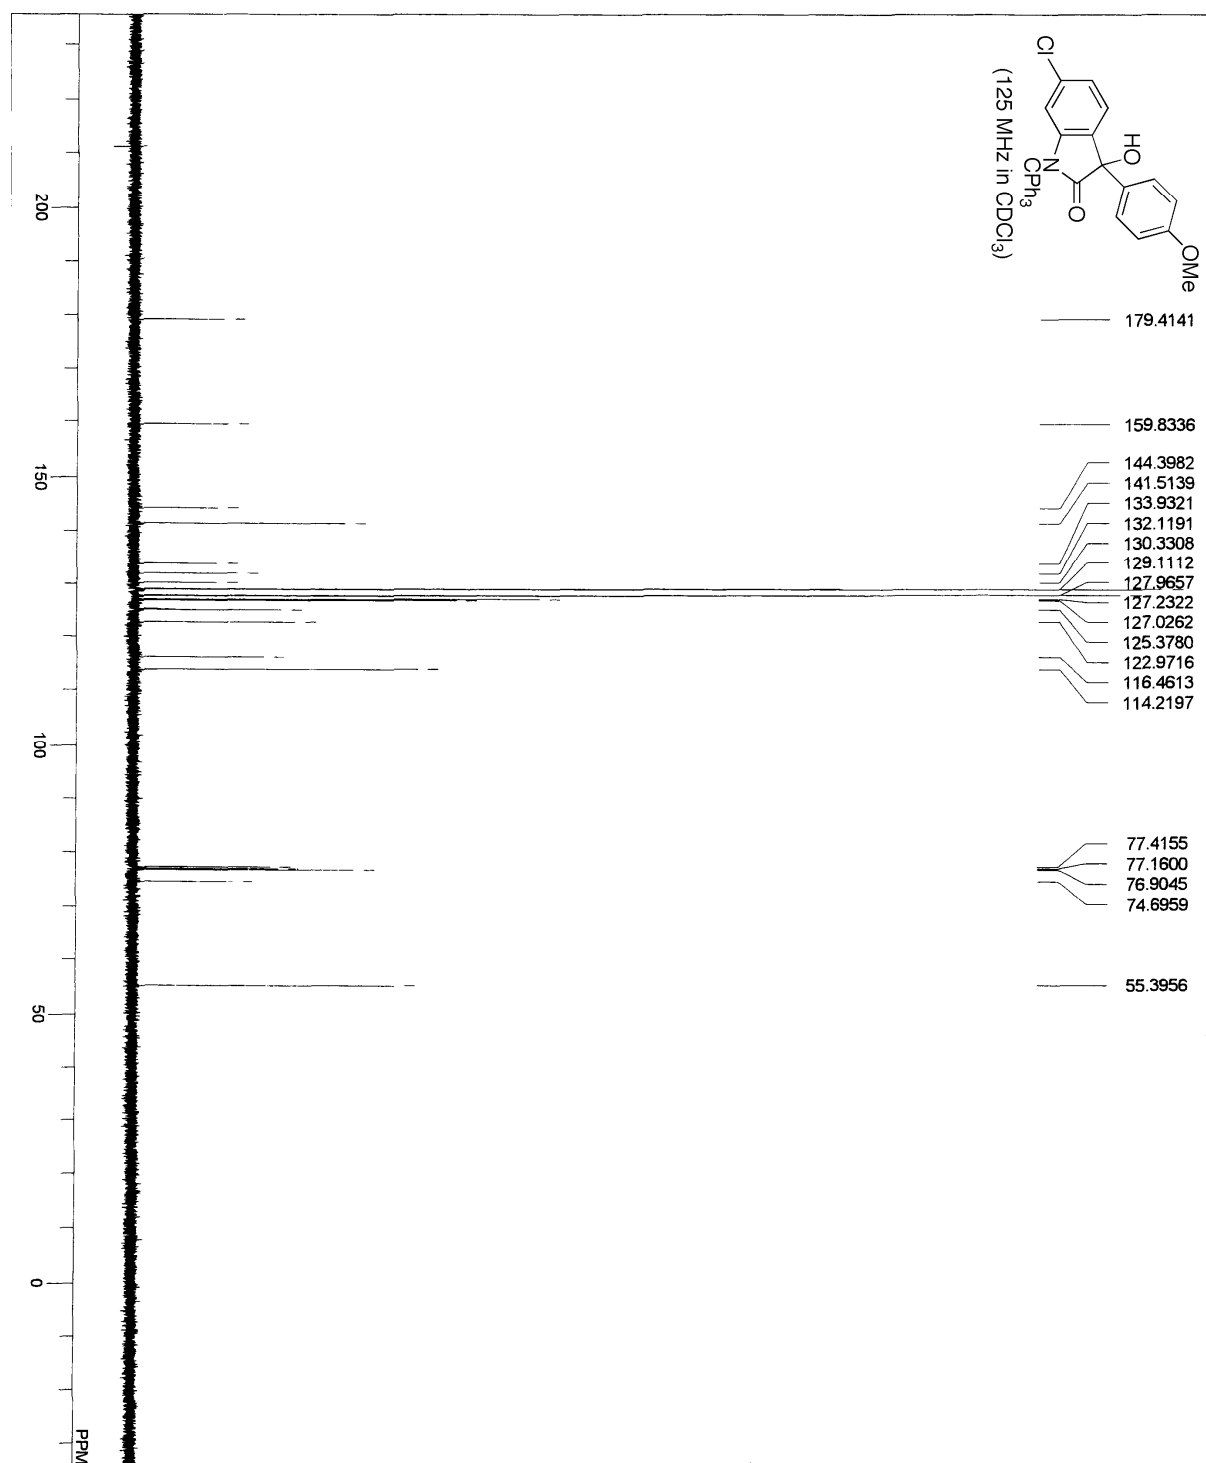



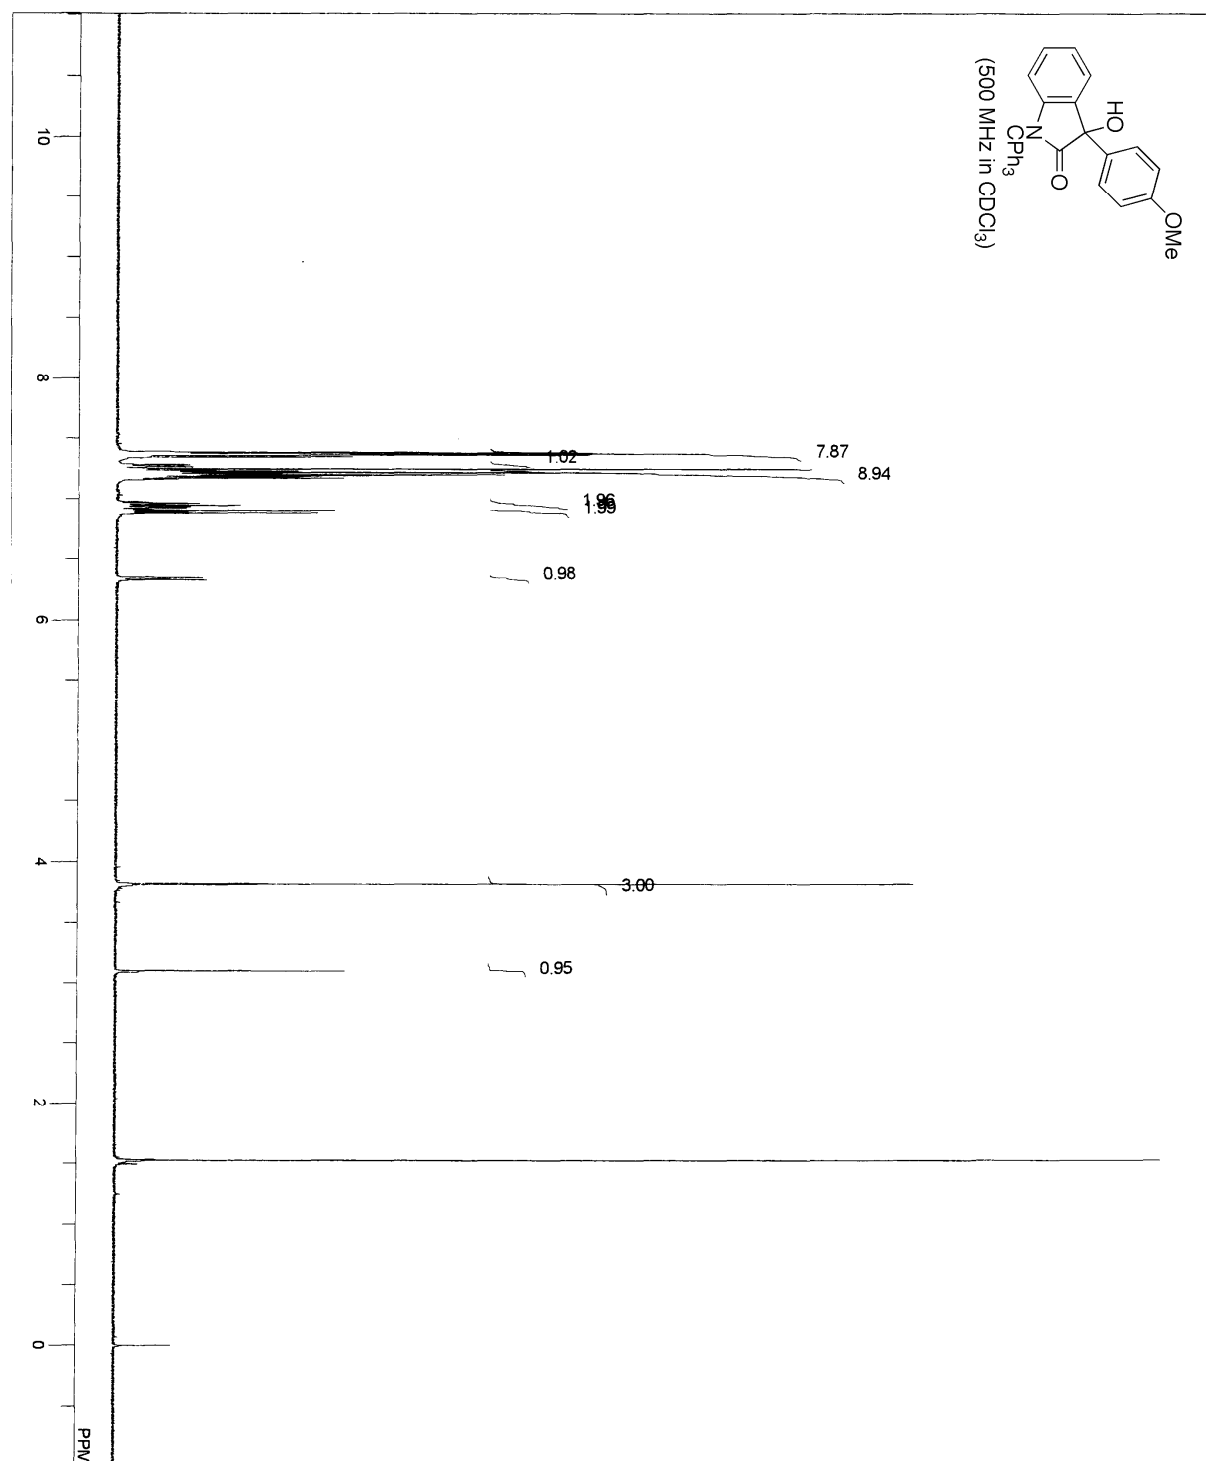

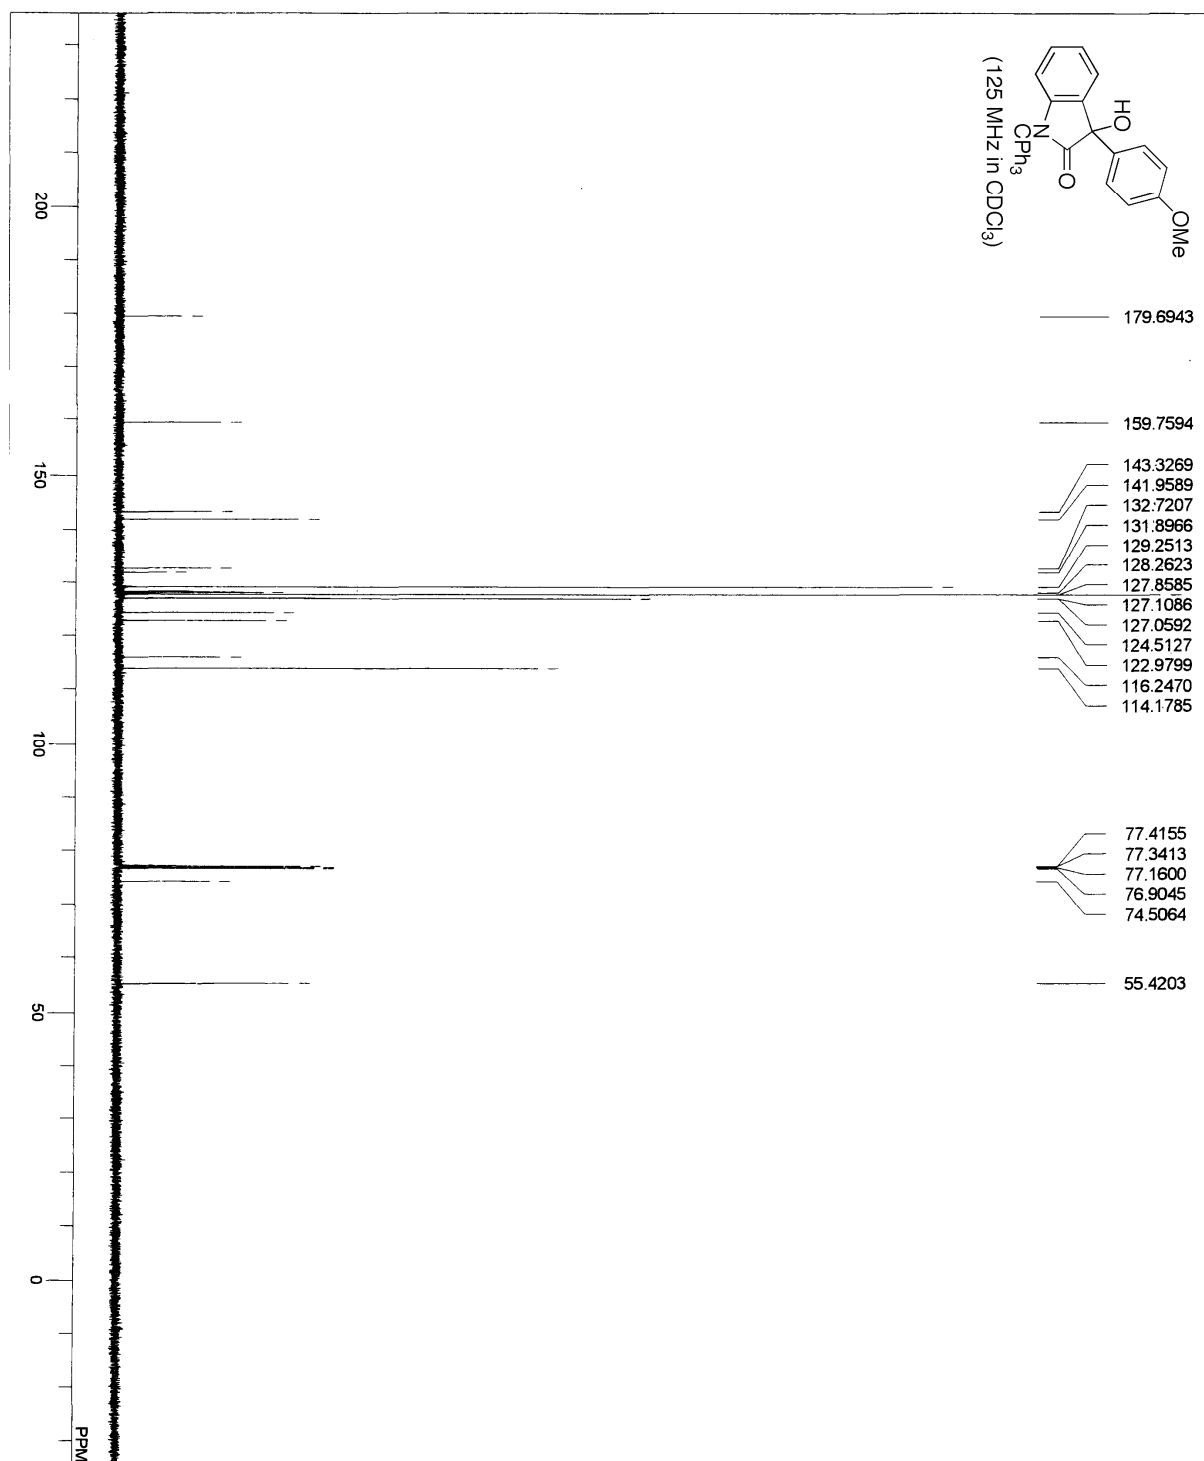

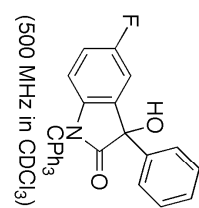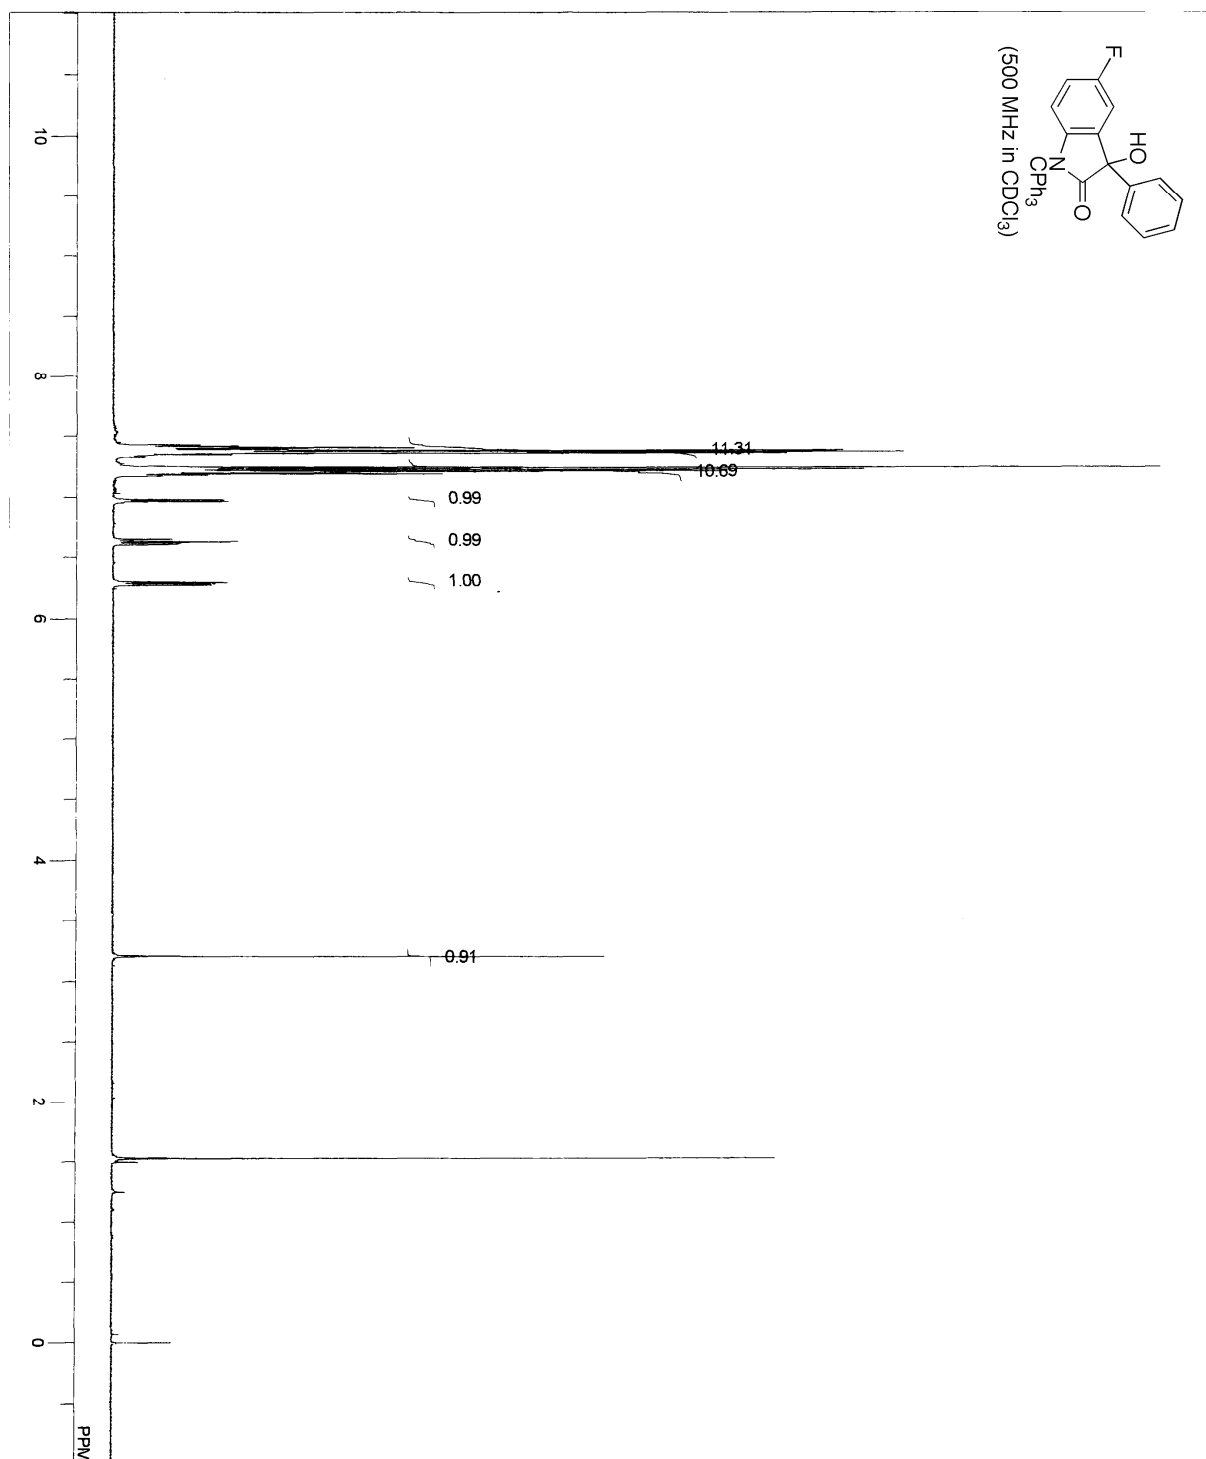

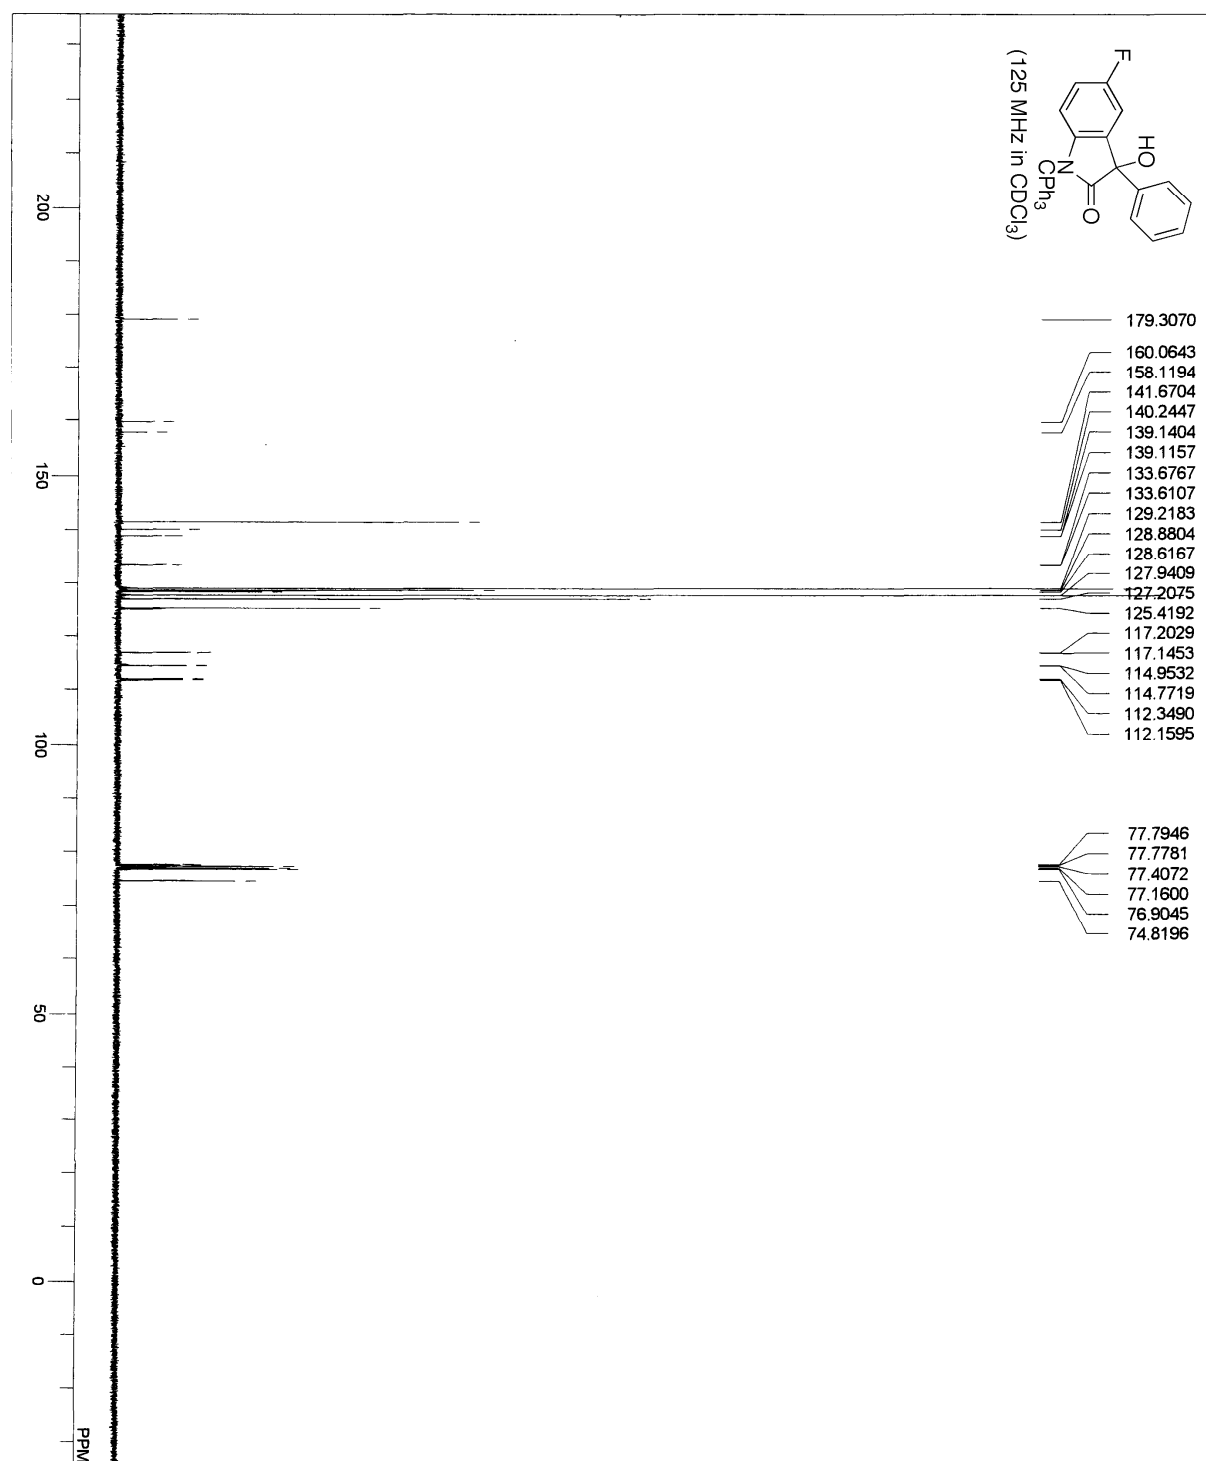

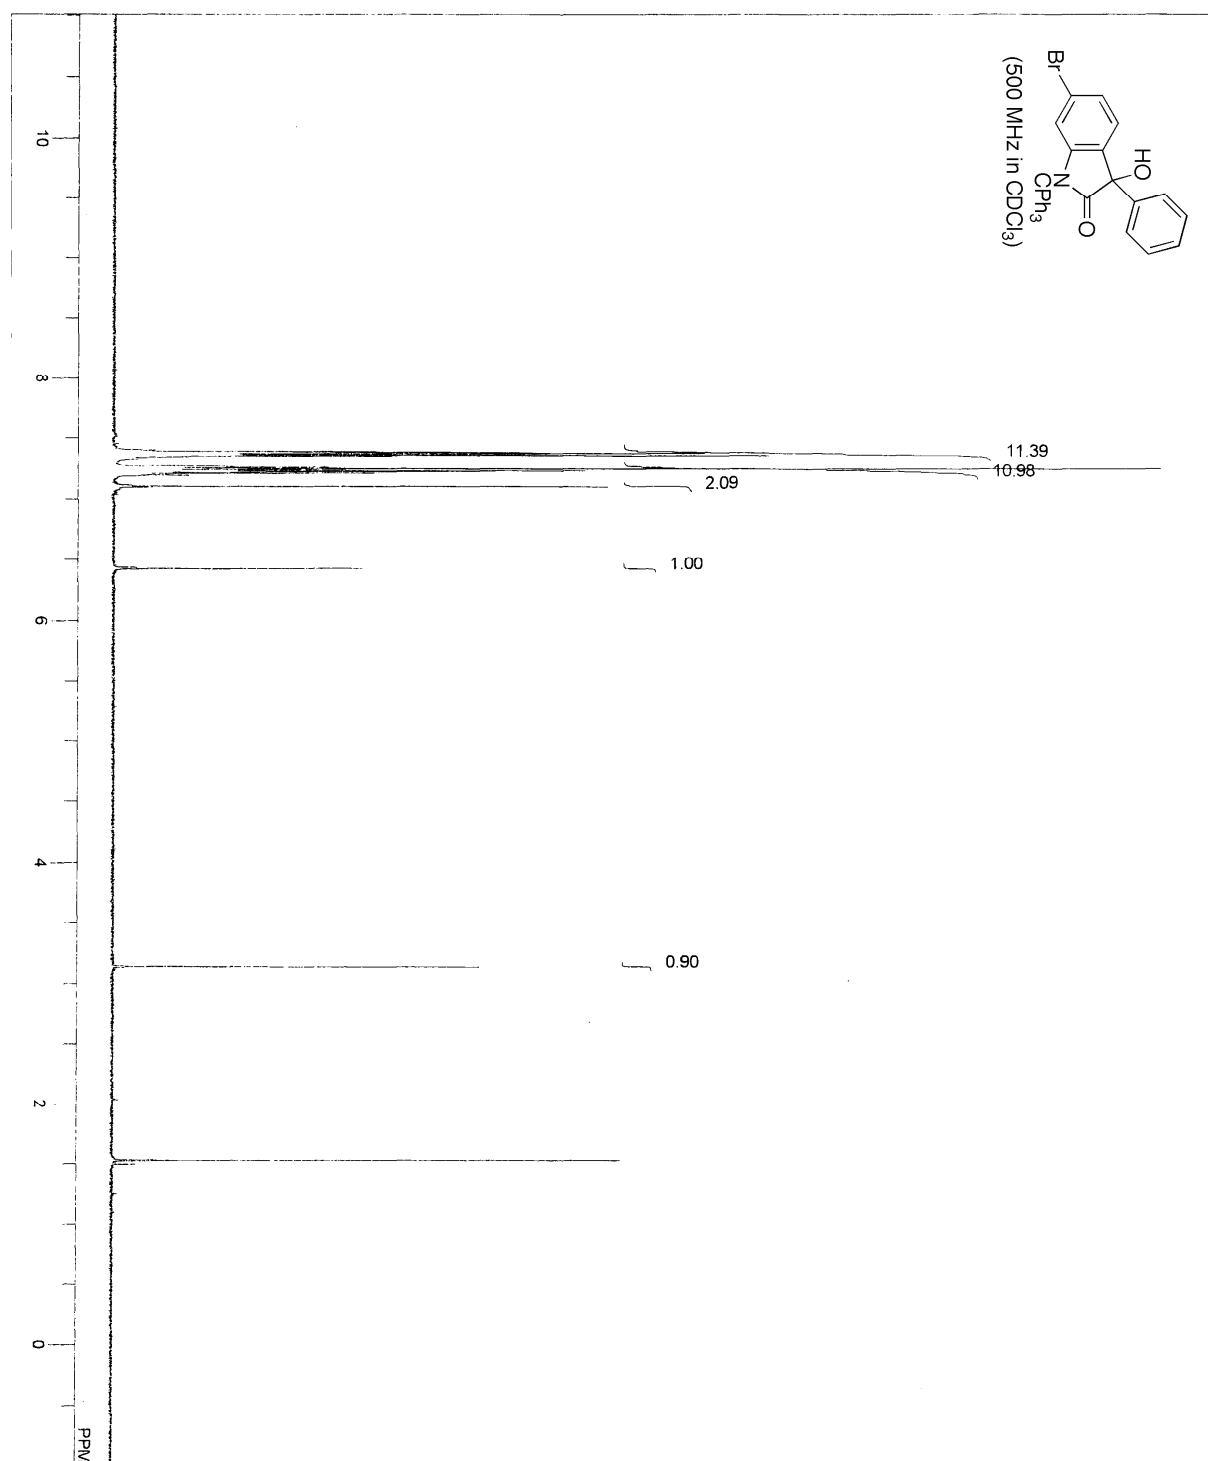

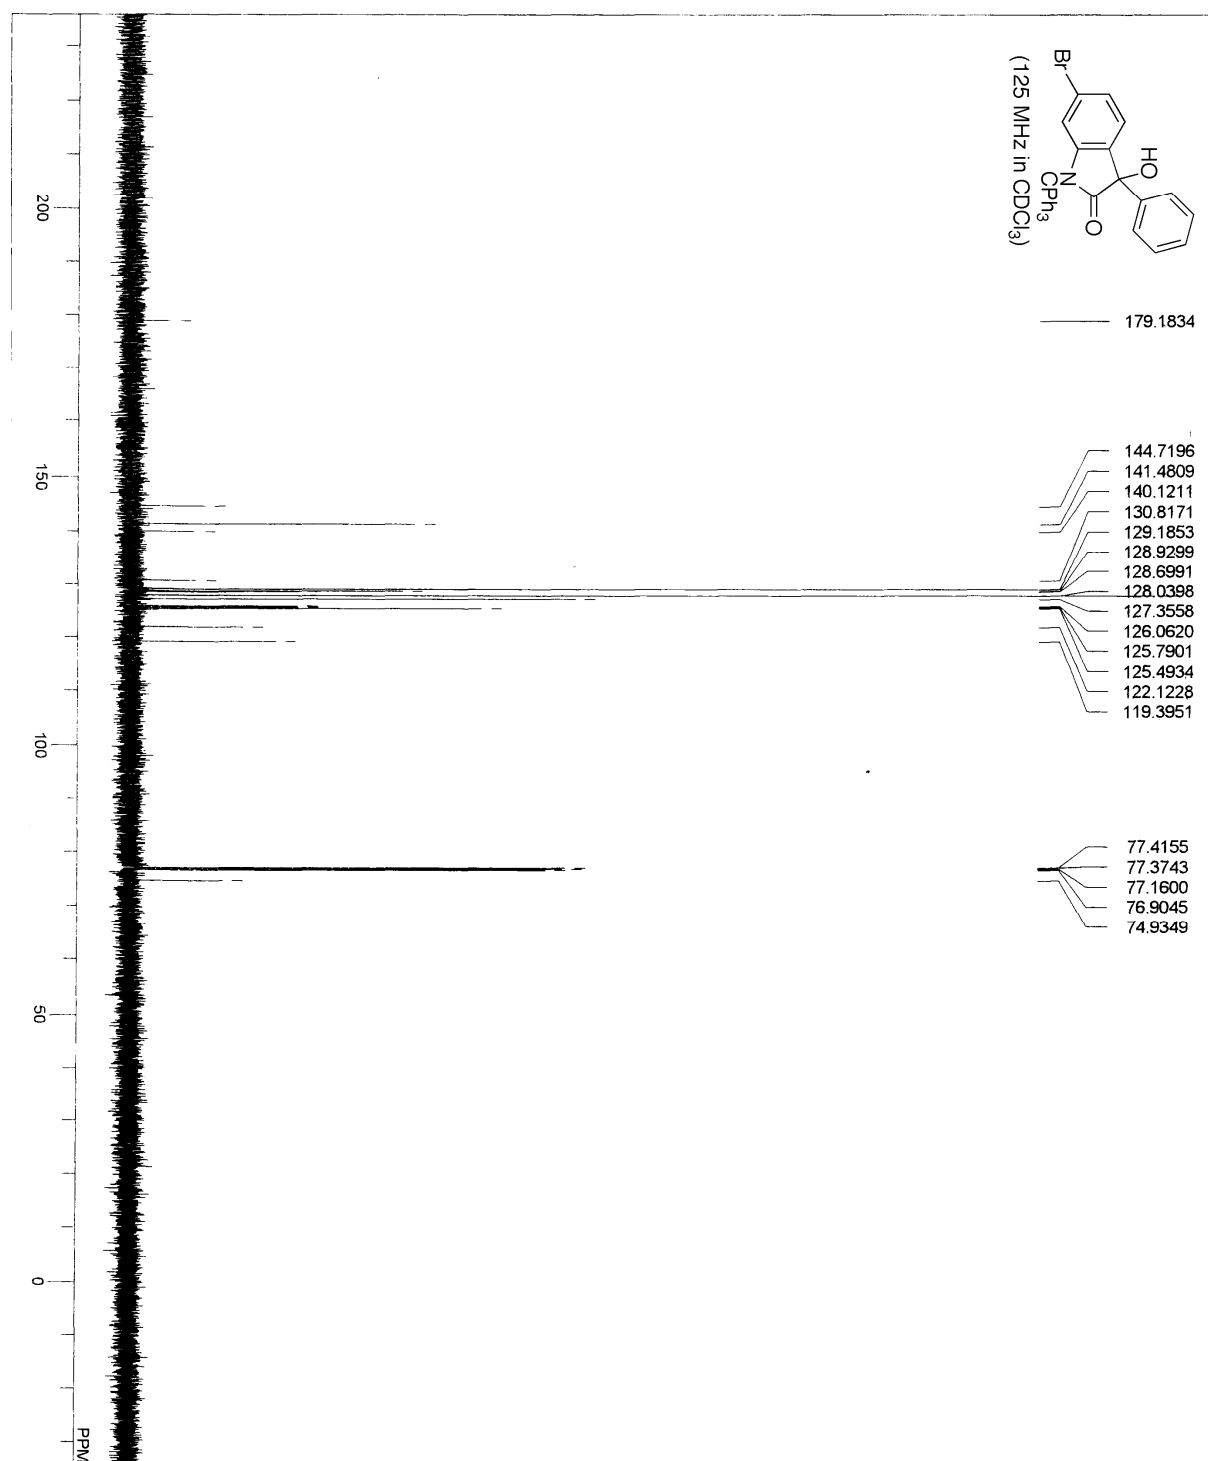

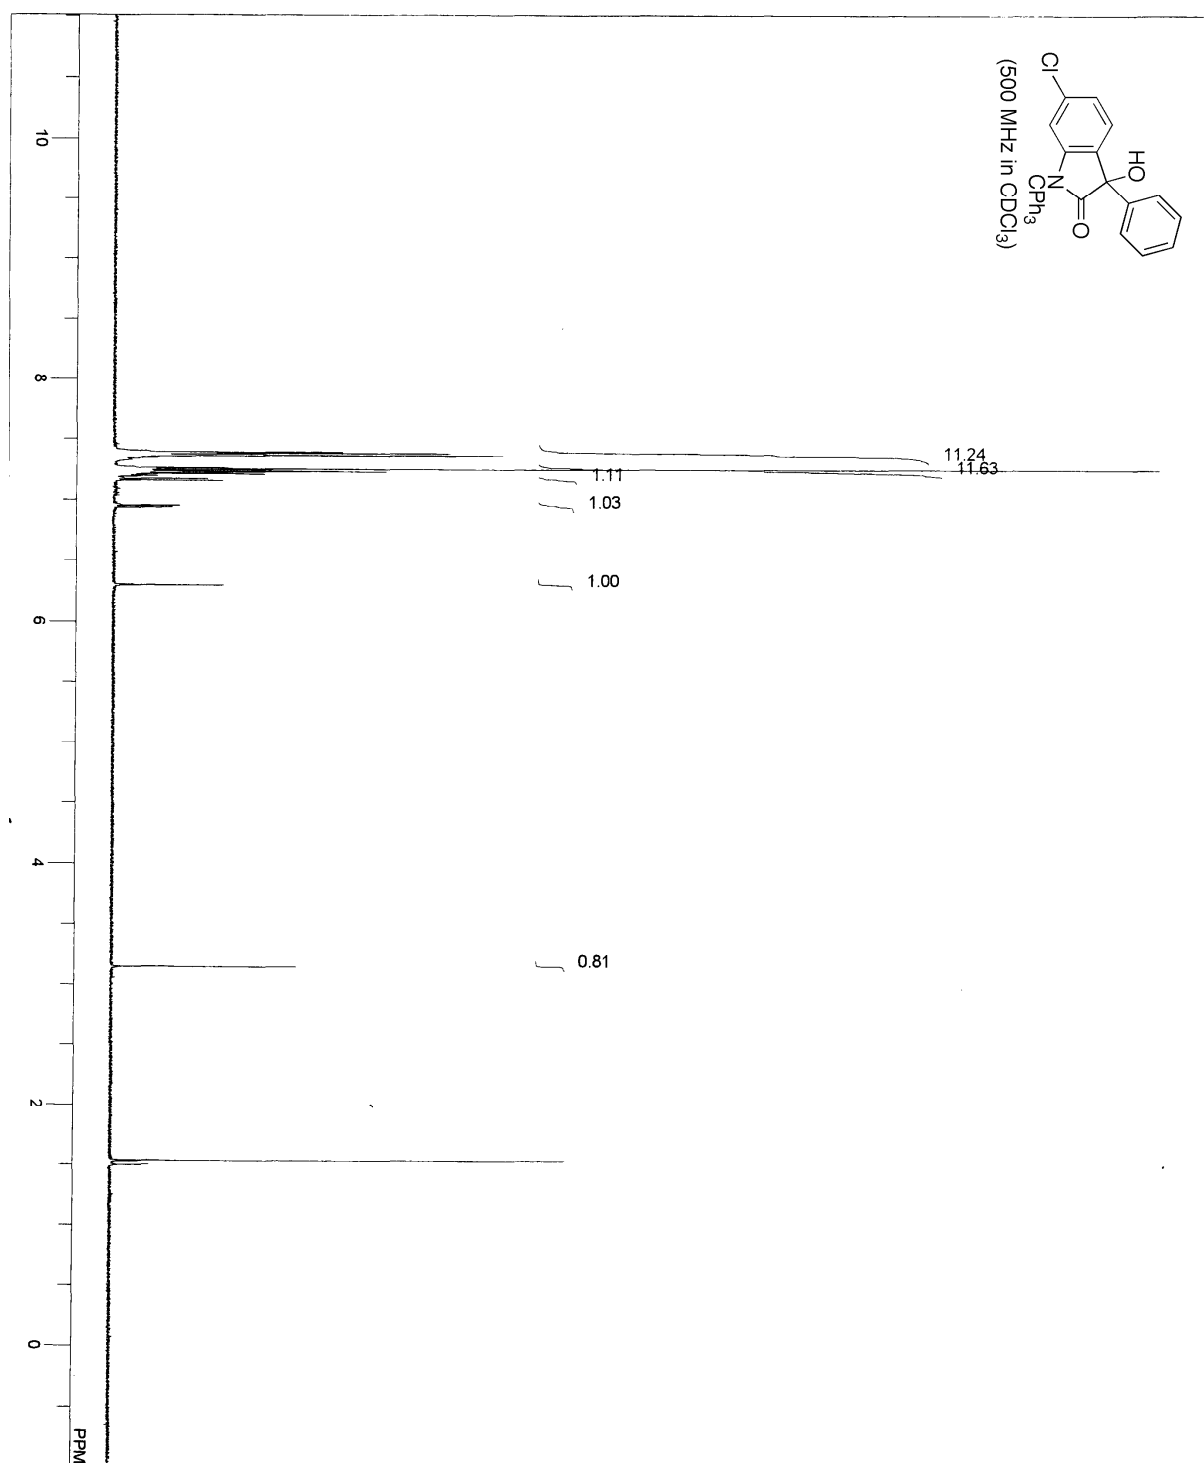

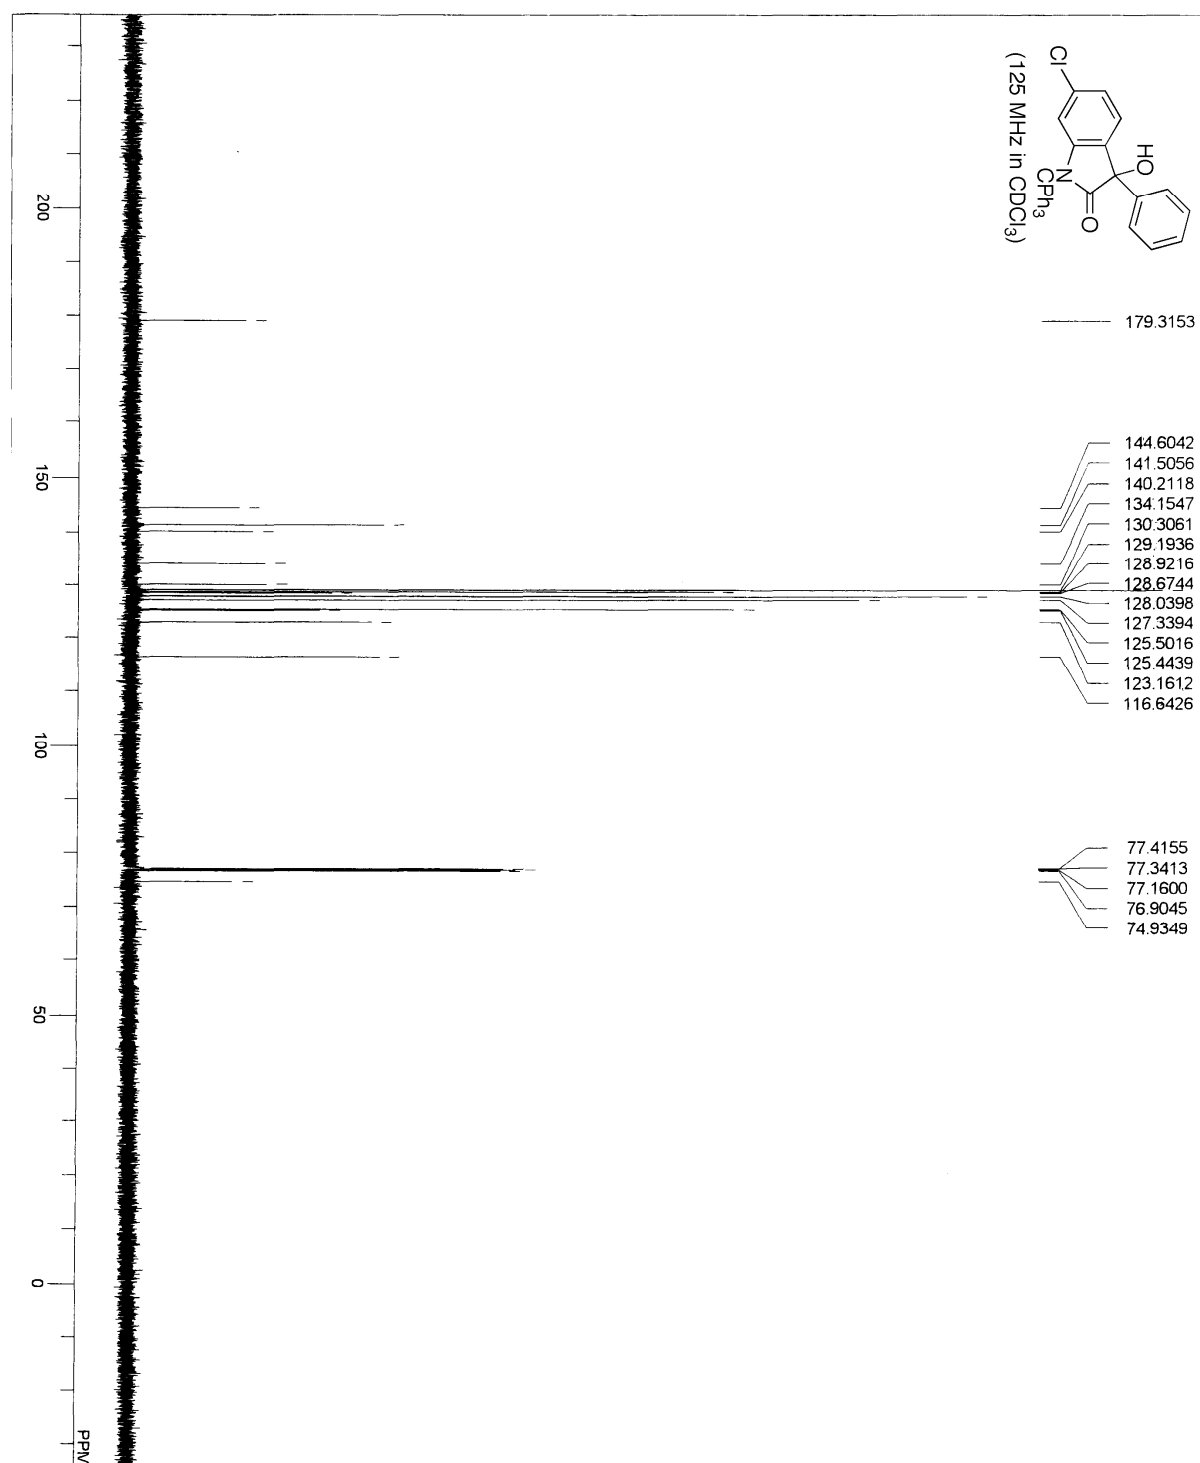



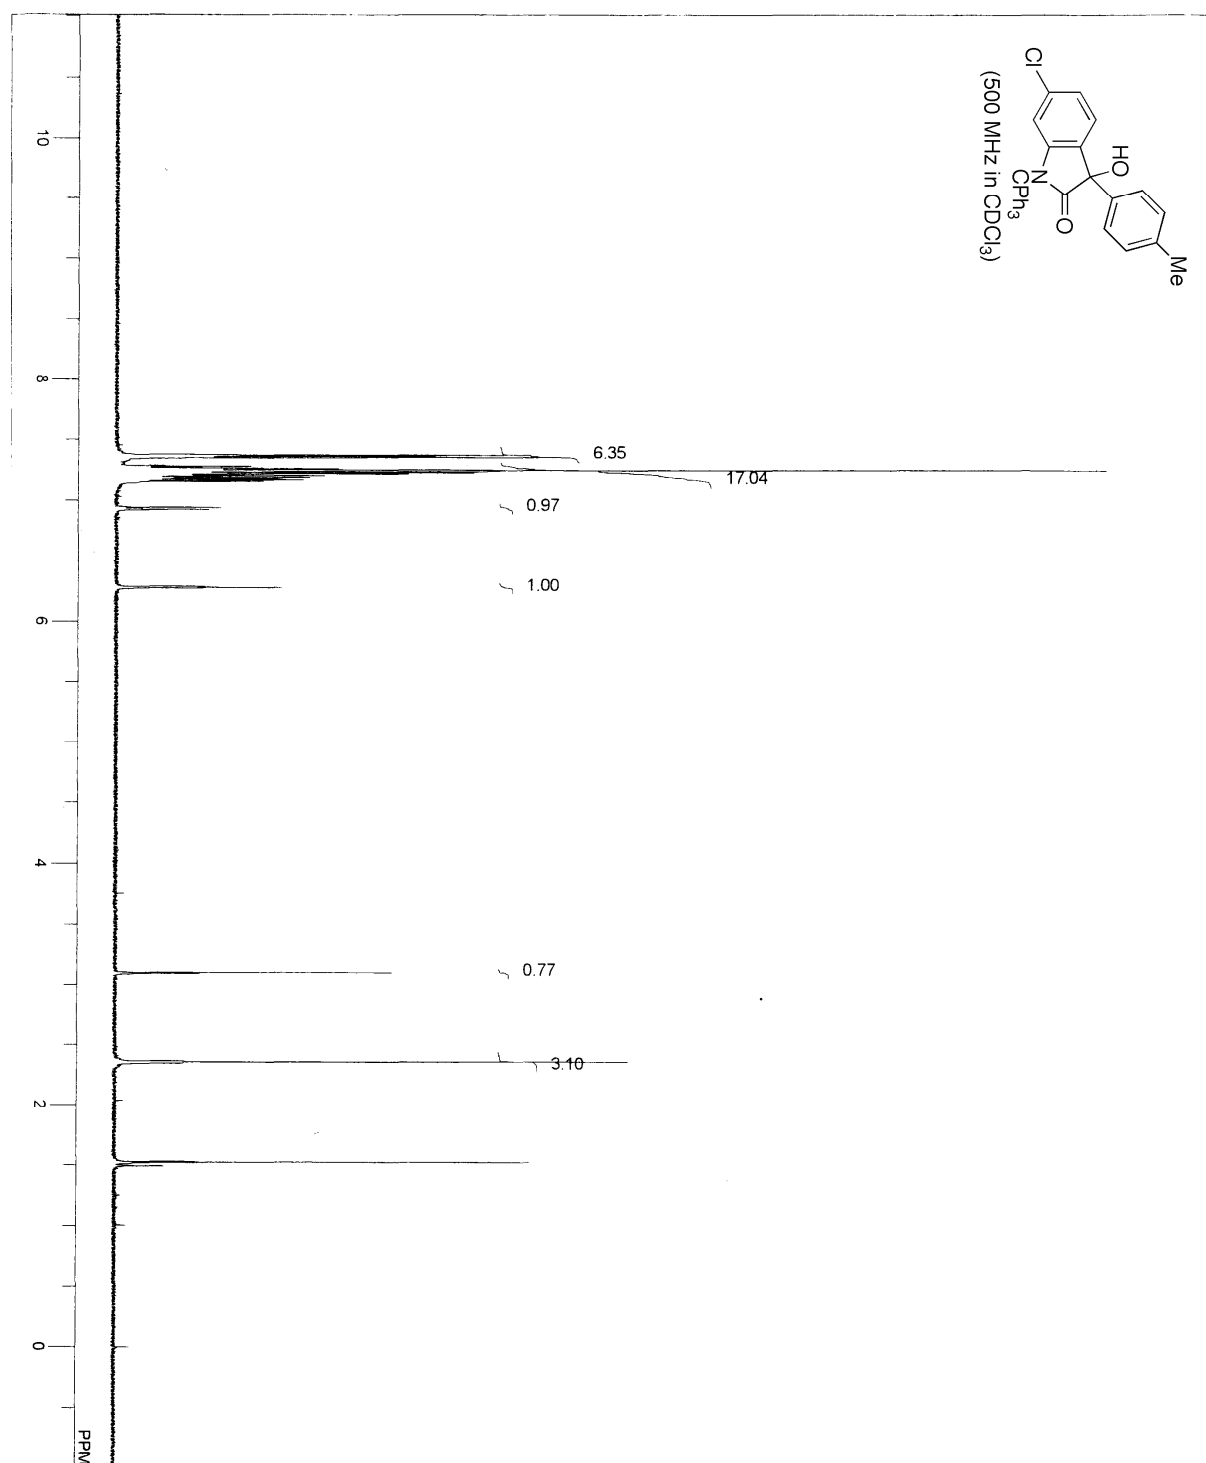

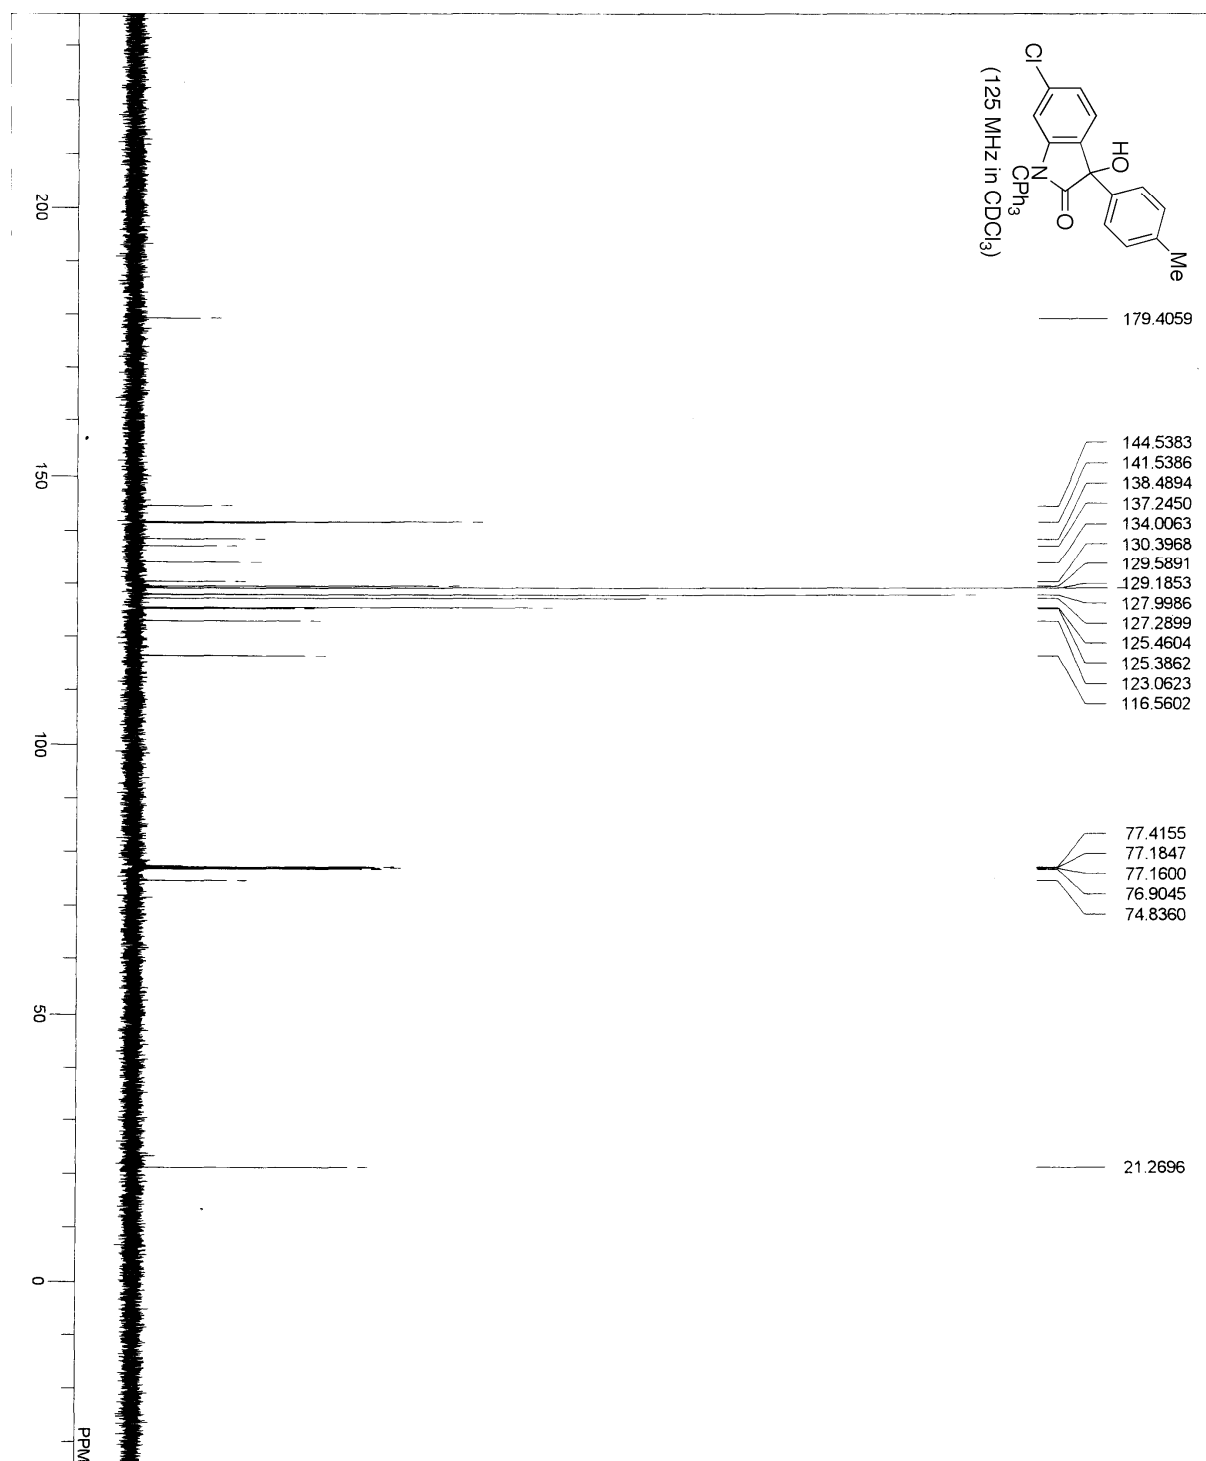

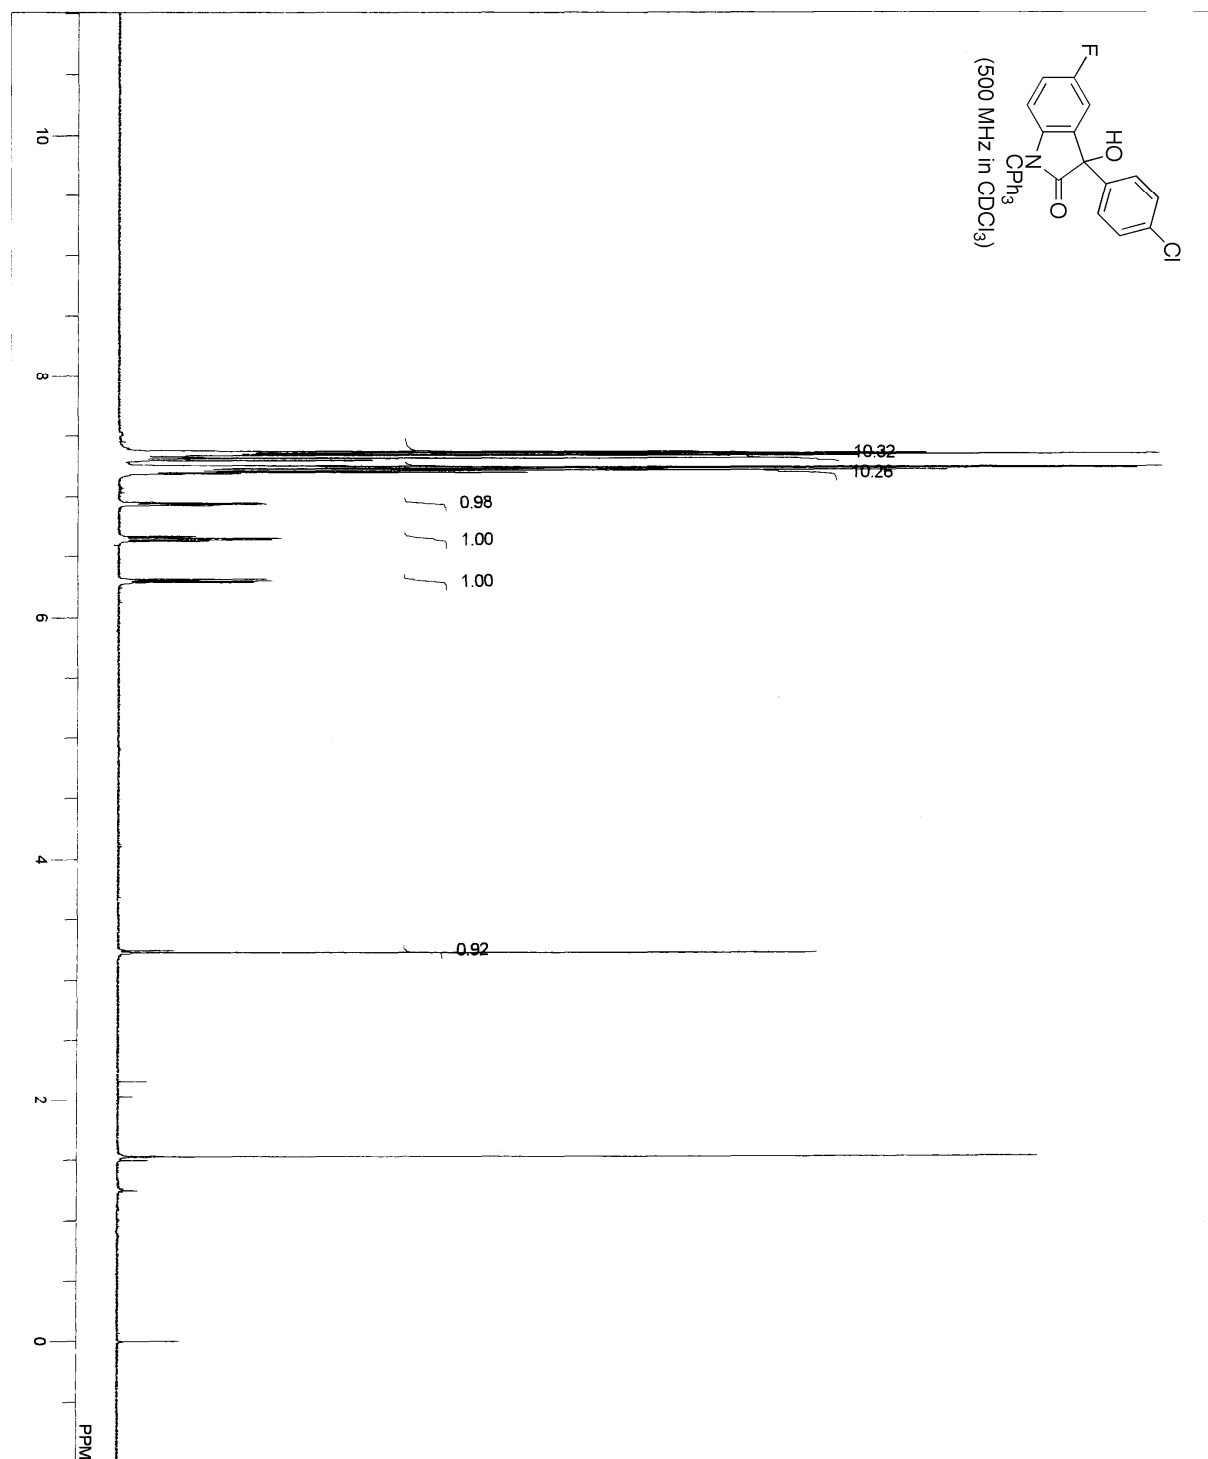

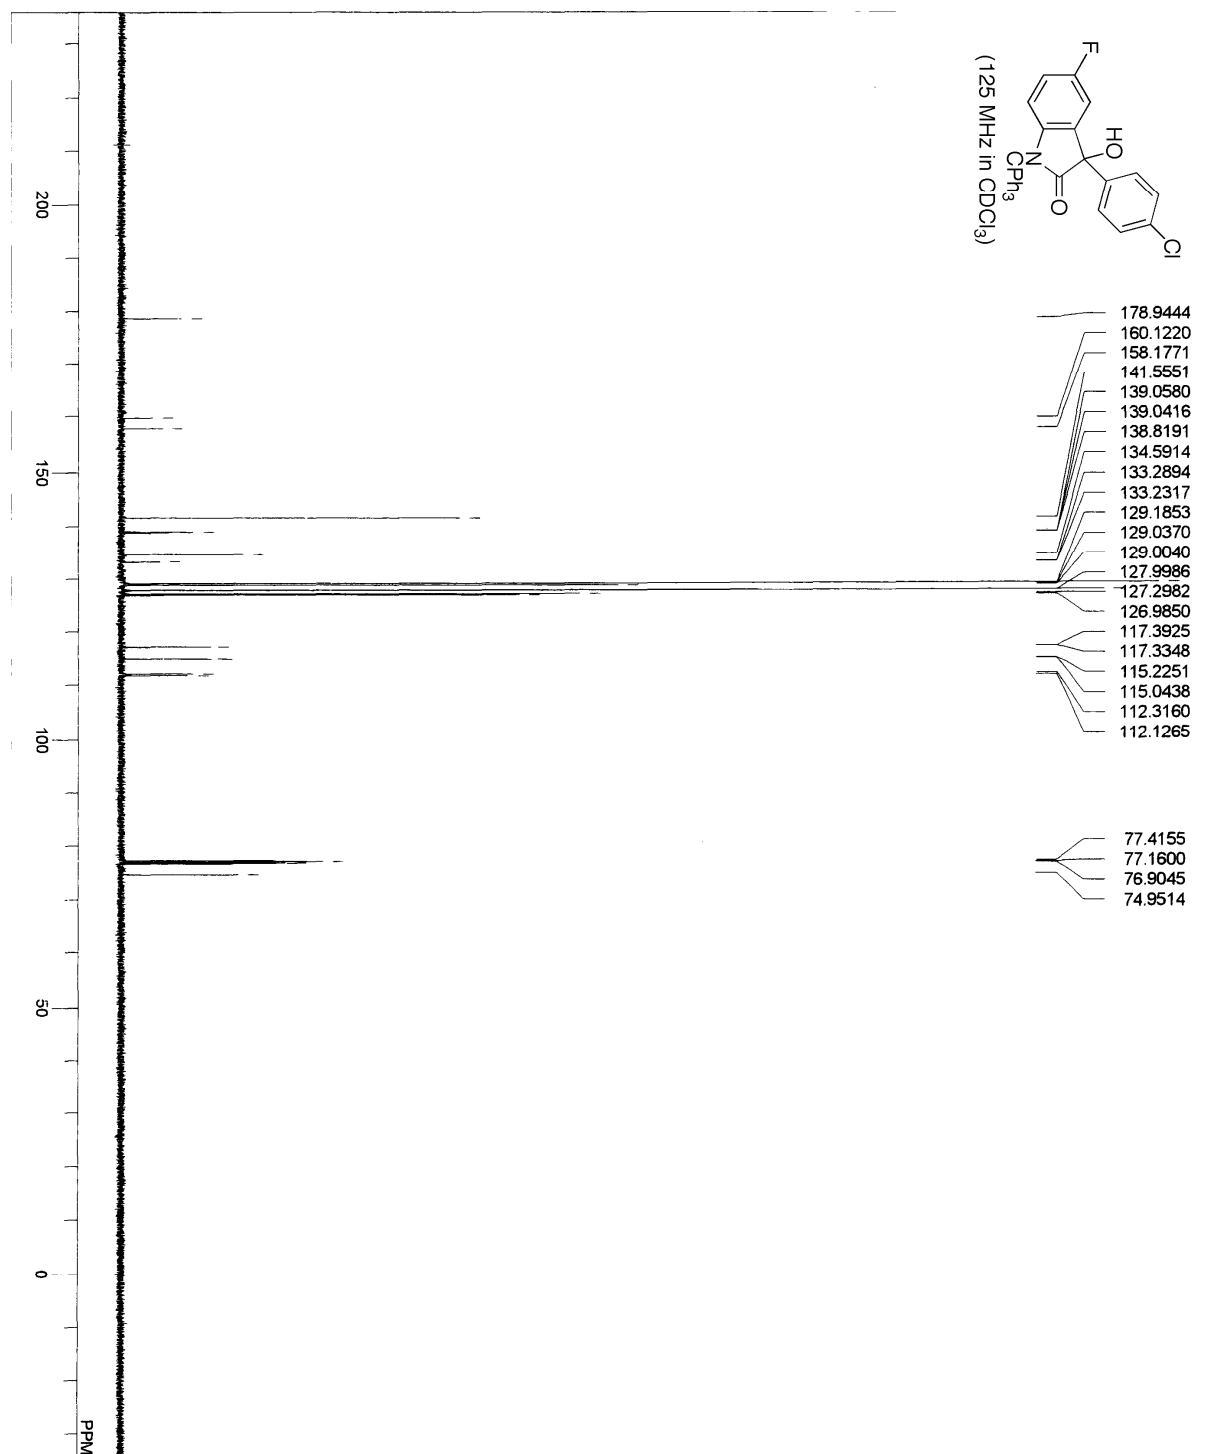

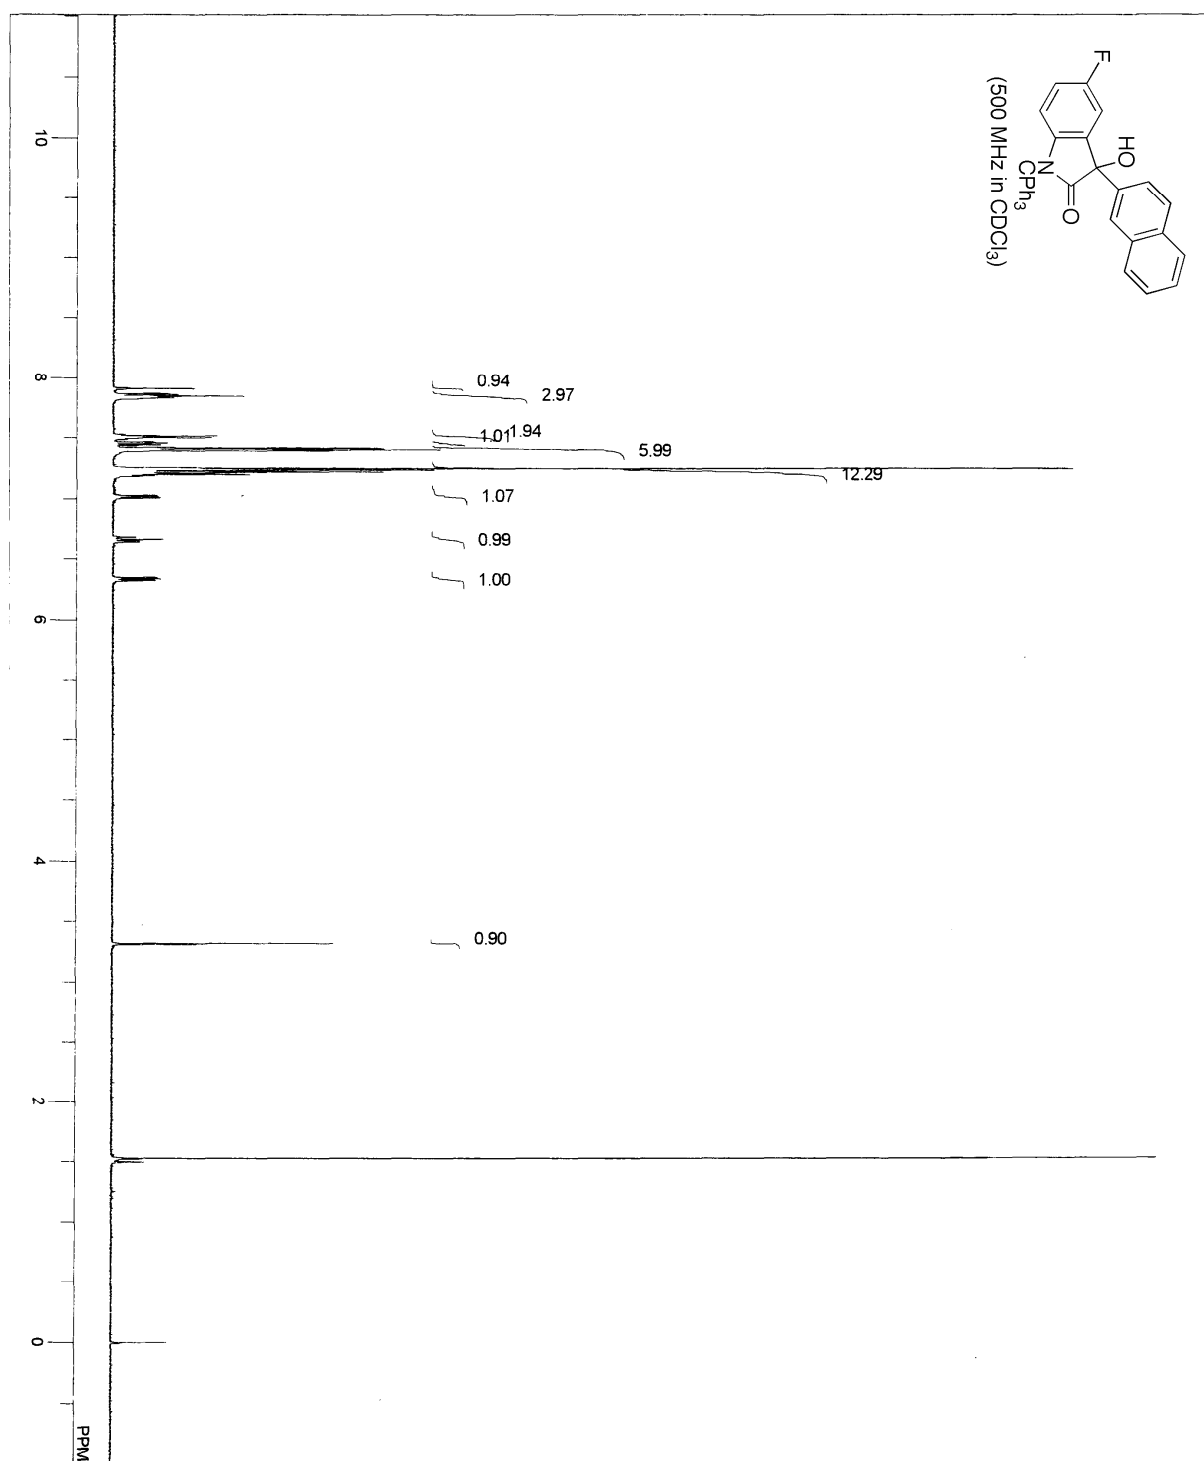

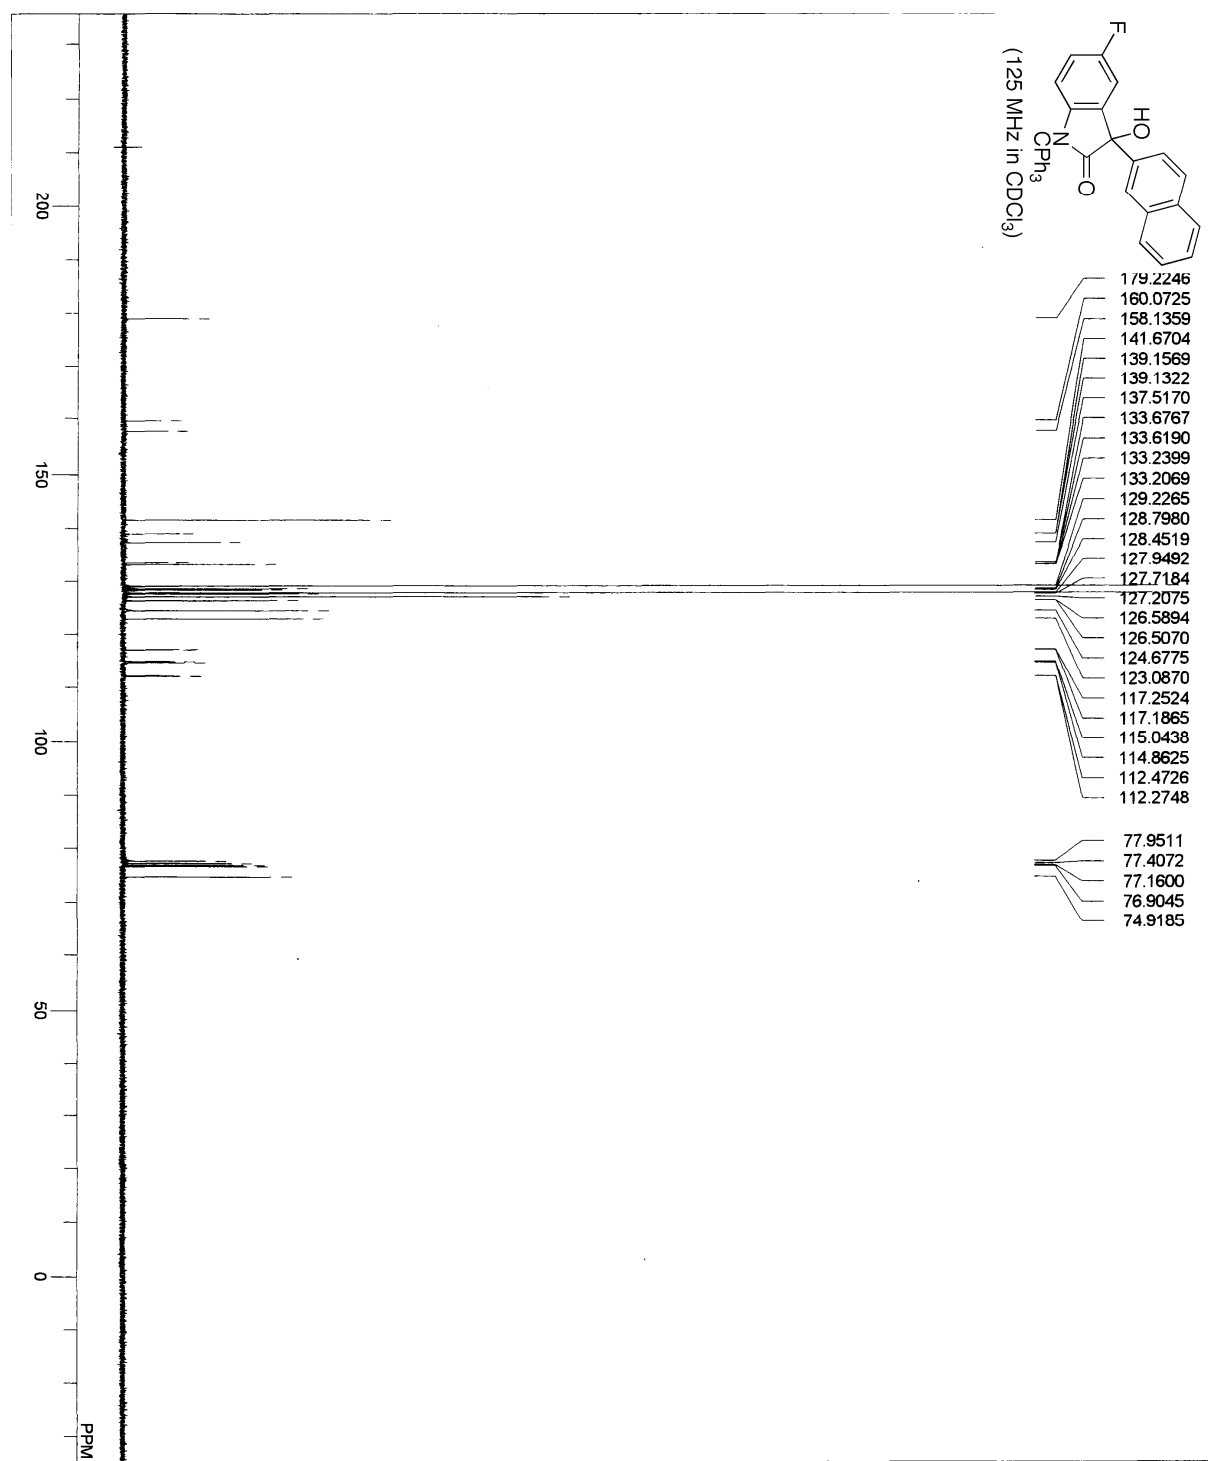

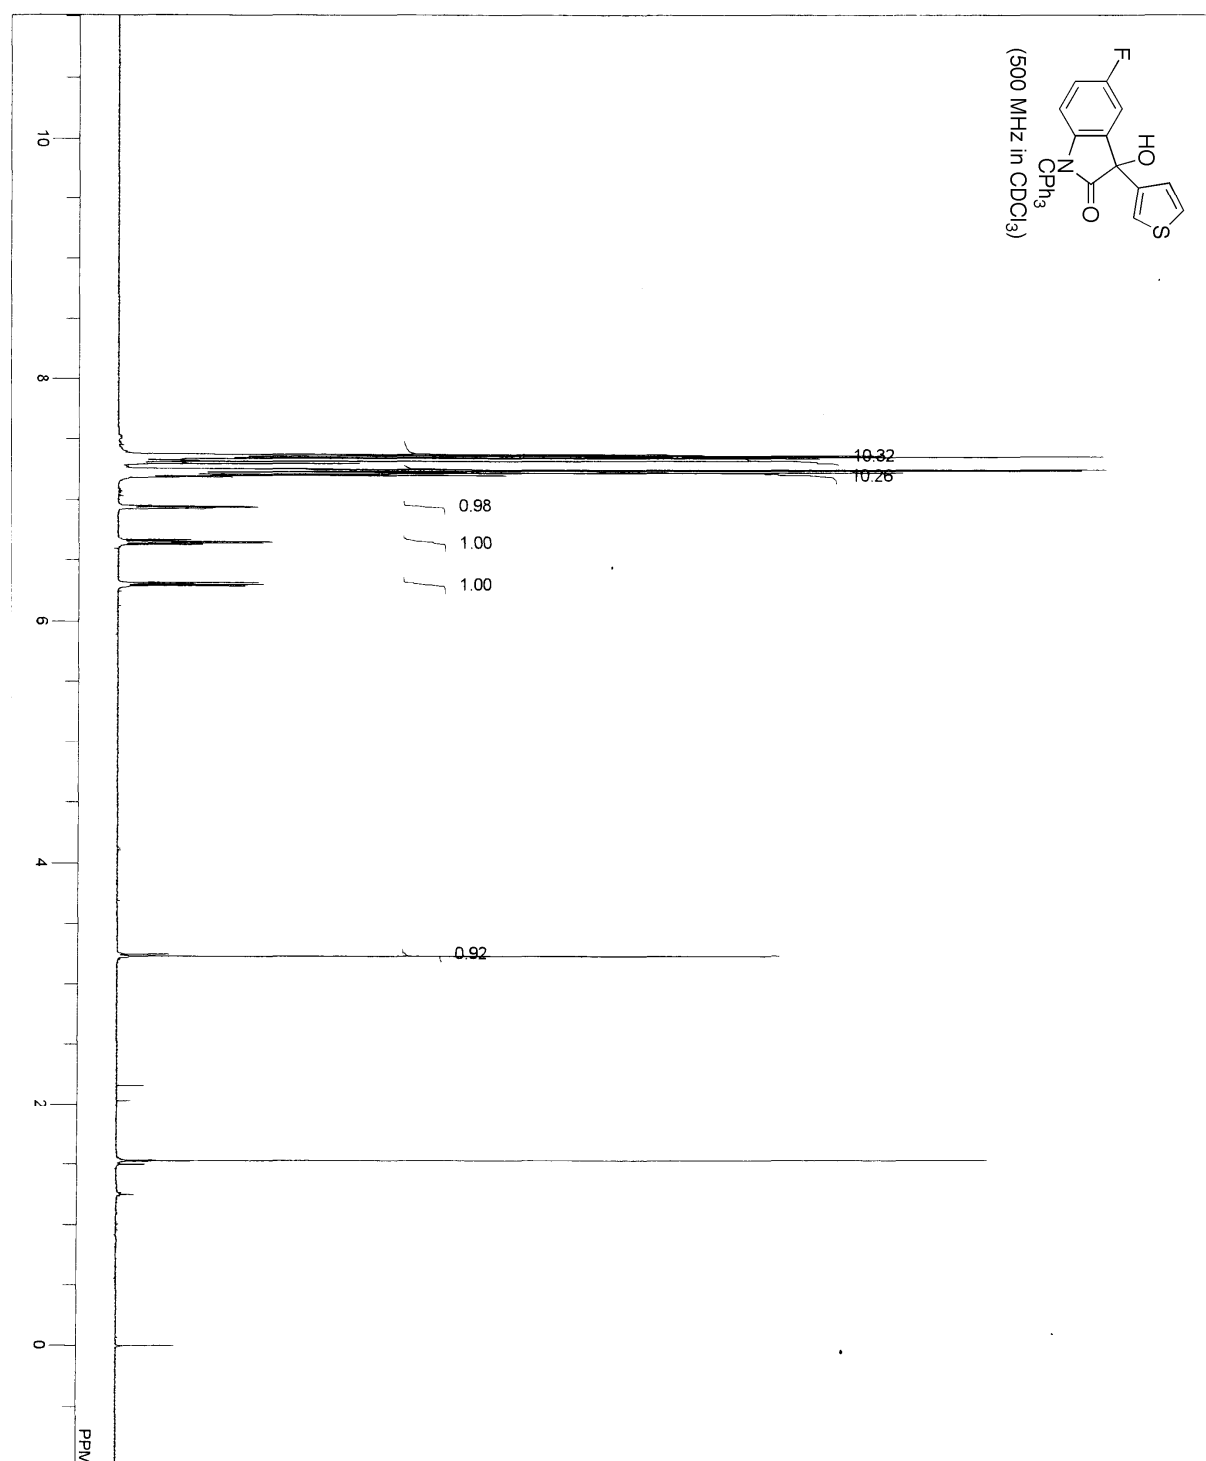

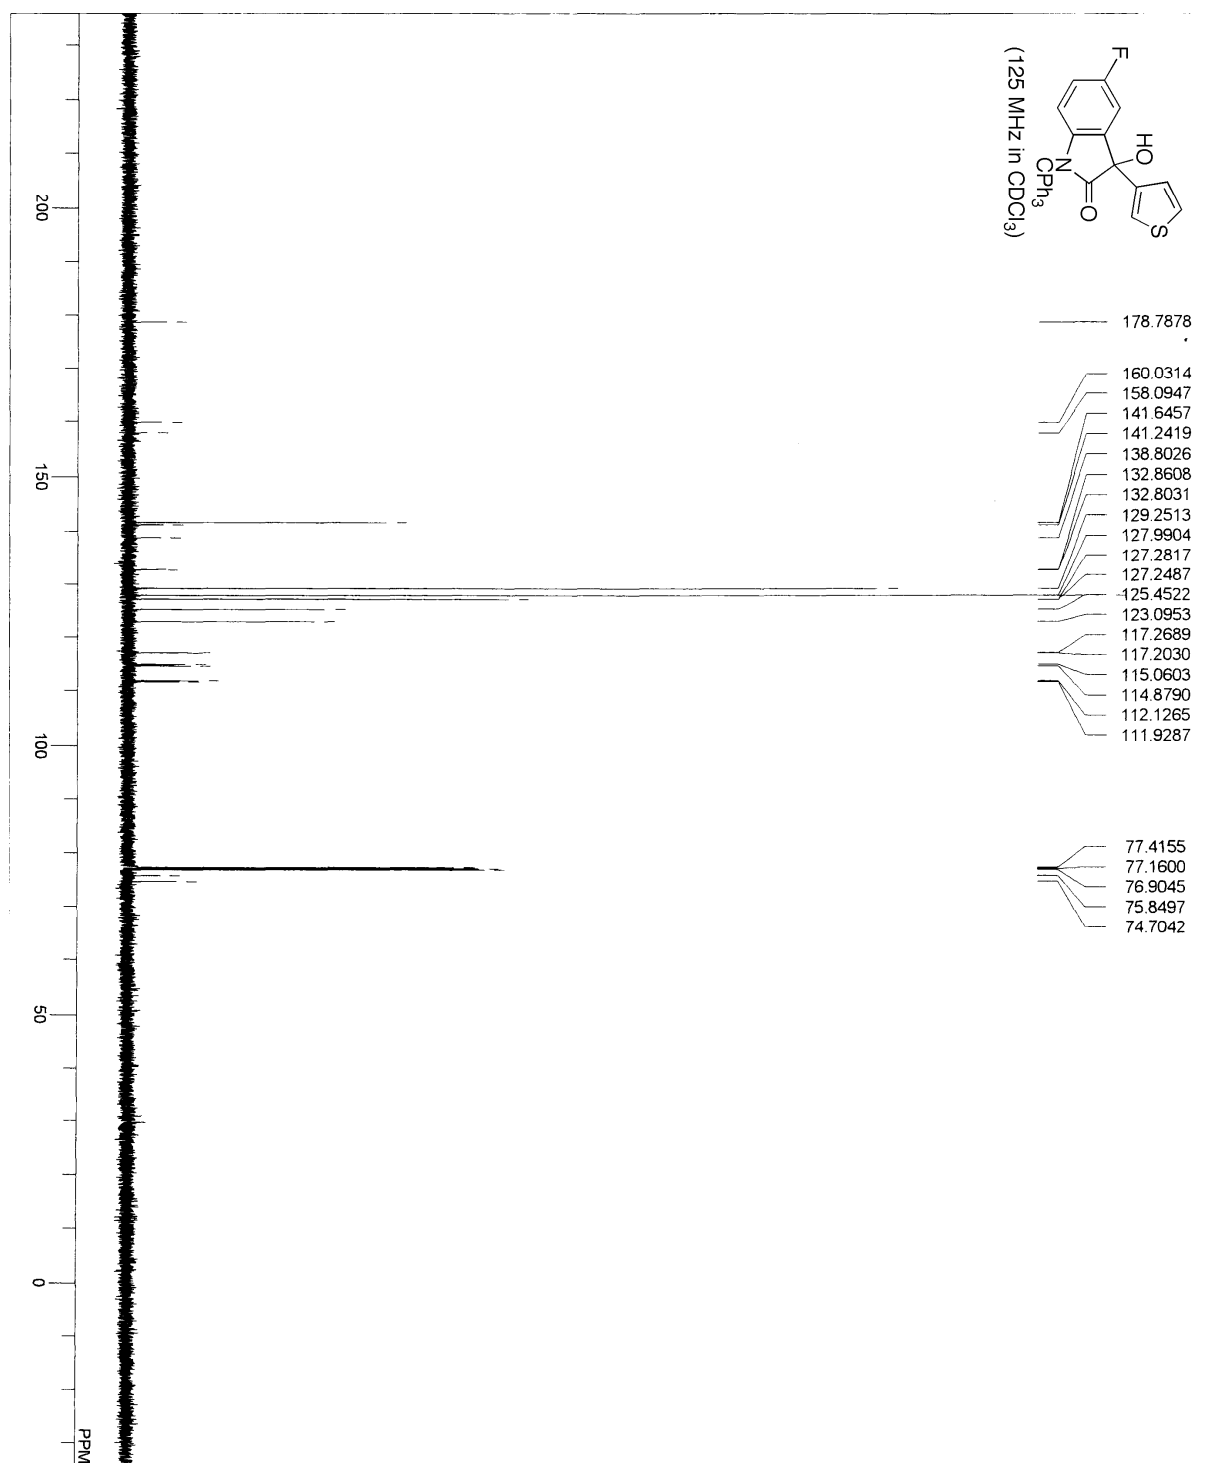



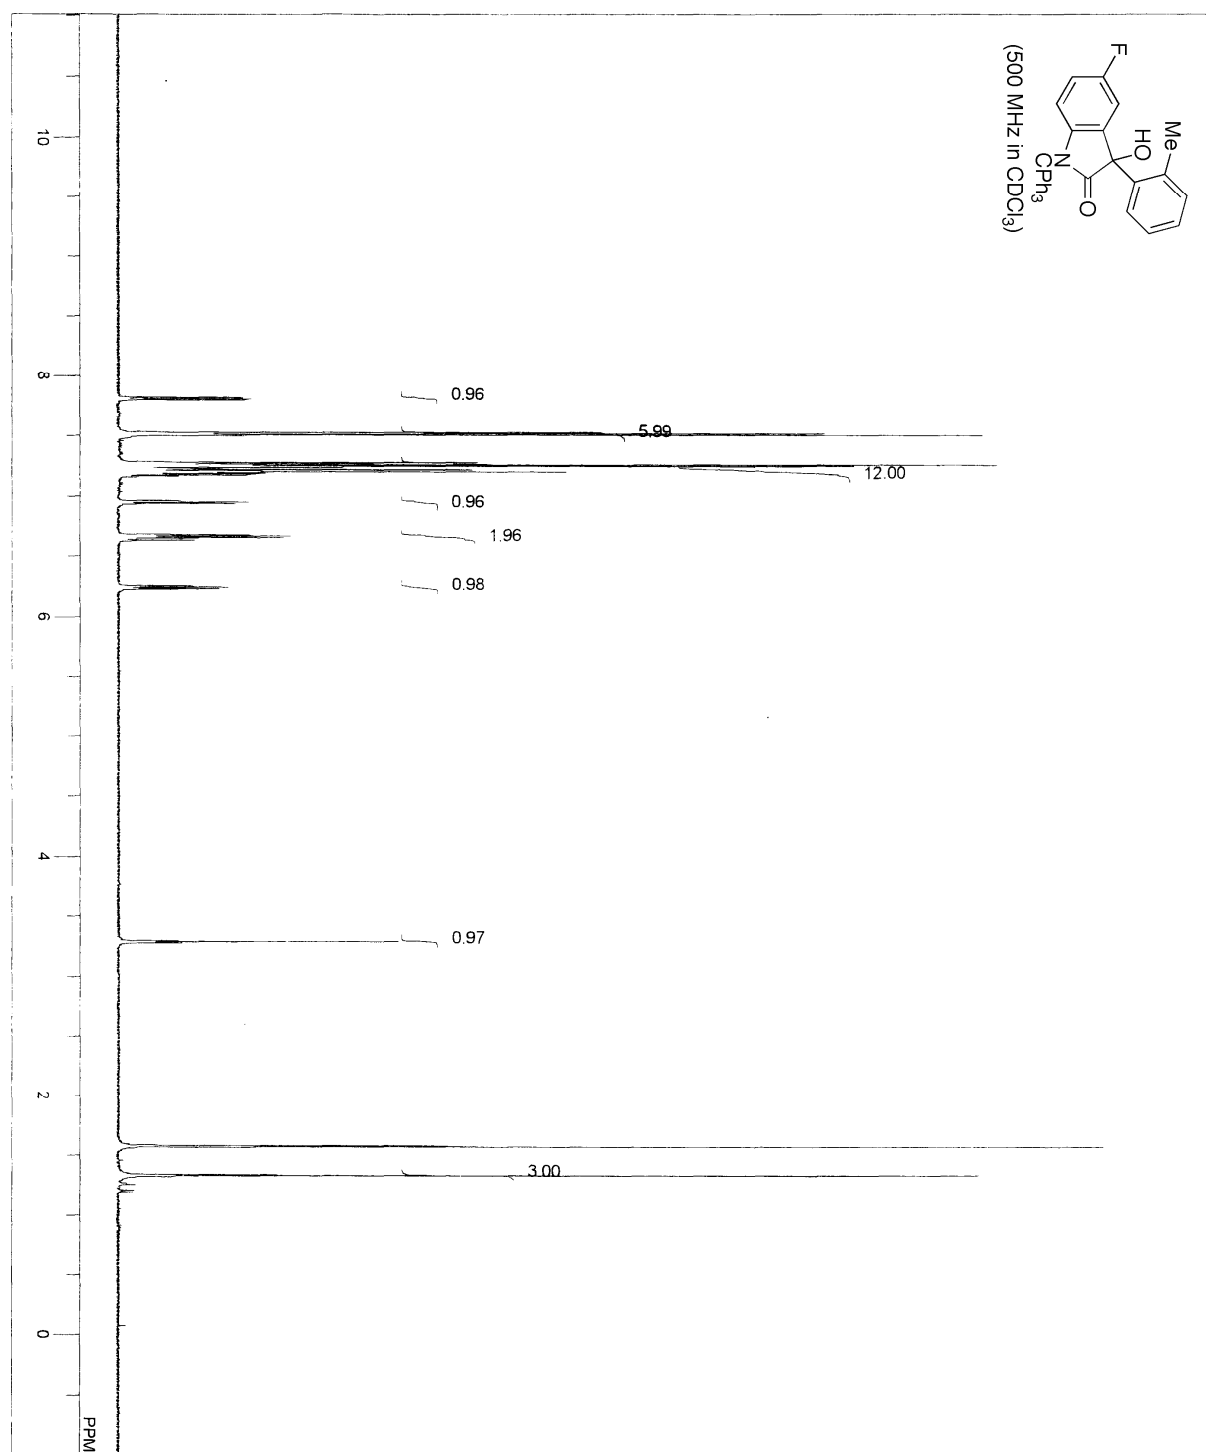

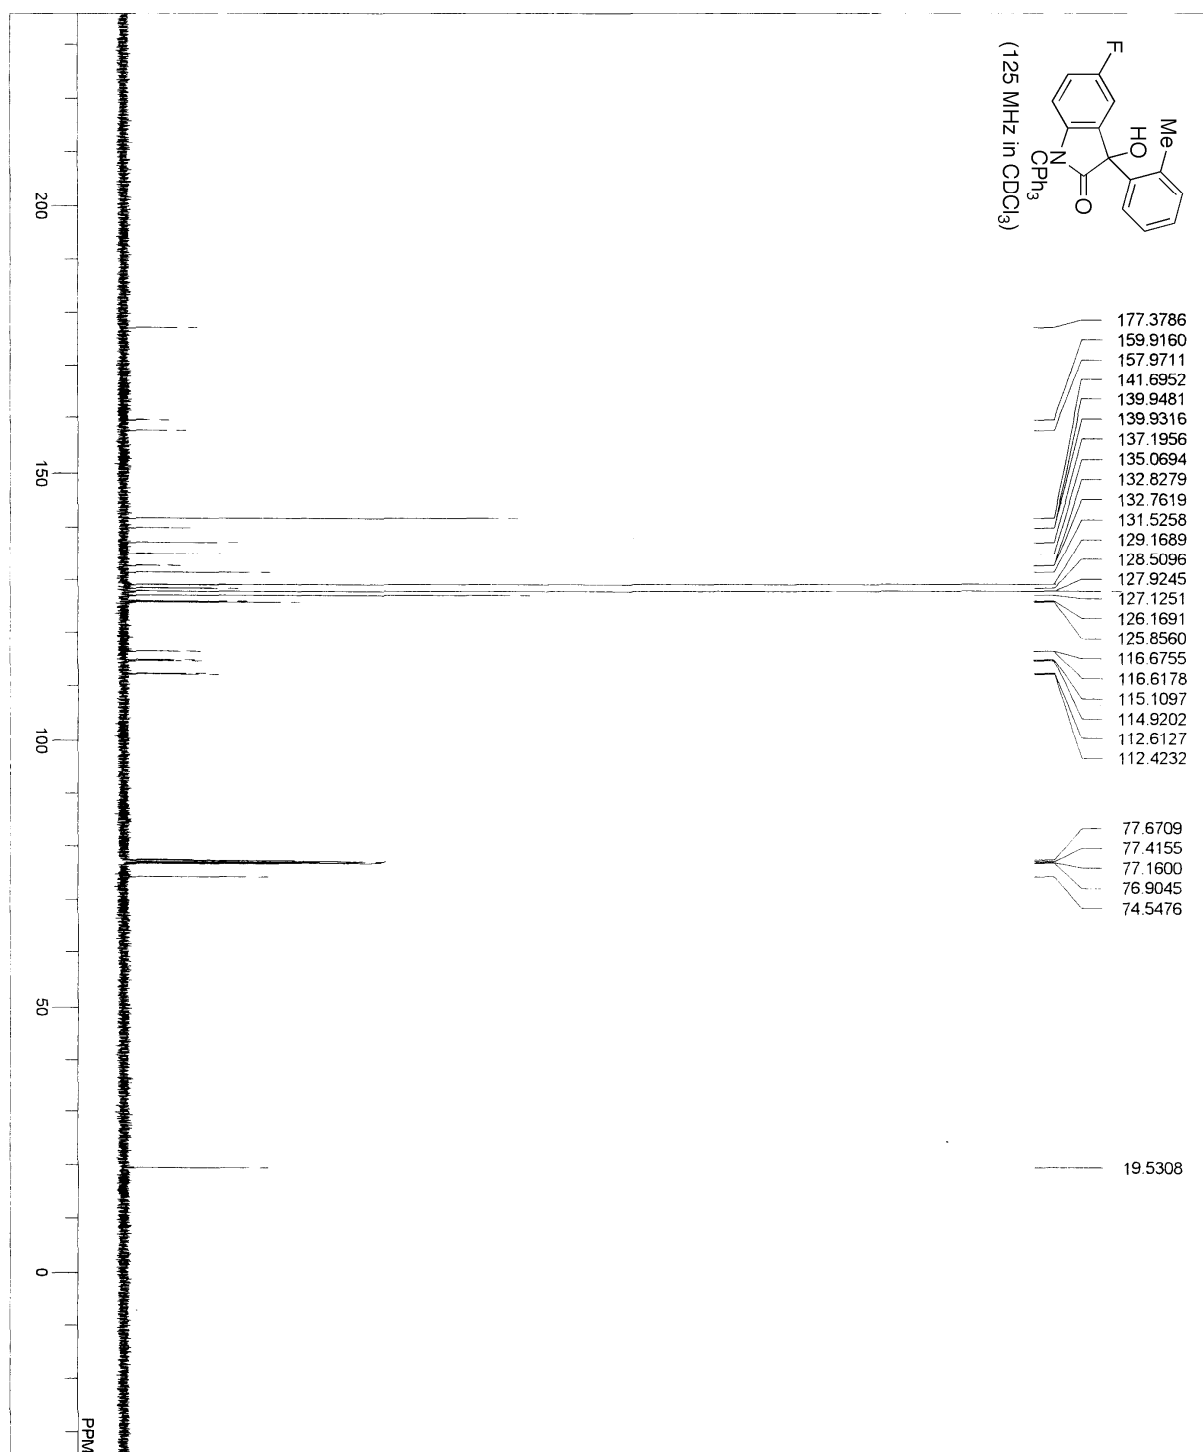

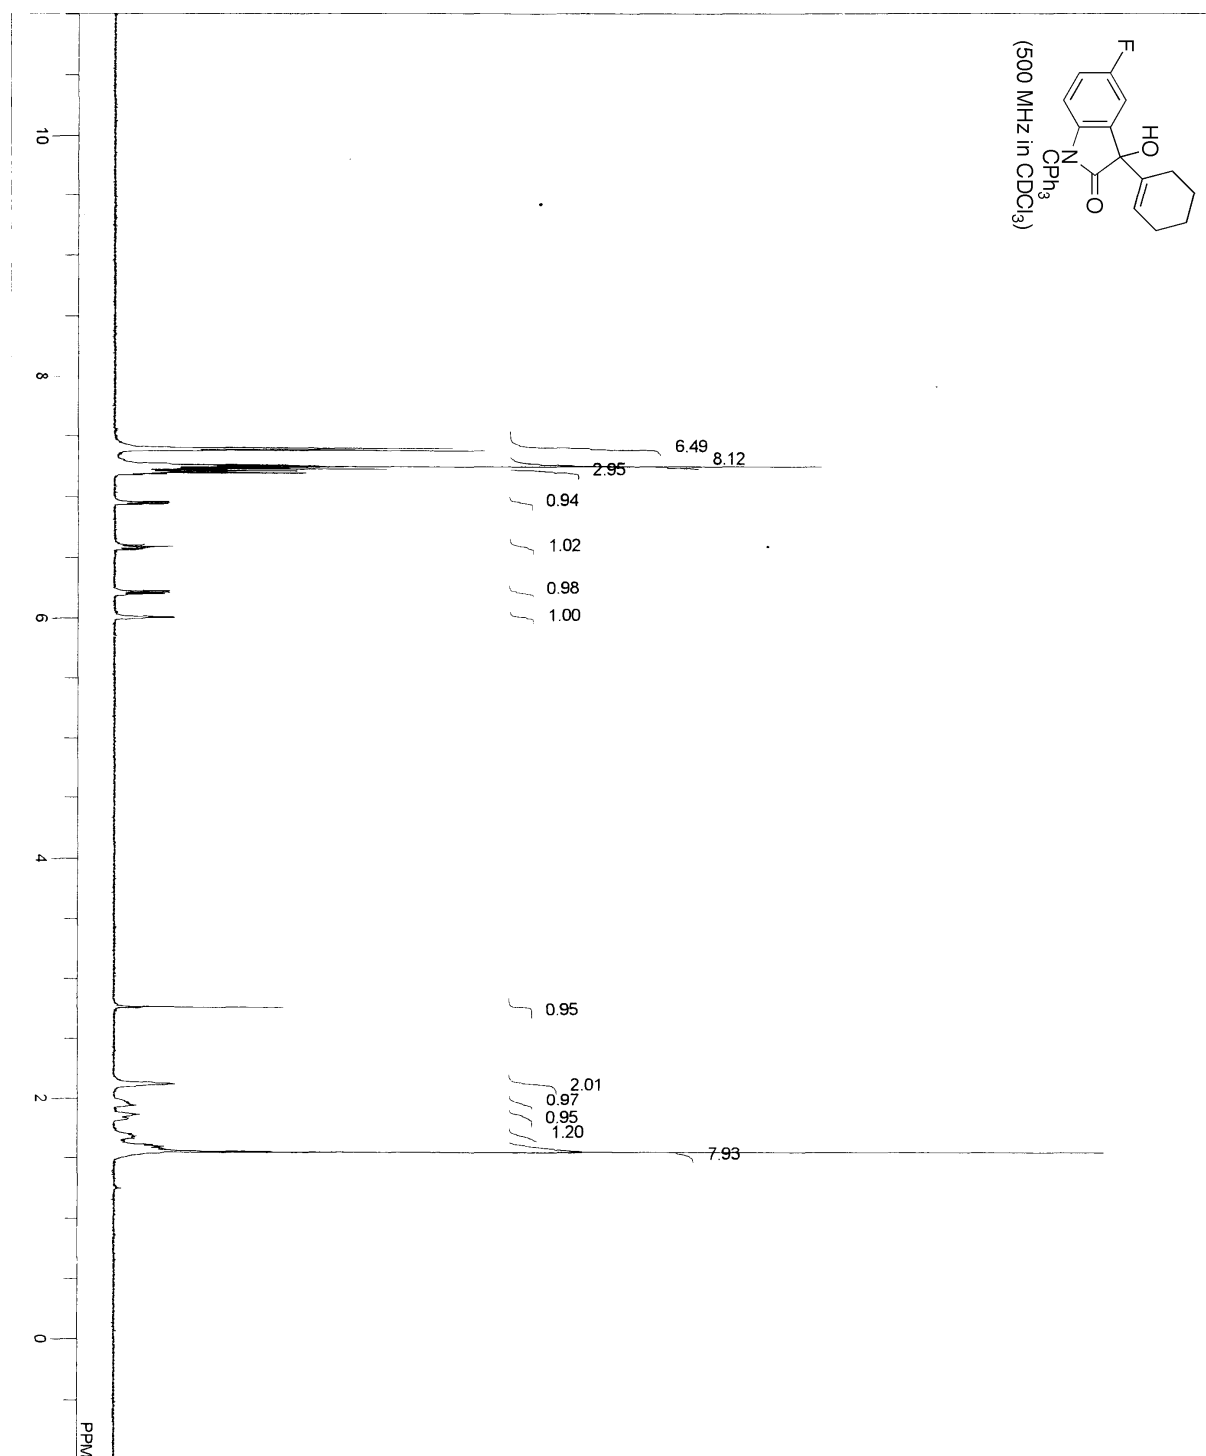

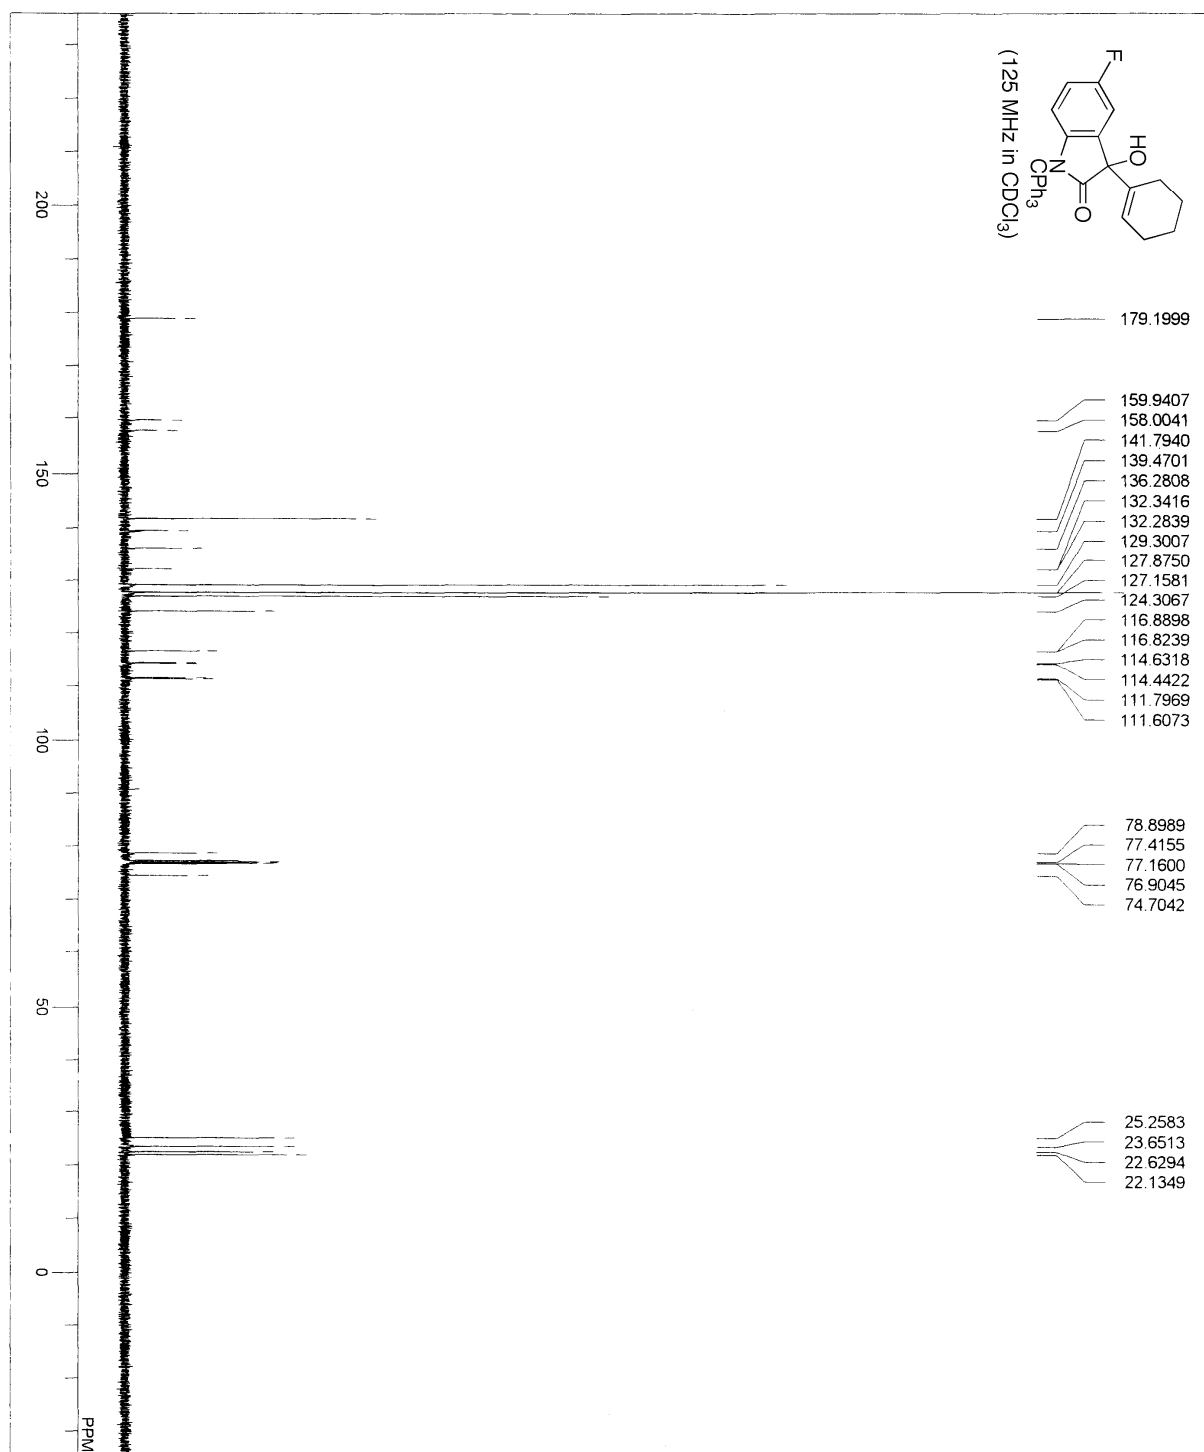

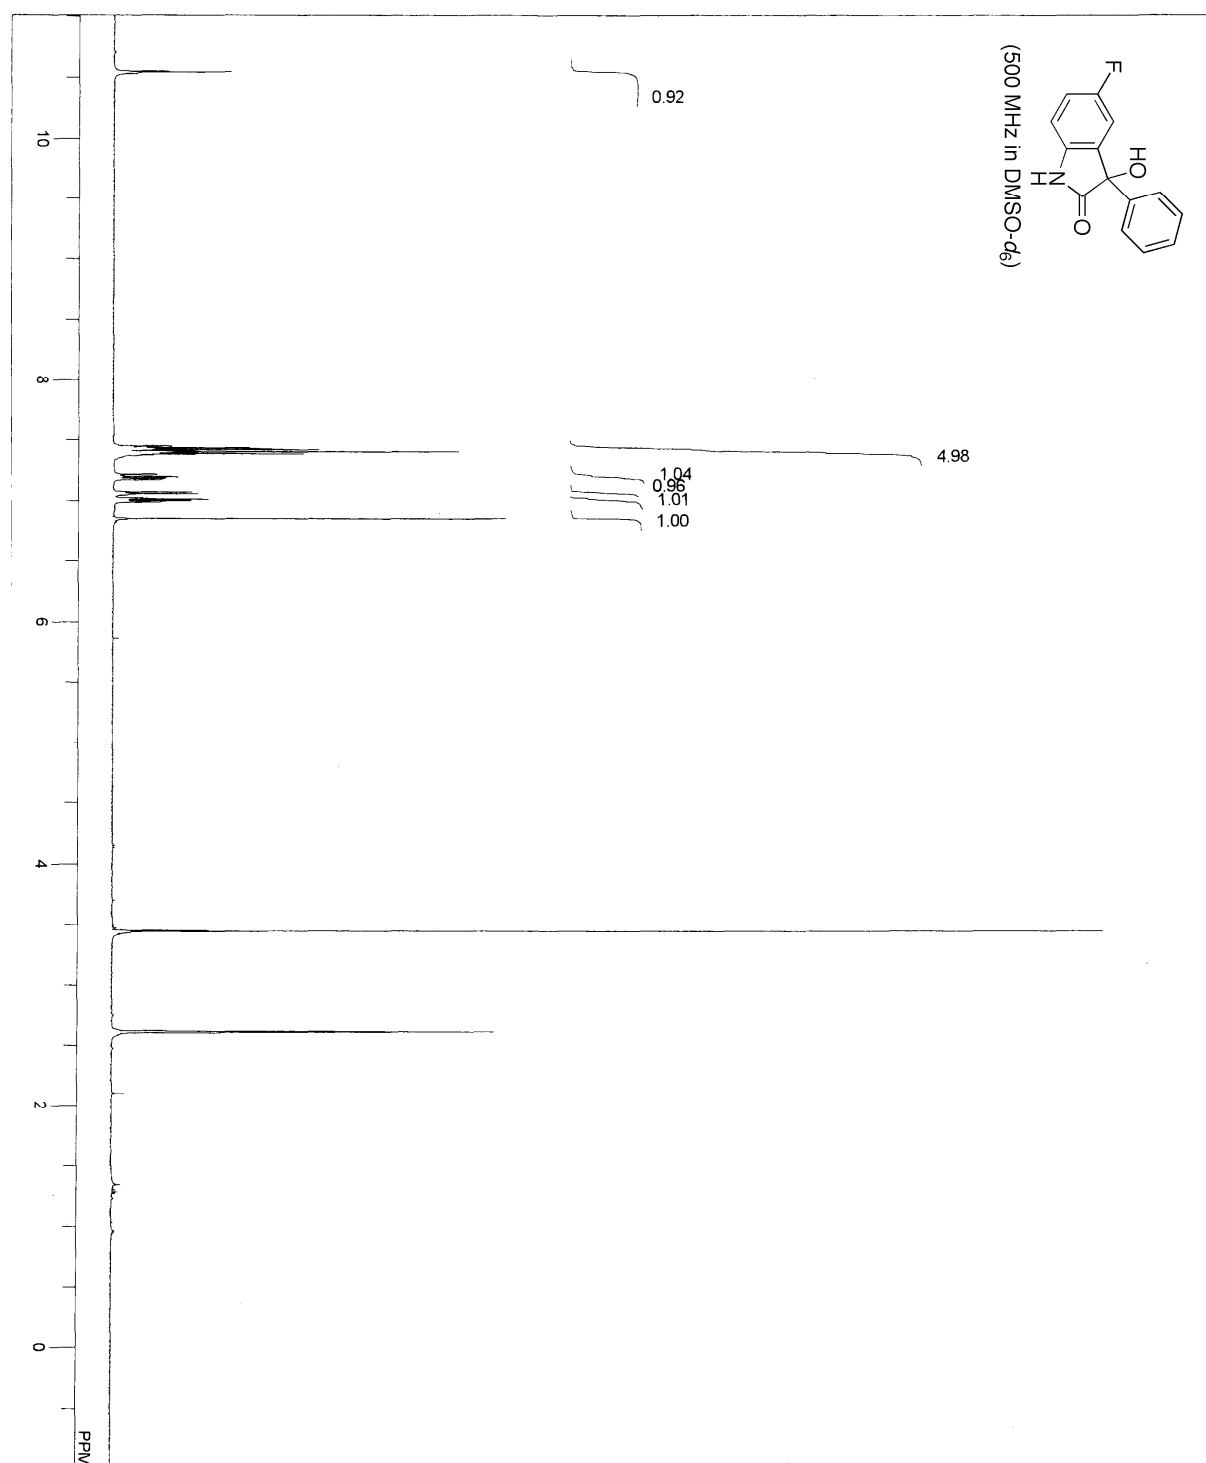

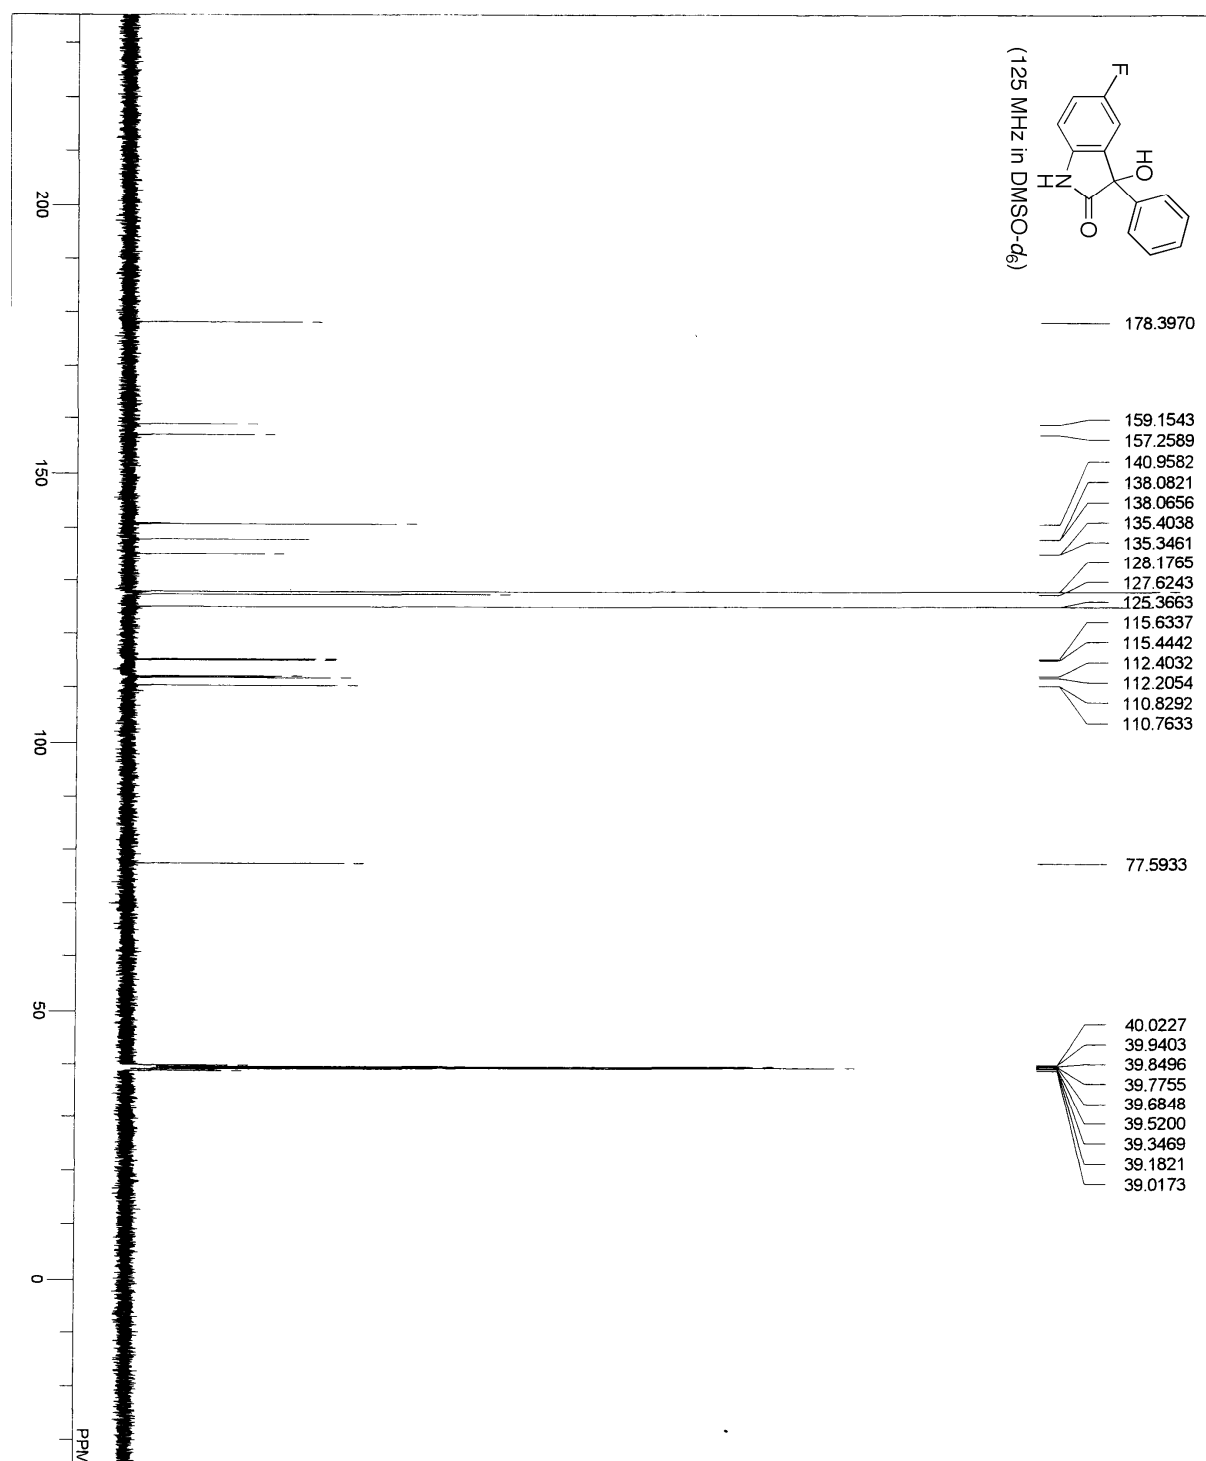

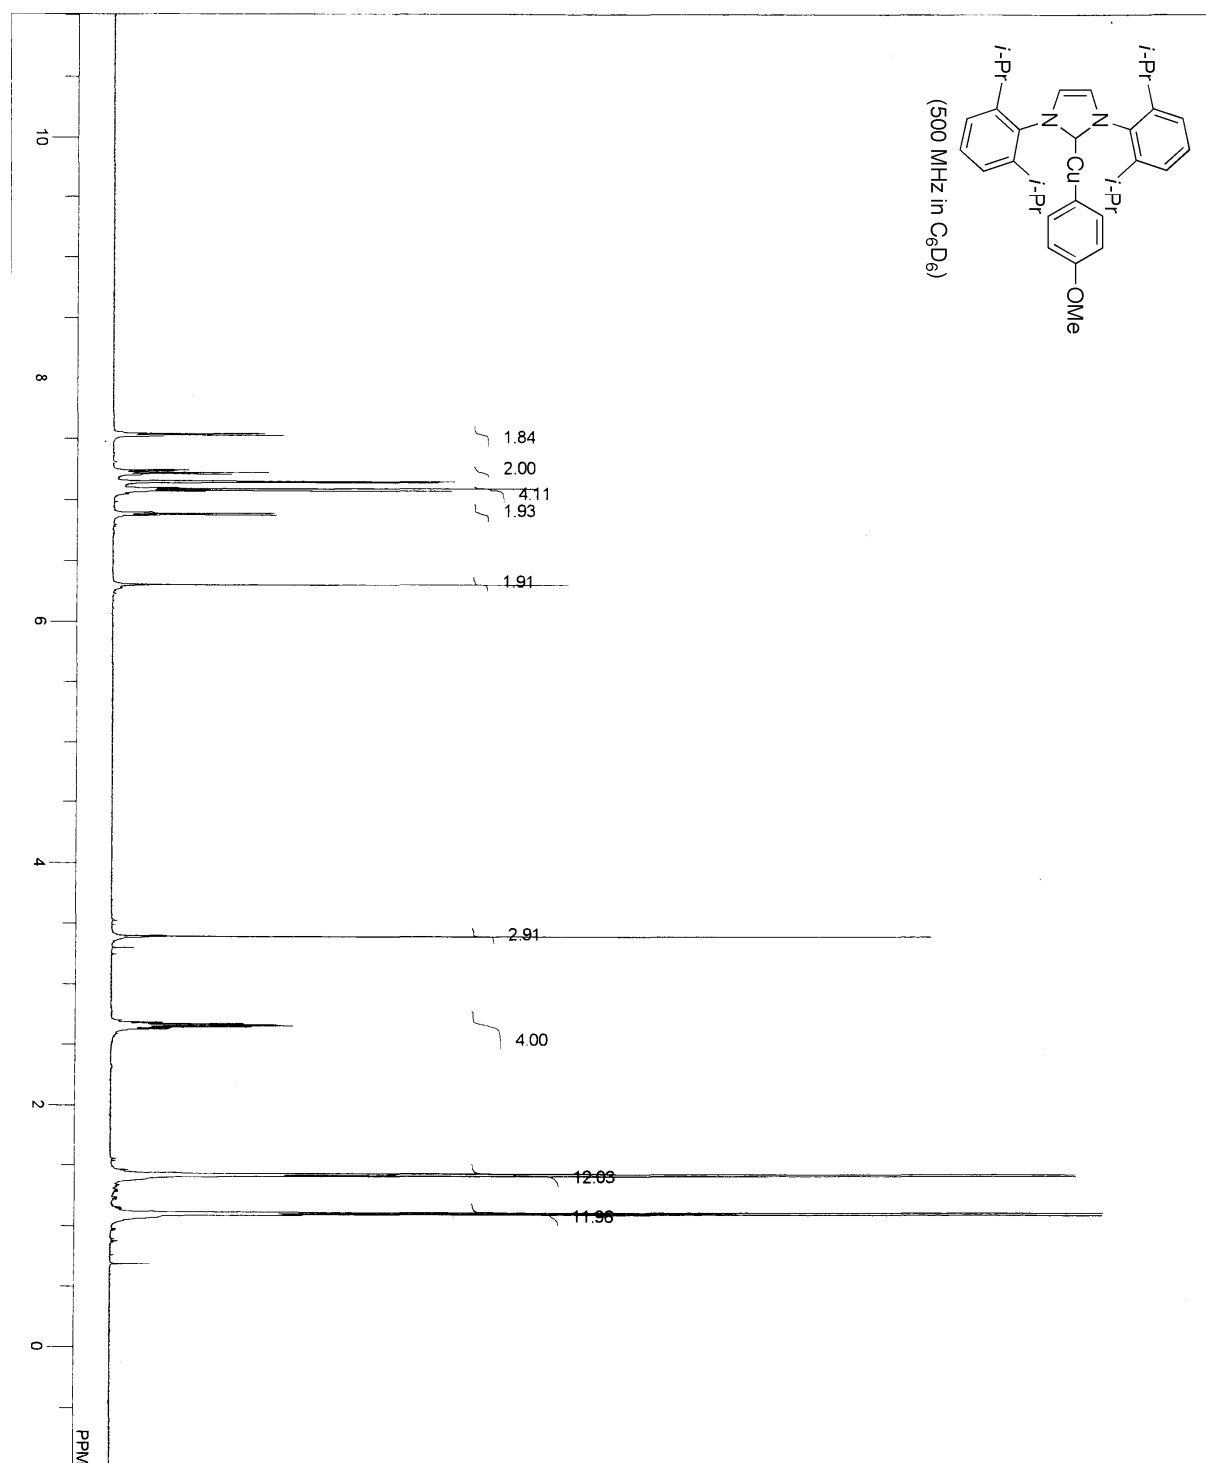

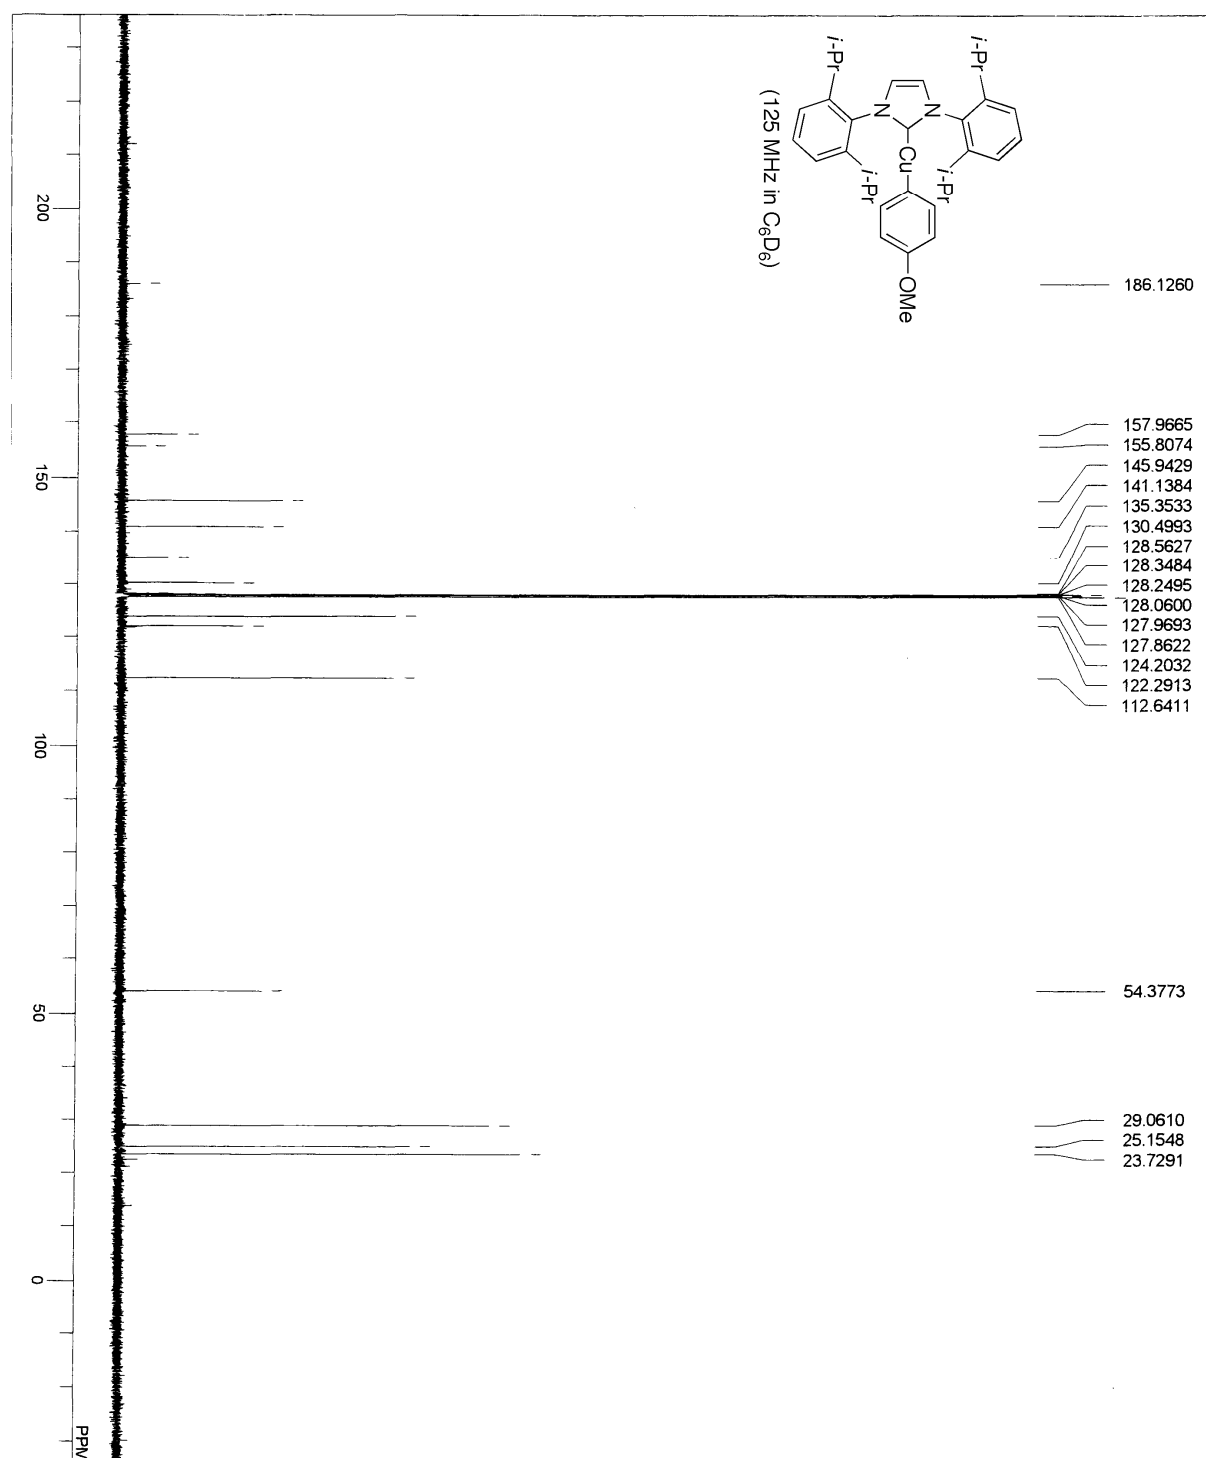



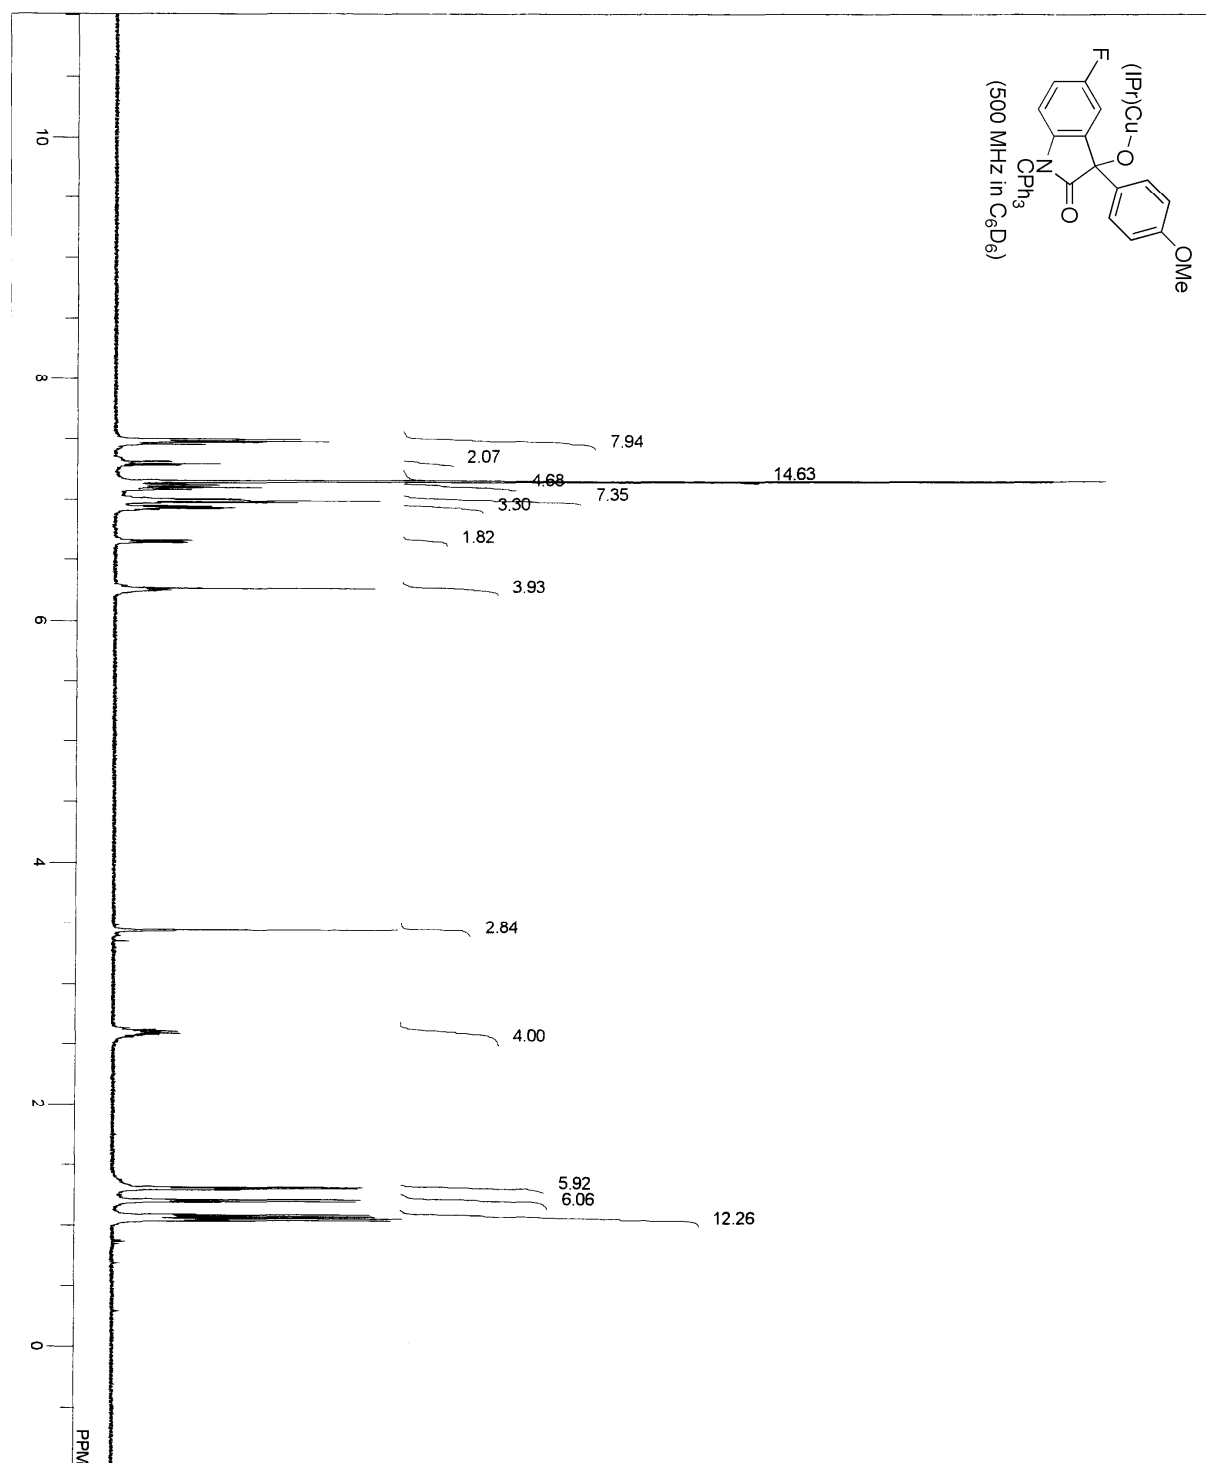

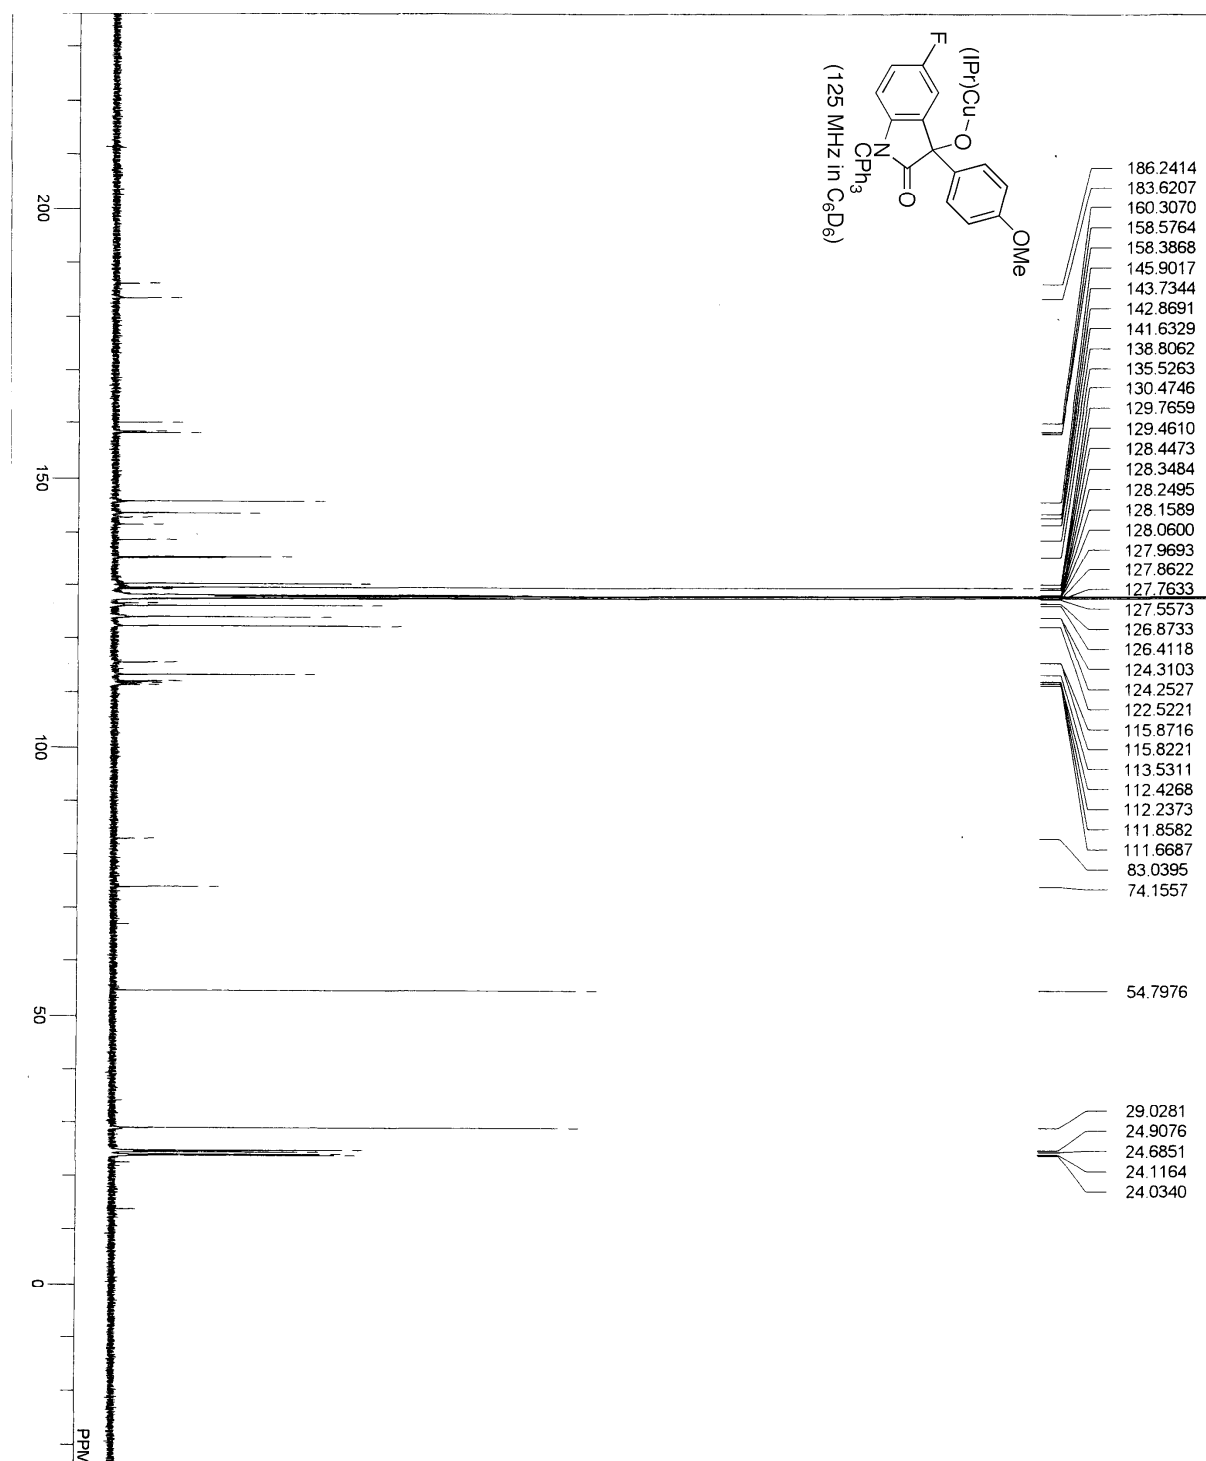

Supplement: c0cc01635g.pdf [file c0cc01635g.pdf]
